# Supplementary material for: An Early Prospective Clinical Study to Evaluate the Safety and Performance of the Versius Surgical System in Robot-Assisted Cholecystectomy
Source: PubMed Central journal article supplement — Ann Surg. 2022 Feb 15;277(1):9–17. doi: 10.1097/SLA.0000000000005410 (PMC9762713; doi:10.1097/sla.0000000000005410), 2022-02-15
Supplement: sla-277-0009-s003.pdf [file sla-277-0009-s003.pdf]

| Table A2: Component Diagnoses of Clinical Acute Care Categories |                                     |                    |                                      |                                     |
|-----------------------------------------------------------------|-------------------------------------|--------------------|--------------------------------------|-------------------------------------|
| Category                                                        | Clinical Grouping                   | Diagnosis Code     | Description                          |                                     |
| Digestive System Diseases                                       | Abdominal Pain                      | 56942              | ANAL OR RECTAL PAIN                  |                                     |
|                                                                 |                                     | 7873               | FLATULENCE ERUCTATION AND GAS PAIN   |                                     |
|                                                                 |                                     | 78900              | ABDOMINAL PAIN, UNSPECIFIED SITE     |                                     |
|                                                                 |                                     | 78901              | ABDOMINAL PAIN RIGHT UPPER QUADRANT  |                                     |
|                                                                 |                                     | 78902              | ABDOMINAL PAIN, LEFT UPPER QUADRANT  |                                     |
|                                                                 |                                     | 78903              | ABDOMINAL PAIN RIGHT LOWER QUADRANT  |                                     |
|                                                                 |                                     | 78904              | ABDOMINAL PAIN, LEFT LOWER QUADRANT  |                                     |
|                                                                 |                                     | 78905              | ABDOMINAL PAIN, PERIUMBILIC          |                                     |
|                                                                 |                                     | 78906              | ABDOMINAL PAIN, EPIGASTRIC           |                                     |
|                                                                 |                                     | 78907              | ABDOMINAL PAIN, GENERALIZED          |                                     |
|                                                                 |                                     | 78909              | ABDOMINAL PAIN, OTHER SPECIFIED SITE |                                     |
|                                                                 |                                     | 7890               | ABDOMINAL PAIN                       |                                     |
|                                                                 |                                     | 78966              | ABDOMINAL TENDERNESS, EPIGASTRIC     |                                     |
|                                                                 |                                     | 7897               | COLIC                                |                                     |
|                                                                 |                                     | R100               | ACUTE ABDOMEN                        |                                     |
|                                                                 |                                     | R1010              | UPPER ABDOMINAL PAIN, UNSPECIFIED    |                                     |
|                                                                 |                                     | R1011              | RIGHT UPPER QUADRANT PAIN            |                                     |
|                                                                 |                                     | R1012              | LEFT UPPER QUADRANT PAIN             |                                     |
|                                                                 |                                     | R1013              | EPIGASTRIC PAIN                      |                                     |
|                                                                 |                                     | R1030              | LOWER ABDOMINAL PAIN UNSPECIFIED     |                                     |
|                                                                 |                                     | R1031              | RIGHT LOWER QUADRANT PAIN            |                                     |
|                                                                 |                                     | R1032              | LEFT LOWER QUADRANT PAIN             |                                     |
|                                                                 |                                     | R1033              | PERIUMBILICAL PAIN                   |                                     |
|                                                                 |                                     | R10813             | RT LOWER QUADRANT ABD TENDERNESS     |                                     |
|                                                                 |                                     | R10816             | EPIGASTRIC ABDOMINAL TENDERNESS      |                                     |
|                                                                 |                                     | R1084              | GENERALIZED ABDOMINAL PAIN           |                                     |
|                                                                 |                                     | R109               | UNSPECIFIED ABDOMINAL PAIN           |                                     |
|                                                                 |                                     | Acute appendicitis | 5400                                 | ACUT APPENDICITIS W/GEN PERITONITIS |
|                                                                 |                                     |                    | 5401                                 | ACUTE APPENDICITIS W/PERITON ABSC   |
|                                                                 |                                     |                    | 5409                                 | ACUT APPENDICITIS W/O PERITONITIS   |
|                                                                 |                                     |                    | 541                                  | APPENDICITIS, UNQUALIFIED           |
|                                                                 |                                     |                    | 542                                  | OTHER APPENDICITIS                  |
|                                                                 |                                     |                    | K352                                 | ACUTE APPENDICITIS W/GEN PERITONIT  |
|                                                                 | K353                                |                    | ACUTE APPENDICITIS W/LOC PERITONIT   |                                     |
|                                                                 | K3580                               |                    | UNSPECIFIED ACUTE APPENDICITIS       |                                     |
|                                                                 | K3589                               |                    | OTHER ACUTE APPENDICITIS             |                                     |
|                                                                 | Constipation, impaction or diarrhea | 56032              | FECAL IMPACTION                      |                                     |
|                                                                 |                                     | 56039              | OTHER IMPACTION OF INTESTINE         |                                     |
|                                                                 |                                     | 56400              | UNSPECIFIED CONSTIPATION             |                                     |
|                                                                 |                                     | 78791              | DIARRHEA                             |                                     |
|                                                                 |                                     | K5900              | CONSTIPATION UNSPECIFIED             |                                     |
|                                                                 |                                     | K5641              | FECAL IMPACTION                      |                                     |

**Table A2: Component Diagnoses of Clinical Acute Care Categories, continued**

| Category                             | Clinical Grouping            | Diagnosis Code                       | Description                         |
|--------------------------------------|------------------------------|--------------------------------------|-------------------------------------|
| Digestive System Diseases, continued | Colonic diverticulitis       | 56211                                | DIVERTICULITIS OF COLON             |
|                                      |                              | K5713                                | DVTRCLI SM INT W/O PERF/ABSC W/BL   |
|                                      |                              | K5732                                | DVTRCLI LG INT NO PERF/ABSC W/O BL  |
|                                      |                              | K5792                                | DVTRCLI PRT UNS NO PERF/ABSC W/O BL |
|                                      | Enteritis or Colitis         | 5551                                 | REGIONAL ENTERITIS LARGE INTESTINE  |
|                                      |                              | 5559                                 | REGIONAL ENTERITIS UNSPECIFIED SITE |
|                                      |                              | 5589                                 | UNS NONINF GASTROENTERIT&COLITIS    |
|                                      |                              | K529                                 | NONINFECTIVE GE & COLITIS UNS       |
|                                      | Gastritis without hemorrhage | 53140                                | CHRN/UNS GASTR ULCR W/HEM W/O OBST  |
|                                      |                              | 53190                                | GSTR ULCR UNS NO HEMOR-PERF/OBST    |
|                                      |                              | 53390                                | PEPTC ULCR UNS NO HEMOR-PERF/OBST   |
|                                      |                              | 53430                                | AC GSTROJEJ ULCR NO HEMOR-PERF/OBST |
|                                      |                              | 53490                                | GSTROJEJ ULCR UNS NO HMOR-PERF/OBST |
|                                      |                              | 53500                                | ACUTE GASTRITIS W/O MENTION HEMORR  |
|                                      |                              | 53530                                | ALCOHLIC GASTRITIS W/O HEMOR        |
|                                      |                              | 53550                                | UNS GASTRIT&GASTRODUODIT NO HEMORR  |
|                                      |                              | 53551                                | UNS GASTRIT&GASTRODUODENIT W/HEMORR |
|                                      |                              | K2900                                | ACUTE GASTRITIS WITHOUT BLEEDING    |
|                                      |                              | K2970                                | GASTRITIS UNS WITHOUT BLEEDING      |
|                                      |                              | Gallbladder or biliary tract disease | 57400                               |
|                                      | 57401                        |                                      | CALCU GB W/ACUT CHOLCYST&OBST       |
|                                      | 57410                        |                                      | CALCU GB W/OTH CHOLCYST W/O OBST    |
|                                      | 57420                        |                                      | CALCU GB W/O MENTION CHOLCYST/OBST  |
|                                      | 57421                        |                                      | CALCU GB W/O CHOLCYST W/OBST        |
|                                      | 57430                        |                                      | CALCU BD W/ACUT CHOLCYST W/O OBST   |
|                                      | 57450                        |                                      | CALCU BD W/O MENTION CHOLECYST/OBST |
|                                      | 57451                        |                                      | CALCU BD W/O CHOLCYST W/OBST        |
|                                      | 57460                        |                                      | CALCU GB&BD W/AC CHOLCYST W/O OBST  |
|                                      | 57461                        |                                      | CALCU GB&BD W/ACUT CHOLCYST W/OBST  |
|                                      | 57470                        |                                      | CALCU GB&BD W/OTH CHOLCYST W/O OBST |
|                                      | 57471                        |                                      | CALCU GB&BD W/OTH CHOLCYST W/OBST   |
|                                      | 57480                        |                                      | CALCU GB&BD CHOLCYST NO OBST        |
|                                      | 57481                        |                                      | CALCU GB&BD-ACUT&CHRN CHOLCYST-OBST |
|                                      | 57490                        |                                      | CALCU GB&BD W/O CHOLCYST W/O OBST   |
|                                      | 5750                         |                                      | ACUTE CHOLECYSTITIS                 |
|                                      | 57510                        |                                      | CHOLECYSTITIS, UNSPECIFIED          |
|                                      | 57511                        |                                      | CHRONIC CHOLECYSTITIS               |
|                                      | 5758                         |                                      | OTHER SPEC DISORDER GALLBLADDER     |
|                                      | 5762                         |                                      | OBSTRUCTION OF BILE DUCT            |
|                                      | 5768                         |                                      | OTHER SPEC DISORDERS BILIARY TRACT  |
|                                      | 75169                        |                                      | OTH CONGN ANOMALY GB BDS&LIVER      |
|                                      | 99741                        |                                      | RETAIND CHOLELITHISIS FLW CHOLECYST |
|                                      | K8000                        |                                      | CALCU GB W/AC CHOLECYST W/O OBST    |
|                                      | K8012                        |                                      | CALCU GB W/AC CHRN CHOLCYST NO OBST |
|                                      | K8013                        |                                      | CALCU GB W/AC CHRN CHOLECYST W/OBST |
|                                      | K8020                        |                                      | CALCU GB W/O CHOLECYST W/O OBST     |
|                                      | K8021                        |                                      | CALCU GB W/O CHOLECYST W/OBST       |

| <b>Table A2: Component Diagnoses of Clinical Acute Care Categories, continued</b> |                                                                 |                       |                                     |
|-----------------------------------------------------------------------------------|-----------------------------------------------------------------|-----------------------|-------------------------------------|
| <b>Category</b>                                                                   | <b>Clinical Grouping</b>                                        | <b>Diagnosis Code</b> | <b>Description</b>                  |
| Digestive System Diseases, continued                                              | Gallbladder or biliary tract disease, continued                 | K8044                 | CALCU BD W/CHRN CHOLCYST W/O OBST   |
|                                                                                   |                                                                 | K8050                 | CALC BD NO CHOLANG/CHOLCYST NO OBST |
|                                                                                   |                                                                 | K8062                 | CALCU GB BD W/AC CHOLCYST W/O OBST  |
|                                                                                   |                                                                 | K8064                 | CALCU GB BD W/CHRN CHOLCYST NO OBST |
|                                                                                   |                                                                 | K8065                 | CALCU GB BD W/CHRN CHOLCYST W/OBST  |
|                                                                                   |                                                                 | K8070                 | CALCU GB BD W/O CHOLCYST W/O OBST   |
|                                                                                   |                                                                 | K8080                 | OTH CHOLELITHIASIS W/O OBSTRUCTION  |
|                                                                                   |                                                                 | K810                  | ACUTE CHOLECYSTITIS                 |
|                                                                                   |                                                                 | K819                  | CHOLECYSTITIS UNSPECIFIED           |
|                                                                                   |                                                                 | K828                  | OTHER SPEC DISEASES GALLBLADDER     |
|                                                                                   |                                                                 | K829                  | DISEASE OF GALLBLADDER UNSPECIFIED  |
|                                                                                   |                                                                 | K8510                 | BILIARY ACUTE PANCREATIT WO NEC/INF |
|                                                                                   | GERD, esophagitis, or esophageal stricture                      | 53010                 | UNSPECIFIED ESOPHAGITIS             |
|                                                                                   |                                                                 | 53011                 | REFLUX ESOPHAGITIS                  |
|                                                                                   |                                                                 | 5303                  | STRICTURE AND STENOSIS OF ESOPHAGUS |
|                                                                                   |                                                                 | 53081                 | ESOPHAGEAL REFLUX                   |
|                                                                                   |                                                                 | K210                  | GERD WITH ESOPHAGITIS               |
|                                                                                   |                                                                 | K219                  | GERD WITHOUT ESOPHAGITIS            |
|                                                                                   | Upper or lower GI bleeding, including due to ulcerative disease | 53100                 | ACUT GASTR ULCR W/HEM W/O OBST      |
|                                                                                   |                                                                 | 53340                 | CHRN/UNS PEPTC ULCR W/HEM W/O OBST  |
|                                                                                   |                                                                 | 53400                 | ACUT GASTROJEJ ULCR W/HEM W/O OBST  |
|                                                                                   |                                                                 | 53440                 | CHRN/UNS GSTROJEJ ULCR W/HEMORR     |
|                                                                                   |                                                                 | 53470                 | CHRN GSTROJEJ ULCR NO HMOR-PRF/OBST |
|                                                                                   |                                                                 | 56210                 | DIVERTICULOSIS OF COLON             |
|                                                                                   |                                                                 | 56212                 | DIVERTICULOSIS COLON W/HEMORRHAGE   |
|                                                                                   |                                                                 | 5693                  | HEMORRHAGE OF RECTUM AND ANUS       |
|                                                                                   |                                                                 | 5780                  | HEMATEMESIS                         |
|                                                                                   |                                                                 | 5781                  | BLOOD IN STOOL                      |
|                                                                                   |                                                                 | 5789                  | UNSPEC HEMORRHAGE GI TRACT          |
|                                                                                   |                                                                 | K226                  | GASTRO-ESOPHAGEAL LAC-HEMORR SYND   |
|                                                                                   |                                                                 | K250                  | ACUTE GASTRIC ULCER WITH HEMORRHAGE |
|                                                                                   |                                                                 | K284                  | CHRON/UNS GASTROJEJUN ULCR W/HEMORR |
|                                                                                   |                                                                 | K625                  | HEMORRHAGE OF ANUS AND RECTUM       |
|                                                                                   |                                                                 | K91840                | POSTPROC HEM DS ORG/STR FLW DS PROC |
|                                                                                   |                                                                 | K920                  | HEMATEMESIS                         |
|                                                                                   |                                                                 | K921                  | MELENA                              |
|                                                                                   | Hemorrhoids, external or internal                               | 4550                  | INTRL HEMORRHOIDS W/O MENTION COMP  |
|                                                                                   |                                                                 | 4553                  | EXT HEMORRHOIDS W/O MENTION COMP    |
|                                                                                   |                                                                 | 4554                  | EXTERNAL THROMBOSED HEMORRHOIDS     |
|                                                                                   |                                                                 | 4556                  | UNSPEC HEMORRHOIDS W/O MENTION COMP |
|                                                                                   |                                                                 | 4557                  | UNSPECIFIED THROMBOSED HEMORRHOIDS  |
|                                                                                   |                                                                 | 4558                  | UNSPEC HEMORRHOIDS W/OTH COMP       |
|                                                                                   |                                                                 | K644                  | RESIDUAL HEMORRHOIDAL SKIN TAGS     |

**Table A2: Component Diagnoses of Clinical Acute Care Categories, continued**

| Category                             | Clinical Grouping                                      | Diagnosis Code       | Description                         |
|--------------------------------------|--------------------------------------------------------|----------------------|-------------------------------------|
| Digestive System Diseases, continued | Hernia without obstruction                             | 55091                | INGUINAL HERNIA RECUR UNILAT/UNS    |
|                                      |                                                        | 55121                | INCI VENTRAL HERNIA W/GANGRENE      |
|                                      |                                                        | 5531                 | UMB HERN W/O MENTION OBST/GANGREN   |
|                                      |                                                        | 55320                | UNS VENTRAL HERN W/O OBST/GANGREN   |
|                                      |                                                        | 55321                | INCI HERN W/O MENTION OBST/GANGREN  |
|                                      |                                                        | 55329                | OTH VENTRAL HERN W/O OBST/GANGREN   |
|                                      |                                                        | 5533                 | DIAPHRAGMAT HERN W/O OBST/GANGREN   |
|                                      |                                                        | 5538                 | HERN-OTH ABD CAV NO OBST/GANGREN    |
|                                      |                                                        | 5539                 | HERN ABD CAV W/O OBST/GANGREN       |
|                                      |                                                        | K432                 | INCI HERNIA W/O OBSTRUCTION/GANGREN |
|                                      | Nausea or Vomiting                                     | 5362                 | PERSISTENT VOMITING                 |
|                                      |                                                        | 78701                | NAUSEA WITH VOMITING                |
|                                      |                                                        | 78702                | NAUSEA ALONE                        |
|                                      |                                                        | 78703                | VOMITING ALONE                      |
|                                      |                                                        | R110                 | NAUSEA                              |
|                                      |                                                        | R1110                | VOMITING UNSPECIFIED                |
|                                      |                                                        | R112                 | NAUSEA WITH VOMITING UNSPECIFIED    |
|                                      | GI obstruction (small or large bowel), ileus, volvulus | 55010                | ING HERN W/OBST NO GANGRN UNILT/UNS |
|                                      |                                                        | 55011                | ING HERNIA W/OBST RECUR UNILAT/UNS  |
|                                      |                                                        | 55200                | UNILAT/UNSPEC FEM HERN W/OBST       |
|                                      |                                                        | 5521                 | UMBILICAL HERNIA WITH OBSTRUCTION   |
|                                      |                                                        | 55220                | UNSPEC VENTRAL HERNIA W/OBSTRUCTION |
|                                      |                                                        | 55229                | OTHER VENTRAL HERNIA W/OBSTRUCTION  |
|                                      |                                                        | 5523                 | DIAPHRAGMATIC HERNIA W/OBSTRUCTION  |
|                                      |                                                        | 5528                 | HERNIA OTH SPEC SITE W/OBSTRUCTION  |
|                                      |                                                        | 5529                 | HERNIA UNSPEC SITE W/OBSTRUCTION    |
|                                      |                                                        | 5601                 | PARALYTIC ILEUS                     |
|                                      |                                                        | 5602                 | VOLVULUS                            |
|                                      |                                                        | 56081                | INTEST/PERITON ADHES W/OBSTRUCTION  |
|                                      |                                                        | 5609                 | UNSPECIFIED INTESTINAL OBSTRUCTION  |
|                                      |                                                        | K430                 | INCISION HERNIA W/OBST W/O GANGRENE |
|                                      |                                                        | K436                 | OTH UNS VNTRL HERN OBSTRCT NO GANGR |
|                                      |                                                        | K460                 | UNS ABD HERNIA W/OBST W/O GANGRENE  |
|                                      |                                                        | K560                 | PARALYTIC ILEUS                     |
|                                      |                                                        | K562                 | VOLVULUS                            |
|                                      |                                                        | K5660                | UNSPECIFIED INTESTINAL OBSTRUCTION  |
|                                      |                                                        | Pancreatic diagnoses | 5770                                |
|                                      | 5778                                                   |                      | OTHER SPECIFIED DISEASE OF PANCREAS |
|                                      | 5779                                                   |                      | UNSPECIFIED DISEASE OF PANCREAS     |

| <b>Table A2: Component Diagnoses of Clinical Acute Care Categories, continued</b> |                                     |                       |                                     |
|-----------------------------------------------------------------------------------|-------------------------------------|-----------------------|-------------------------------------|
| <b>Category</b>                                                                   | <b>Clinical Grouping</b>            | <b>Diagnosis Code</b> | <b>Description</b>                  |
| Digestive System Diseases, continued                                              | Miscellaneous GI tract diagnoses    | 0059                  | UNSPECIFIED FOOD POISONING          |
|                                                                                   |                                     | 5304                  | PERFORATION OF ESOPHAGUS            |
|                                                                                   |                                     | 5305                  | DYSKINESIA OF ESOPHAGUS             |
|                                                                                   |                                     | 53641                 | INFECTION OF GASTROSTOMY            |
|                                                                                   |                                     | 53642                 | MECHANICAL COMPLICATION GASTROSTOMY |
|                                                                                   |                                     | 5368                  | DYSPEPSIA&OTH D/O FUNCT STOMACH     |
|                                                                                   |                                     | 5374                  | FISTULA OF STOMACH OR DUODENUM      |
|                                                                                   |                                     | 5375                  | GASTROPTOSIS                        |
|                                                                                   |                                     | 53789                 | OTH SPEC DISORDER STOMACH&DUODENUM  |
|                                                                                   |                                     | 53909                 | OTH COMPLICATIONS GASTRIC BAND PROC |
|                                                                                   |                                     | 53989                 | OTH COMP OTH BARIATRIC PROCEDURE    |
|                                                                                   |                                     | 5570                  | ACUTE VASCULAR INSUFF INTESTINE     |
|                                                                                   |                                     | 5579                  | UNSPEC VASCULAR INSUFF INTESTINE    |
|                                                                                   |                                     | 5650                  | ANAL FISSURE                        |
|                                                                                   |                                     | 566                   | ABSCESS OF ANAL AND RECTAL REGIONS  |
|                                                                                   |                                     | 56722                 | PERITONEAL ABSCESS                  |
|                                                                                   |                                     | 5679                  | UNSPECIFIED PERITONITIS             |
|                                                                                   |                                     | 5680                  | PERITONEAL ADHESIONS                |
|                                                                                   |                                     | 56889                 | OTHER SPECIFIED DISORDER PERITONEUM |
|                                                                                   |                                     | 56949                 | OTHER SPEC DISORDER RECTUM&ANUS     |
|                                                                                   |                                     | 56971                 | POUCHITIS                           |
|                                                                                   |                                     | 56981                 | FISTULA INTESTINE EXCLD RECTUM&ANUS |
|                                                                                   |                                     | 56983                 | PERFORATION OF INTESTINE            |
|                                                                                   |                                     | 56989                 | OTHER SPECIFIED DISORDER INTESTINES |
|                                                                                   |                                     | 5715                  | CIRRHOSIS LIVER W/O MENTION ALCOHOL |
|                                                                                   |                                     | 5720                  | ABSCESS OF LIVER                    |
|                                                                                   |                                     | 5793                  | OTH&UNSPEC POSTSURGICAL NONABSORB   |
|                                                                                   |                                     | 5799                  | UNSPEC INTESTINAL MALABSORPTION     |
|                                                                                   |                                     | 64671                 | LIVER DISORDERS PREGNANCY W/DELIV   |
|                                                                                   |                                     | 7515                  | OTH CONGENITAL ANOMALIES INTESTINE  |
|                                                                                   |                                     | 7824                  | JAUNDICE UNSPECIFIED NOT OF NEWBORN |
|                                                                                   |                                     | 7843                  | APHASIA                             |
|                                                                                   |                                     | 78720                 | DYSPHAGIA UNSPECIFIED               |
|                                                                                   |                                     | 7877                  | ABNORMAL FECES                      |
|                                                                                   |                                     | 78939                 | ABD/PELV SWELL MASS/LUMP OTH SITE   |
|                                                                                   |                                     | 78959                 | OTHER ASCITES                       |
|                                                                                   |                                     | 86503                 | SPLEEN INJURY LAC EXTEND PARENCHYMA |
|                                                                                   |                                     | 86509                 | OTH SPLEEN INJR W/O OPN WND IN CAV  |
|                                                                                   |                                     | 9351                  | FOREIGN BODY IN ESOPHAGUS           |
|                                                                                   |                                     | 936                   | FOREIGN BODY IN INTESTINE AND COLON |
|                                                                                   |                                     | 99749                 | OTH DIGESTIVE SYSTEM COMPLICATIONS  |
| K223                                                                              | PERFORATION OF ESOPHAGUS            |                       |                                     |
| K279                                                                              | PU SITE UNS UNS AC/CHR NO HEM/PERF  |                       |                                     |
| K3189                                                                             | OTHER DISEASES STOMACH AND DUODENUM |                       |                                     |

| <b>Table A2: Component Diagnoses of Clinical Acute Care Categories, continued</b> |                                                                                           |                       |                                     |
|-----------------------------------------------------------------------------------|-------------------------------------------------------------------------------------------|-----------------------|-------------------------------------|
| <b>Category</b>                                                                   | <b>Clinical Grouping</b>                                                                  | <b>Diagnosis Code</b> | <b>Description</b>                  |
| Digestive System Diseases, continued                                              | Miscellaneous GI tract diagnoses, continued                                               | K565                  | INTEST ADHES W/OBST POSTPROC-INFECT |
|                                                                                   |                                                                                           | K611                  | RECTAL ABSCESS                      |
|                                                                                   |                                                                                           | K6289                 | OTHER SPEC DISEASES ANUS & RECTUM   |
|                                                                                   |                                                                                           | K631                  | PERFORATION INTESTINE NONTRAUMATIC  |
|                                                                                   |                                                                                           | K660                  | PERITONEAL ADHES POSTPROC POSTINF   |
|                                                                                   |                                                                                           | K913                  | POSTPROCEDUR INTESTINAL OBSTRUCTION |
|                                                                                   |                                                                                           | K9189                 | OTH POSTPROC COMP D/O DIGESTIVE SYS |
|                                                                                   |                                                                                           | K9589                 | OTH COMP OTH BARIATRIC PROC         |
|                                                                                   |                                                                                           | S36029A               | UNS CONTUSION SPLEEN INITIAL        |
|                                                                                   |                                                                                           | T18108A               | UNS FB ESOPH CAUS OTH INJ INIT ENC  |
|                                                                                   |                                                                                           | V551                  | PSGR TRUCK INJ COLL RW TRAIN NT ACC |
|                                                                                   |                                                                                           | V553                  | UNS OCC TRUCK INJ COLL TRAIN NT ACC |
|                                                                                   |                                                                                           | Z432                  | ENCOUNTER FOR ATTENTION ILEOSTOMY   |
|                                                                                   |                                                                                           | Z48815                | ENC SURG AFTRCARE FLW SURG DIGEST   |
|                                                                                   |                                                                                           | Z9884                 | BARIATRIC SURGERY STATUS            |
| Orthopedic or Rheumatologic Diagnoses                                             | Arthritis or surgery for DJD of the extremities (joint replacements or related diagnosis) | 71103                 | PYOGENIC ARTHRITIS, FOREARM         |
|                                                                                   |                                                                                           | 71509                 | GEN OSTEOARTHROSIS INVLV MX SITES   |
|                                                                                   |                                                                                           | 71515                 | PRIM LOC OSTEOARTHROS PELV RGN&THI  |
|                                                                                   |                                                                                           | 71525                 | SEC LOC OSTEOARTHROS PELV RGN&THI   |
|                                                                                   |                                                                                           | 71531                 | LOC OSTEOARTHROSIS-SHLDR REGION     |
|                                                                                   |                                                                                           | 71535                 | LOC OSTEOARTHROSIS-PELVIC RGN&THIGH |
|                                                                                   |                                                                                           | 71536                 | LOC OSTEOARTHROSIS-LOWER LEG        |
|                                                                                   |                                                                                           | 71589                 | OSTEOARTHROS-MX SITES-NOT SPEC GEN  |
|                                                                                   |                                                                                           | 71590                 | OSTEOARTHROS UNS GEN/LOC UNS SITE   |
|                                                                                   |                                                                                           | 71591                 | OSTEOARTHROS UNS GEN/LOC SHLDR RGN  |
|                                                                                   |                                                                                           | 71595                 | OSTORTHROS UNS GEN/LOC PELV REG&THI |
|                                                                                   |                                                                                           | 71596                 | OSTEOARTHROS UNSPEC GEN/LOC LOW LEG |
|                                                                                   |                                                                                           | 71691                 | UNSPEC ARTHROPATHY SHOULDER REGION  |
|                                                                                   |                                                                                           | 71697                 | UNSPECIFIED ARTHROPATHY ANKLE&FOOT  |
|                                                                                   |                                                                                           | 71699                 | UNSPEC ARTHROPATHY MULTIPLE SITES   |
|                                                                                   |                                                                                           | 71831                 | RECURRENT DISLOC SHOULDER JOINT     |
|                                                                                   |                                                                                           | 99641                 | MECHANICAL LOOSENING PROSTHETIC JNT |
|                                                                                   |                                                                                           | 99646                 | ARTICULAR BEARING WEAR PROSTH JNT   |
|                                                                                   |                                                                                           | 99647                 | OTH MECH COMPL PROSTH JOINT IMPLANT |
|                                                                                   |                                                                                           | 99677                 | OTH COMPS DUE INTRL JOINT PROSTH    |
|                                                                                   |                                                                                           | M160                  | BILATERAL PRIM OSTEOARTHRITIS HIP   |
|                                                                                   |                                                                                           | M1611                 | UNI PRIM OSTEOARTHRITIS RT HIP      |
|                                                                                   |                                                                                           | M1612                 | UNI PRIM OSTEOARTHRITIS LT HIP      |
| M167                                                                              | OTH UNI SEC OSTEOARTHRITIS HIP                                                            |                       |                                     |
| M170                                                                              | BILATERAL PRIM OSTEOARTHRITIS KNEE                                                        |                       |                                     |

| <b>Table A2: Component Diagnoses of Clinical Acute Care Categories, continued</b> |                                                                                                      |                                     |                                     |                                     |
|-----------------------------------------------------------------------------------|------------------------------------------------------------------------------------------------------|-------------------------------------|-------------------------------------|-------------------------------------|
| <b>Category</b>                                                                   | <b>Clinical Grouping</b>                                                                             | <b>Diagnosis Code</b>               | <b>Description</b>                  |                                     |
| Orthopedic or Rheumatologic Diagnoses, continued                                  | Arthritis or surgery for DJD of the extremities (joint replacements or related diagnosis), continued | M1710                               | UNI PRIM OSTEOARTHRITIS UNS KNEE    |                                     |
|                                                                                   |                                                                                                      | M1711                               | UNI PRIM OSTEOARTHRITIS RT KNEE     |                                     |
|                                                                                   |                                                                                                      | M1712                               | UNI PRIM OSTEOARTHRITIS LT KNEE     |                                     |
|                                                                                   |                                                                                                      | M179                                | OSTEOARTHRITIS OF KNEE UNSPECIFIED  |                                     |
|                                                                                   |                                                                                                      | M1990                               | UNSPECIFIED OSTEOARTHRITIS UNS SITE |                                     |
|                                                                                   |                                                                                                      | M960                                | PSEUDARTHROSIS AFTER FUS/ARTHRODSIS |                                     |
|                                                                                   |                                                                                                      | T84033A                             | MECH LOOS INT LT KNEE PROS JNT INIT |                                     |
|                                                                                   |                                                                                                      | T84092A                             | OTH MECH COMP INT RT KNEE PROS INIT |                                     |
|                                                                                   |                                                                                                      | V4365                               | KNEE JOINT REPLACEMENT OTHER MEANS  |                                     |
|                                                                                   |                                                                                                      | V5481                               | AFTERCARE FOLLOW JOINT REPLACEMENT  |                                     |
|                                                                                   |                                                                                                      | Z471                                | AFTERCARE FOLLOW JNT REPLACE SURG   |                                     |
|                                                                                   | Back or neck pain                                                                                    |                                     | 7231                                | CERVICALGIA                         |
|                                                                                   |                                                                                                      |                                     | 7241                                | PAIN IN THORACIC SPINE              |
|                                                                                   |                                                                                                      |                                     | 7242                                | LUMBAGO                             |
|                                                                                   |                                                                                                      |                                     | 7243                                | SCIATICA                            |
|                                                                                   |                                                                                                      |                                     | 7245                                | UNSPECIFIED BACKACHE                |
|                                                                                   |                                                                                                      |                                     | 7248                                | OTHER SYMPTOMS REFERABLE TO BACK    |
|                                                                                   |                                                                                                      |                                     | 8460                                | SPRAIN AND STRAIN OF LUMBOSACRAL    |
|                                                                                   |                                                                                                      |                                     | 8470                                | NECK SPRAIN AND STRAIN              |
|                                                                                   |                                                                                                      |                                     | 8471                                | THORACIC SPRAIN AND STRAIN          |
|                                                                                   |                                                                                                      |                                     | 8472                                | LUMBAR SPRAIN AND STRAIN            |
|                                                                                   |                                                                                                      |                                     | M5416                               | RADICULOPATHY LUMBAR REGION         |
|                                                                                   |                                                                                                      |                                     | M542                                | CERVICALGIA                         |
|                                                                                   |                                                                                                      |                                     | M5440                               | LUMBAGO WITH SCIATICA UNS SIDE      |
|                                                                                   |                                                                                                      |                                     | M5441                               | LUMBAGO WITH SCIATICA RIGHT SIDE    |
|                                                                                   |                                                                                                      |                                     | M5442                               | LUMBAGO WITH SCIATICA LEFT SIDE     |
|                                                                                   |                                                                                                      |                                     | M545                                | LOW BACK PAIN                       |
|                                                                                   |                                                                                                      |                                     | M546                                | PAIN IN THORACIC SPINE              |
|                                                                                   |                                                                                                      |                                     | M549                                | DORSALGIA UNSPECIFIED               |
|                                                                                   |                                                                                                      |                                     | M62830                              | MUSCLE SPASM OF BACK                |
|                                                                                   |                                                                                                      |                                     | S134XXA                             | SPRAIN LIG CERV SPINE INITIAL ENC   |
|                                                                                   |                                                                                                      |                                     | S139XXA                             | SPRAIN JNT LIG UNS PARTS NECK INIT  |
|                                                                                   |                                                                                                      |                                     | S161XXA                             | STRN MUSC FASC TENDON NECK LEVL INT |
|                                                                                   | S335XXA                                                                                              | SPRAIN LIGAMENTS LUMBAR SPN INITIAL |                                     |                                     |
|                                                                                   | S39012A                                                                                              | STRAIN MUSC FASC TENDON LW BACK INT |                                     |                                     |
|                                                                                   | Tendonitis, Bursitis, Joint effusion                                                                 |                                     | 72611                               | CALCIFIFYING TENDINITIS OF SHOULDER |
|                                                                                   |                                                                                                      |                                     | 72612                               | BICIPITAL TENOSYNOVITIS             |
|                                                                                   |                                                                                                      |                                     | 7265                                | ENTHESOPATHY OF HIP REGION          |
|                                                                                   |                                                                                                      |                                     | 72709                               | OTHER SYNOVITIS AND TENOSYNOVITIS   |
|                                                                                   |                                                                                                      |                                     | M7521                               | BICIPITAL TENDINITIS RIGHT SHOULDER |
|                                                                                   |                                                                                                      |                                     | 72610                               | UNSPEC D/O BURS&TEND SHLDR REGION   |
|                                                                                   |                                                                                                      |                                     | 7273                                | OTHER BURSITIS DISORDERS            |
|                                                                                   |                                                                                                      |                                     | M7041                               | PREPATELLAR BURSITIS RIGHT KNEE     |
| M7052                                                                             |                                                                                                      |                                     | OTHER BURSITIS OF KNEE LEFT KNEE    |                                     |
| 71903                                                                             |                                                                                                      |                                     | EFFUSION OF FOREARM JOINT           |                                     |
| 71906                                                                             |                                                                                                      |                                     | EFFUSION OF LOWER LEG JOINT         |                                     |
| 71909                                                                             |                                                                                                      |                                     | EFFUSION OF JOINT, MULTIPLE SITES   |                                     |
| M25461                                                                            |                                                                                                      |                                     | EFFUSION RIGHT KNEE                 |                                     |
| M25462                                                                            |                                                                                                      |                                     | EFFUSION LEFT KNEE                  |                                     |

| Table A2: Component Diagnoses of Clinical Acute Care Categories, continued |                   |                |                                     |
|----------------------------------------------------------------------------|-------------------|----------------|-------------------------------------|
| Category                                                                   | Clinical Grouping | Diagnosis Code | Description                         |
| Orthopedic or Rheumatologic Diagnoses, continued                           | Fracture          | 8052           | CLOS FX DORS VERT W/O SP CORD INJR  |
|                                                                            |                   | 8054           | CLOS FX LUMB VERT W/O SP CORD INJR  |
|                                                                            |                   | 8056           | CLOS FX SACRUM/COCCYX W/O CORD INJR |
|                                                                            |                   | 80700          | CLOSED FRACTURE OF RIB, UNSPECIFIED |
|                                                                            |                   | 80701          | CLOSED FRACTURE OF ONE RIB          |
|                                                                            |                   | 80702          | CLOSED FRACTURE OF TWO RIBS         |
|                                                                            |                   | 80709          | CLOS FRACTURE MULTIPLE RIBS UNSPEC  |
|                                                                            |                   | 81000          | UNSPEC PART CLOSED FRACTURE CLAV    |
|                                                                            |                   | 81001          | CLOSED FRACTURE STERNAL END CLAV    |
|                                                                            |                   | 81200          | CLOS FX UNSPEC PART UPPER END HUM   |
|                                                                            |                   | 81203          | CLOS FRACTURE GT TUBEROSITY HUMERUS |
|                                                                            |                   | 81209          | OTH CLOS FX UPPER END HUMERUS       |
|                                                                            |                   | 81220          | CLOSED FRACTURE UNSPEC PART HUMERUS |
|                                                                            |                   | 81221          | CLOSED FRACTURE OF SHAFT OF HUMERUS |
|                                                                            |                   | 81240          | CLOS FX UNSPEC PART LOW END HUM     |
|                                                                            |                   | 81241          | CLOS FRACTURE SUPRACONDYLAR HUMERUS |
|                                                                            |                   | 81243          | CLOS FRACTURE MEDIAL CONDYLE HUM    |
|                                                                            |                   | 81305          | CLOSED FRACTURE OF HEAD OF RADIUS   |
|                                                                            |                   | 81307          | OTH&UNSPEC CLOS FX PROX END RADIUS  |
|                                                                            |                   | 81341          | CLOSED COLLES FRACTURE              |
|                                                                            |                   | 81342          | OTH CLOS FRACTURES DIST END RADIUS  |
|                                                                            |                   | 81381          | CLOSED FRACTURE UNSPEC PART RADIUS  |
|                                                                            |                   | 81383          | CLOSED FRACTURE UNSPECIFIED PART RA |
|                                                                            |                   | 81400          | UNSPEC CLOSED FRACTURE CARPAL BONE  |
|                                                                            |                   | 81401          | CLOS FRACTURE NAVICULAR BONE WRIST  |
|                                                                            |                   | 81500          | CLOS FRACTURE MC BONE SITE UNSPEC   |
|                                                                            |                   | 81502          | CLOS FRACTURE BASE OTH MC BONE      |
|                                                                            |                   | 81504          | CLOS FRACTURE NECK METACARPAL BONE  |
|                                                                            |                   | 81600          | CLOS FX UNSPEC PHALNX/PHALANG HAND  |
|                                                                            |                   | 81601          | CLOS FX MID/PROX PHALNX/PHALANG HND |
|                                                                            |                   | 81602          | CLOS FX DIST PHALNX/PHALANG HAND    |
|                                                                            |                   | 81612          | OPEN FX DIST PHALNX/PHALANG HAND    |
|                                                                            |                   | 82020          | CLOS FX UNSPEC TROCH SECTION FEM    |
|                                                                            |                   | 82021          | CLOS FX INTERTROCH SECTION FEM      |
|                                                                            |                   | 82123          | CLOSED SUPRACONDYLAR FRACTURE FEMUR |
|                                                                            |                   | 82300          | CLOSED FRACTURE UPPER END TIBIA     |
|                                                                            |                   | 82302          | CLOS FRACTURE UPPER END FIB W/TIBIA |
|                                                                            |                   | 8242           | CLOSED FRACTURE LATERAL MALLEOLUS   |
|                                                                            |                   | 8244           | CLOSED BIMALLEOLAR FRACTURE         |
|                                                                            |                   | 8248           | UNSPECIFIED CLOSED FRACTURE ANKLE   |
|                                                                            |                   | 8250           | CLOSED FRACTURE OF CALCANEUS        |
|                                                                            |                   | 82521          | CLOSED FRACTURE OF ASTRAGALUS       |
|                                                                            |                   | 82525          | CLOSED FRACTURE OF METATARSAL BONE  |
|                                                                            |                   | 8260           | CLOS FRACTURE 1/MORE PHALANGES FOOT |
|                                                                            |                   | 8261           | OPEN FRACTURE 1/MORE PHALANGES FOOT |
|                                                                            |                   | 8270           | OTH MX&ILL-DEFINED CLOS FX LOW LIMB |
|                                                                            |                   | 83100          | CLOS DISLOC SHOULDER UNSPEC SITE    |



| <b>Table A2: Component Diagnoses of Clinical Acute Care Categories, continued</b> |                          |                       |                                     |                        |                                   |
|-----------------------------------------------------------------------------------|--------------------------|-----------------------|-------------------------------------|------------------------|-----------------------------------|
| <b>Category</b>                                                                   | <b>Clinical Grouping</b> | <b>Diagnosis Code</b> | <b>Description</b>                  |                        |                                   |
| Orthopedic or Rheumatologic Diagnoses, continued                                  | Fracture, continued      | 83101                 | CLOSED ANTERIOR DISLOCATION HUMERUS |                        |                                   |
|                                                                                   |                          | 83104                 | CLOSED DISLOCATION AC               |                        |                                   |
|                                                                                   |                          | S22088A               | OTH FX T11-T12 VERT INITIAL CLOS FX |                        |                                   |
|                                                                                   |                          | S2221XA               | FX MANUBRIUM INITIAL CLOS FRACTURE  |                        |                                   |
|                                                                                   |                          | S2232XA               | FX 1 RIB LT SIDE INITIAL CLOS FX    |                        |                                   |
|                                                                                   |                          | S32038A               | OTH FX THIRD LUMB VERT INIT CLOS FX |                        |                                   |
|                                                                                   |                          | S3210XA               | UNS FX SACRUM INITIAL CLOS FRACTURE |                        |                                   |
|                                                                                   |                          | S322XXA               | FX COCCYX INITIAL CLOS FRACTURE     |                        |                                   |
|                                                                                   |                          | S42022A               | DSPL FX SHFT LT CLAV INIT CLOS FX   |                        |                                   |
|                                                                                   |                          | S42192A               | FX OTH PRT SCAP LT SHLD INIT CLO FX |                        |                                   |
|                                                                                   |                          | S52502A               | UNS FX LOW LT RADIUS INIT CLOS FX   |                        |                                   |
|                                                                                   |                          | S62311A               | DSPL FX B 2ND MC BN LH INT CLOS FX  |                        |                                   |
|                                                                                   |                          | S62606A               | FX UNS PHAL RT LF INIT CLOS FX      |                        |                                   |
|                                                                                   |                          | S62617A               | DSPL FX PROX PHAL LT LF INIT CLO FX |                        |                                   |
|                                                                                   |                          | S62647A               | NDSPLC FX PROX PHAL LT LF INIT CLO  |                        |                                   |
|                                                                                   |                          | S6292XA               | UNS FX LT WRST HAND INITIAL CLOS FX |                        |                                   |
|                                                                                   |                          | S72114A               | NDSPLC FX GT TROCH RT FEM INIT CLO  |                        |                                   |
|                                                                                   |                          | S82111A               | DSPL FX RT TIB SPINE INIT CLOS FX   |                        |                                   |
|                                                                                   |                          | S82141A               | DSPL BICONDYLAR FX RT TIB INIT CLO  |                        |                                   |
|                                                                                   |                          | S82142A               | DSPL BICONDYLAR FX LT TIB INIT CLO  |                        |                                   |
|                                                                                   |                          | S82401A               | UNS FX SHFT RT FIB INITIAL CLOS FX  |                        |                                   |
|                                                                                   |                          | S82409A               | UNS FX SHFT UNS FIB INITIAL CLOS FX |                        |                                   |
|                                                                                   |                          | S82821A               | TORUS FX LOW RT FIB INITIAL CLOS FX |                        |                                   |
|                                                                                   |                          | S82831A               | OTH FX UP LOW RT FIB INIT CLOS FX   |                        |                                   |
|                                                                                   |                          | S82839A               | OTH FX UP LOW UNS FIB INIT CLOS FX  |                        |                                   |
|                                                                                   |                          | S82891A               | OTH FX RT LOWER LEG INITIAL CLOS FX |                        |                                   |
|                                                                                   |                          | S92352A               | DSPL FX 5TH MT BN LT FT INIT CLO FX |                        |                                   |
|                                                                                   |                          | V5423                 | AFTERCARE HEALING PATH FRACTURE HIP |                        |                                   |
|                                                                                   |                          |                       | Lower extremity pain                | 71945                  | PAIN IN JOINT PELVIC REGION&THIGH |
|                                                                                   |                          |                       |                                     | 71946                  | PAIN IN JOINT, LOWER LEG          |
|                                                                                   |                          |                       |                                     | 71947                  | PAIN IN JOINT, ANKLE AND FOOT     |
|                                                                                   |                          |                       |                                     | M25561                 | PAIN IN RIGHT KNEE                |
|                                                                                   |                          |                       |                                     | M25562                 | PAIN IN LEFT KNEE                 |
|                                                                                   |                          |                       |                                     | M25569                 | PAIN IN UNSPECIFIED KNEE          |
|                                                                                   |                          |                       |                                     | M79604                 | PAIN IN RIGHT LEG                 |
|                                                                                   |                          |                       |                                     | M79605                 | PAIN IN LEFT LEG                  |
|                                                                                   |                          |                       |                                     | M79651                 | PAIN IN RIGHT THIGH               |
|                                                                                   |                          |                       |                                     | M79661                 | PAIN IN RIGHT LOWER LEG           |
|                                                                                   |                          |                       | M79662                              | PAIN IN LEFT LOWER LEG |                                   |

| <b>Table A2: Component Diagnoses of Clinical Acute Care Categories, continued</b> |                                                                 |                                   |                                     |
|-----------------------------------------------------------------------------------|-----------------------------------------------------------------|-----------------------------------|-------------------------------------|
| <b>Category</b>                                                                   | <b>Clinical Grouping</b>                                        | <b>Diagnosis Code</b>             | <b>Description</b>                  |
| Orthopedic or Rheumatologic Diagnoses, continued                                  | Upper extremity pain                                            | 71941                             | PAIN IN JOINT, SHOULDER REGION      |
|                                                                                   |                                                                 | 71942                             | PAIN IN JOINT, UPPER ARM            |
|                                                                                   |                                                                 | 71943                             | PAIN IN JOINT, FOREARM              |
|                                                                                   |                                                                 | 71944                             | PAIN IN JOINT, HAND                 |
|                                                                                   |                                                                 | M25511                            | PAIN IN RIGHT SHOULDER              |
|                                                                                   |                                                                 | M25512                            | PAIN IN LEFT SHOULDER               |
|                                                                                   |                                                                 | M25521                            | PAIN IN RIGHT ELBOW                 |
|                                                                                   |                                                                 | M25522                            | PAIN IN LEFT ELBOW                  |
|                                                                                   |                                                                 | M25531                            | PAIN IN RIGHT WRIST                 |
|                                                                                   |                                                                 | M7542                             | IMPINGEMENT SYNDROME LEFT SHOULDER  |
|                                                                                   |                                                                 | M79631                            | PAIN IN RIGHT FOREARM               |
|                                                                                   | Rheumatologic condition (e.g. SLE, Rheumatoid arthritis, Gout)  | 135                               | SARCOIDOSIS                         |
|                                                                                   |                                                                 | 27401                             | ACUTE GOUTY ARTHROPATHY             |
|                                                                                   |                                                                 | 7100                              | SYSTEMIC LUPUS ERYTHEMATOSUS        |
|                                                                                   |                                                                 | 7140                              | RHEUMATOID ARTHRITIS                |
|                                                                                   |                                                                 | M329                              | SYSTEMIC LUPUS ERYTHEMATOSUS UNS    |
|                                                                                   |                                                                 | 2749                              | GOUT, UNSPECIFIED                   |
|                                                                                   |                                                                 | M10072                            | IDIOPATHIC GOUT LEFT ANKLE AND FOOT |
|                                                                                   |                                                                 | M109                              | GOUT UNSPECIFIED                    |
|                                                                                   | Sprain or strain of the extremity (excluding neck/back strains) | 8360                              | TEAR MED CART/MENISCUS KNEE CURRENT |
|                                                                                   |                                                                 | 8401                              | CORACOCALVICULAR SPRAIN AND STRAIN  |
|                                                                                   |                                                                 | 8404                              | ROTATOR CUFF SPRAIN AND STRAIN      |
|                                                                                   |                                                                 | 8408                              | SPRAIN&STRN OTH SITE SHLDR&UP ARM   |
|                                                                                   |                                                                 | 8409                              | SPRAIN&STRAIN UNS SITE SHLDR&UP ARM |
|                                                                                   |                                                                 | 8419                              | SPRAIN&STRAIN UNS SITE ELB&FORARM   |
|                                                                                   |                                                                 | 84200                             | SPRAIN&STRAIN UNSPEC SITE WRIST     |
|                                                                                   |                                                                 | 84209                             | OTHER WRIST SPRAIN AND STRAIN       |
|                                                                                   |                                                                 | 84210                             | SPRAIN&STRAIN UNSPECIFIED SITE HAND |
|                                                                                   |                                                                 | 8438                              | SPRAIN&STRAIN OTH SPEC SITE HIP&THI |
|                                                                                   |                                                                 | 8439                              | SPRAIN&STRAIN UNSPEC SITE HIP&THIGH |
|                                                                                   |                                                                 | 8441                              | SPRAIN AND STRAIN OF MCL OF KNEE    |
|                                                                                   |                                                                 | 8448                              | SPRAIN&STRN OTH SPEC SITE KNEE&LEG  |
|                                                                                   |                                                                 | 8449                              | SPRAIN&STRAIN UNSPEC SITE KNEE&LEG  |
|                                                                                   |                                                                 | 84500                             | UNSPEC SITE ANKLE SPRAIN&STRAIN     |
|                                                                                   |                                                                 | 84510                             | SPRAIN&STRAIN UNSPECIFIED SITE FOOT |
|                                                                                   |                                                                 | 8469                              | UNS SITE SACROIL RGN SPRAIN&STRAIN  |
|                                                                                   |                                                                 | 8474                              | SPRAIN AND STRAIN OF COCCYX         |
|                                                                                   |                                                                 | 8479                              | SPRAIN&STRAIN UNSPECIFIED SITE BACK |
|                                                                                   |                                                                 | 8481                              | SPRAIN AND STRAIN OF JAW            |
|                                                                                   | 8483                                                            | SPRAIN AND STRAIN OF RIBS         |                                     |
|                                                                                   | 8489                                                            | UNSPECIFIED SITE OF SPRAIN&STRAIN |                                     |

| Table A2: Component Diagnoses of Clinical Acute Care Categories, continued |                                                                            |                                    |                                     |
|----------------------------------------------------------------------------|----------------------------------------------------------------------------|------------------------------------|-------------------------------------|
| Category                                                                   | Clinical Grouping                                                          | Diagnosis Code                     | Description                         |
| Orthopedic or Rheumatologic Diagnoses, continued                           | Sprain or strain of the extremity (excluding neck/back strains), continued | S29002A                            | UNS INJ MSC TEND BACK WALL TH INIT  |
|                                                                            |                                                                            | S43401A                            | UNS SPRAIN RT SHOULDER JOINT INIT   |
|                                                                            |                                                                            | S43402A                            | UNS SPRAIN LT SHOULDER JOINT INIT   |
|                                                                            |                                                                            | S46811A                            | STRN OTH MSC F TEND SH UA RA INIT   |
|                                                                            |                                                                            | S46912A                            | STRN UNS MSC F TND SHLDR UA LA INIT |
|                                                                            |                                                                            | S63501A                            | UNSPECIFIED SPRAIN RT WRIST INITIAL |
|                                                                            |                                                                            | S63613A                            | UNS SPRAIN LT MIDDLE FINGER INITIAL |
|                                                                            |                                                                            | S63650A                            | SPRAIN MCP JOINT RT INDX FINGER INT |
|                                                                            |                                                                            | S73101A                            | UNSPECIFIED SPRAIN RT HIP INITIAL   |
|                                                                            |                                                                            | S76012A                            | STRAIN MUSC FASC TENDON LT HIP INIT |
|                                                                            |                                                                            | S83421A                            | SPRAIN LCL RIGHT KNEE INITIAL ENC   |
|                                                                            |                                                                            | S8390XA                            | SPRAIN UNS SITE UNS KNEE INITIAL    |
|                                                                            |                                                                            | S8391XA                            | SPRAIN UNS SITE RT KNEE INITIAL     |
|                                                                            |                                                                            | S8392XA                            | SPRAIN UNS SITE LT KNEE INITIAL     |
|                                                                            |                                                                            | S86111A                            | STRAIN OTH M&T POST LOW RT LEG INIT |
|                                                                            |                                                                            | S86811A                            | STRAIN OTH MSC TEND LOW RT LEG INIT |
|                                                                            |                                                                            | S93401A                            | SPRAIN UNS LIGAMENT RT ANKLE INIT   |
|                                                                            |                                                                            | S93402A                            | SPRAIN UNS LIGAMENT LT ANKLE INIT   |
|                                                                            |                                                                            | S93431A                            | SPRAIN TIBIOFIBULAR LIG RT ANK INIT |
|                                                                            |                                                                            | S93601A                            | UNSPECIFIED SPRAIN RT FOOT INITIAL  |
|                                                                            | S93602A                                                                    | UNSPECIFIED SPRAIN LT FOOT INITIAL |                                     |
|                                                                            | S93621A                                                                    | SPRAIN TMT LIGAMENT RT FOOT INIT   |                                     |
|                                                                            | Diagnoses of the spinal column or spinal cord                              | 7210                               | CERV SPONDYLOSIS WITHOUT MYELOPATHY |
|                                                                            |                                                                            | 7211                               | CERVICAL SPONDYLOSIS W/MYELOPATHY   |
|                                                                            |                                                                            | 7213                               | LUMBOSAC SPONDYLOSIS W/O MYELOPATHY |
|                                                                            |                                                                            | 7220                               | DISPLCMT CERV DISC W/O MYELOPATHY   |
|                                                                            |                                                                            | 72210                              | DISPLCMT LUMBAR DISC W/O MYELOPATHY |
|                                                                            |                                                                            | 7222                               | DSPLCMT DISC SITE UNS W/O MYELOPTHY |
|                                                                            |                                                                            | 7224                               | DEGEN CERV INTERVERTEBRAL DISC      |
|                                                                            |                                                                            | 72252                              | DEGEN LUMB/LUMBOSAC INTERVERT DISC  |
|                                                                            |                                                                            | 72271                              | INTERVERT CERV DISC D/O-MYELOPATHY  |
|                                                                            |                                                                            | 72283                              | POSTLAMINECT SYNDROME LUMBAR REGION |
|                                                                            |                                                                            | 7238                               | OTH SYNDROMES AFFECT CERV REGION    |
|                                                                            |                                                                            | 72402                              | SPINAL STEN LUMB W/O NEUROGEN CLAUD |
|                                                                            |                                                                            | 72403                              | SPINAL STENOS LUMB NEUROGEN CLAUD   |
|                                                                            |                                                                            | 7244                               | THOR/LUMBOSACRL NURIT/RADICULIT UNS |
|                                                                            |                                                                            | 73710                              | KYPHOSIS ACQUIRED POSTURAL          |
|                                                                            |                                                                            | 7384                               | ACQUIRED SPONDYLOLISTHESIS          |
|                                                                            |                                                                            | 75612                              | CONGENITAL SPONDYLOLISTHESIS        |
|                                                                            |                                                                            | M4316                              | SPONDYLOLISTHESIS LUMBAR REGION     |
|                                                                            |                                                                            | M4317                              | SPONDYLOLISTHESIS LUMBOSACRAL RGN   |
|                                                                            |                                                                            | M4624                              | OSTEOMYELITIS VERTEBRA THORACIC RGN |
|                                                                            |                                                                            | M4646                              | DISCITIS UNSPECIFIED LUMBAR REGION  |
|                                                                            |                                                                            | M4716                              | OTH SPONDYLOSIS W/MYELOPATHY LUMB   |
|                                                                            |                                                                            | M47812                             | SPONDYLS W/O MYELO-/RADICULOP CERV  |
|                                                                            |                                                                            | M47816                             | SPONDYLS W/O MYELO-/RADICULOP LUMB  |
|                                                                            |                                                                            | M479                               | SPONDYLOSIS UNSPECIFIED             |

| Table A2: Component Diagnoses of Clinical Acute Care Categories, continued |                                                                                               |                                                     |                                     |
|----------------------------------------------------------------------------|-----------------------------------------------------------------------------------------------|-----------------------------------------------------|-------------------------------------|
| Category                                                                   | Clinical Grouping                                                                             | Diagnosis Code                                      | Description                         |
| Orthopedic or Rheumatologic Diagnoses, continued                           | Diagnoses of the spinal column or spinal cord, continued                                      | M4800                                               | SPINAL STENOSIS SITE UNSPECIFIED    |
|                                                                            |                                                                                               | M4802                                               | SPINAL STENOSIS CERVICAL REGION     |
|                                                                            |                                                                                               | M4806                                               | SPINAL STENOSIS LUMBAR REGION       |
|                                                                            |                                                                                               | M5002                                               | CERV DISC D/O W/MYELOPATHY MID-CERV |
|                                                                            |                                                                                               | M50022                                              | CERV DISC D/O C5-C6 LVL MYELOPATHY  |
|                                                                            |                                                                                               | M50122                                              | CERVICAL DISC DISORDER C5-C6 LVL RP |
|                                                                            |                                                                                               | M5020                                               | OTH CERV DISC DISPLACEMENT UNS CERV |
|                                                                            |                                                                                               | M50223                                              | OTH CERVICAL DISC DISPL C6-C7 LEVEL |
|                                                                            |                                                                                               | M50322                                              | OTHER CERVICAL DISC DEG C5-C6 LEVEL |
|                                                                            |                                                                                               | M5116                                               | IV DISC D/O W/RADICULOPATHY LUMB    |
|                                                                            |                                                                                               | M5117                                               | IV DISC D/O W/RADICULOPATHY LS RGN  |
|                                                                            |                                                                                               | M5126                                               | OTH IV DISC DISPLACEMENT LUMBAR RGN |
|                                                                            |                                                                                               | M5136                                               | OTH IV DISC DEGEN LUMBAR REGION     |
|                                                                            |                                                                                               | M5412                                               | RADICULOPATHY CERVICAL REGION       |
|                                                                            |                                                                                               | S14101D                                             | UNS INJURY C1 LEVEL C-SPN CORD SUB  |
|                                                                            |                                                                                               | Miscellaneous orthopedic or rheumatologic diagnosis | 725                                 |
|                                                                            | 72691                                                                                         |                                                     | EXOSTOSIS OF UNSPECIFIED SITE       |
|                                                                            | 73008                                                                                         |                                                     | ACUTE OSTEOMYELITIS OTHER SPEC SITE |
|                                                                            | 73819                                                                                         |                                                     | OTHER SPEC ACQUIRED DEFORMITY HEAD  |
|                                                                            | 9273                                                                                          |                                                     | CRUSHING INJURY OF FINGER           |
|                                                                            | 99667                                                                                         |                                                     | INF&INFLAM REACT INT ORTH DEVICE    |
|                                                                            | M2392                                                                                         |                                                     | UNS INTERNAL DERANGEMENT LEFT KNEE  |
|                                                                            | M6281                                                                                         |                                                     | MUSCLE WEAKNESS GENERALIZED         |
|                                                                            | M7122                                                                                         |                                                     | SYNOVIAL CYST POP SPACE LEFT KNEE   |
|                                                                            | M779                                                                                          |                                                     | ENTHESOPATHY UNSPECIFIED            |
|                                                                            | M797                                                                                          |                                                     | FIBROMYALGIA                        |
|                                                                            | S67192A                                                                                       | CRUSHING INJURY RT MID FINGER INIT                  |                                     |
| Vascular, cardiovascular and cerebrovascular diseases                      | Acute coronary syndromes, Coronary Artery Disease, Cardiac Arrest or Congestive heart failure | 41011                                               | ACUT MI OTH ANT WALL INIT EPIS CARE |
|                                                                            |                                                                                               | 41040                                               | ACUT MI OTH INF WALL EPIS CARE UNS  |
|                                                                            |                                                                                               | 41041                                               | ACUT MI OTH INF WALL INIT EPIS CARE |
|                                                                            |                                                                                               | 41071                                               | ACUT MI SUBNDOCRDL INFARCT INIT EOC |
|                                                                            |                                                                                               | 4111                                                | INTERMEDIATE CORONARY SYNDROME      |
|                                                                            |                                                                                               | 41401                                               | COR ATHEROSLERO NATIVE COR ART      |
|                                                                            |                                                                                               | 4275                                                | CARDIAC ARREST                      |
|                                                                            |                                                                                               | I200                                                | UNSTABLE ANGINA                     |
|                                                                            |                                                                                               | I214                                                | NON-ST ELEVATION MYOCARDIAL INFARCT |
|                                                                            |                                                                                               | I2510                                               | ASHD NATIVE CA W/O ANGINA PECTORIS  |
|                                                                            |                                                                                               | I25118                                              | ASHD NATIVE CA W/OTH FORMS AP       |
|                                                                            |                                                                                               | I25119                                              | ASHD NATIV CA W/UNS ANGINA PECTORIS |
|                                                                            |                                                                                               | I469                                                | CARDIAC ARREST CAUSE UNSPECIFIED    |

| <b>Table A2: Component Diagnoses of Clinical Acute Care Categories, continued</b> |                                                                                                          |                                     |                                     |                                     |
|-----------------------------------------------------------------------------------|----------------------------------------------------------------------------------------------------------|-------------------------------------|-------------------------------------|-------------------------------------|
| <b>Category</b>                                                                   | <b>Clinical Grouping</b>                                                                                 | <b>Diagnosis Code</b>               | <b>Description</b>                  |                                     |
| Vascular, cardiovascular and cerebrovascular diseases, continued                  | Acute coronary syndromes, Coronary Artery Disease, Cardiac Arrest or Congestive heart failure, continued | 40291                               | HTN HRT DISEASE UNSPEC W/HRT FAIL   |                                     |
|                                                                                   |                                                                                                          | 40491                               | HTN H & CKD UNS HF&CKD ST I-IV/UNS  |                                     |
|                                                                                   |                                                                                                          | 4280                                | CHF UNSPECIFIED                     |                                     |
|                                                                                   |                                                                                                          | I110                                | HTN HEART DISEASE W/HEART FAIL      |                                     |
|                                                                                   |                                                                                                          | I132                                | HTN HRT CKD W/HF W/STAGE 5 CKD/ESRD |                                     |
|                                                                                   |                                                                                                          | Cardiac dysrhythmias & palpitations | 42611                               | FIRST DEGREE ATRIOVENTRICULAR BLOCK |
|                                                                                   | 4271                                                                                                     |                                     | PAROXYSMAL VENTRICULAR TACHYCARDIA  |                                     |
|                                                                                   | 42731                                                                                                    |                                     | ATRIAL FIBRILLATION                 |                                     |
|                                                                                   | 42781                                                                                                    |                                     | SINOATRIAL NODE DYSFUNCTION         |                                     |
|                                                                                   | 42789                                                                                                    |                                     | OTHER SPEC CARDIAC DYSRHYTHMIAS     |                                     |
|                                                                                   | 4279                                                                                                     |                                     | UNSPECIFIED CARDIAC DYSRHYTHMIA     |                                     |
|                                                                                   | 7850                                                                                                     |                                     | UNSPECIFIED TACHYCARDIA             |                                     |
|                                                                                   | 7851                                                                                                     |                                     | PALPITATIONS                        |                                     |
|                                                                                   | I471                                                                                                     |                                     | SUPRAVENTRICULAR TACHYCARDIA        |                                     |
|                                                                                   | I480                                                                                                     |                                     | PAROXYSMAL ATRIAL FIBRILLATION      |                                     |
|                                                                                   | I4891                                                                                                    |                                     | UNSPECIFIED ATRIAL FIBRILLATION     |                                     |
|                                                                                   | I4901                                                                                                    |                                     | VENTRICULAR FIBRILLATION            |                                     |
|                                                                                   | I498                                                                                                     |                                     | OTHER SPECIFIED CARDIAC ARRHYTHMIAS |                                     |
|                                                                                   | R000                                                                                                     |                                     | TACHYCARDIA UNSPECIFIED             |                                     |
|                                                                                   | R001                                                                                                     |                                     | BRADYCARDIA UNSPECIFIED             |                                     |
|                                                                                   | R002                                                                                                     |                                     | PALPITATIONS                        |                                     |
|                                                                                   | R008                                                                                                     |                                     | OTHER ABNORMALITIES OF HEART BEAT   |                                     |
|                                                                                   | Chest Pain & Angina                                                                                      |                                     | 4131                                | PRINZMETAL ANGINA                   |
|                                                                                   |                                                                                                          |                                     | 4139                                | OTHER&UNSPECIFIED ANGINA PECTORIS   |
|                                                                                   |                                                                                                          | 78650                               | CHEST PAIN UNSPECIFIED              |                                     |
|                                                                                   |                                                                                                          | 78651                               | PRECORDIAL PAIN                     |                                     |
|                                                                                   |                                                                                                          | 78659                               | OTHER CHEST PAIN                    |                                     |
|                                                                                   |                                                                                                          | I201                                | ANGINA PECTORIS W/DOCUMENTED SPASM  |                                     |
|                                                                                   |                                                                                                          | R072                                | PRECORDIAL PAIN                     |                                     |
|                                                                                   |                                                                                                          | R0789                               | OTHER CHEST PAIN                    |                                     |
|                                                                                   |                                                                                                          | R079                                | CHEST PAIN UNSPECIFIED              |                                     |
|                                                                                   | Hypertension & hypertension-mediated disease                                                             | 4010                                | ESSENTIAL HYPERTENSION, MALIGNANT   |                                     |
|                                                                                   |                                                                                                          | 4019                                | UNSPECIFIED ESSENTIAL HYPERTENSION  |                                     |
|                                                                                   |                                                                                                          | 40391                               | HTN CKD UNSPEC W/CKD STAGE V/ESRD   |                                     |
|                                                                                   |                                                                                                          | 40501                               | SEC RENOVASCULAR HYPERTENSION MALIG |                                     |
|                                                                                   |                                                                                                          | 4372                                | HYPERTENSIVE ENCEPHALOPATHY         |                                     |
|                                                                                   |                                                                                                          | 7962                                | ELEVDP BP READING WITHOUT DX HTN    |                                     |
|                                                                                   |                                                                                                          | I10                                 | ESSENTIAL PRIMARY HYPERTENSION      |                                     |
|                                                                                   |                                                                                                          | I120                                | HYPERTENSIVE CKD W/STAGE 5 CKD/ESRD |                                     |
|                                                                                   |                                                                                                          | I160                                | HYPERTENSIVE URGENCY                |                                     |

| Table A2: Component Diagnoses of Clinical Acute Care Categories, continued |                                                                |                                                                        |                                     |
|----------------------------------------------------------------------------|----------------------------------------------------------------|------------------------------------------------------------------------|-------------------------------------|
| Category                                                                   | Clinical Grouping                                              | Diagnosis Code                                                         | Description                         |
| Vascular, cardiovascular and cerebrovascular diseases, continued           | Stroke, Ischemic & Hemorrhagic, and Transient Ischemic Attacks | 4329                                                                   | UNSPECIFIED INTRACRANIAL HEMORRHAGE |
|                                                                            |                                                                | 43401                                                                  | CEREBRAL THROMBOSIS W/INFARCT       |
|                                                                            |                                                                | 43411                                                                  | CEREBRAL EMBOLISM W/INFARCT         |
|                                                                            |                                                                | 43491                                                                  | UNSPEC CERBRL ART OCCL W/INFARCT    |
|                                                                            |                                                                | 4359                                                                   | UNSPEC TRANSIENT CEREBRAL ISCHEMIA  |
|                                                                            |                                                                | 436                                                                    | ACUT BUT ILL-DEFINED CEREBRVASC DZ  |
|                                                                            |                                                                | 4377                                                                   | TRANSIENT GLOBAL AMNESIA            |
|                                                                            |                                                                | 43885                                                                  | VERTIGO AS LATE EFF CEREBRVASC DZ   |
|                                                                            |                                                                | G459                                                                   | TRANS CERBRAL ISCHEMIC ATTACK UNS   |
|                                                                            |                                                                | I63411                                                                 | CEREB INFARCT EMBO RT MID CEREB ART |
|                                                                            |                                                                | I639                                                                   | CEREBRAL INFARCTION UNSPECIFIED     |
|                                                                            |                                                                | I69365                                                                 | OTH PARLYT SYND CEREB INFARCT BIL   |
|                                                                            |                                                                | Venous thromboembolism, non-cerebral thrombosis, or pulmonary embolism | 41511                               |
|                                                                            | 41519                                                          |                                                                        | OTH PULMONARY EMBOLISM&INFARCTION   |
|                                                                            | 45340                                                          |                                                                        | AC VNUS EMB&THRMB UNS DP VES LW EXT |
|                                                                            | 45341                                                          |                                                                        | AC VNUS EMB&THRMB DP VES PRX LW EXT |
|                                                                            | 45342                                                          |                                                                        | AC VNUS EMB&THRMB DP VES DST LW EXT |
|                                                                            | 45350                                                          |                                                                        | CHRN V EMB&THRMB UNS DP VES LW EXT  |
|                                                                            | 45381                                                          |                                                                        | ACUT VNUS EMB&THROMB SUP VNS UP EXT |
|                                                                            | 45385                                                          |                                                                        | ACUT VNUS EMBO&THROMB SUBCLAV VEINS |
|                                                                            | 45389                                                          |                                                                        | ACUT VENUS EMB&THRMB OTH SPEC VEINS |
|                                                                            | I2699                                                          |                                                                        | OTH PULM EMBO W/O AC COR PULMONALE  |
|                                                                            | I82401                                                         |                                                                        | AC EMBO THROMB UNS DP VNS RT LW EXT |
|                                                                            | I82409                                                         |                                                                        | AC EMBO THROMB UNS DP VN UNS LW EXT |
|                                                                            | I82412                                                         |                                                                        | ACUTE EMBO THROMBOS LT FEMORAL VEIN |
|                                                                            | I82492                                                         |                                                                        | AC EMBO THROMB OTH DP VN LT LOW EXT |
|                                                                            | I82531                                                         |                                                                        | CHRON EMBO THROMB RT POPLITEAL VEIN |
|                                                                            | T82868A                                                        |                                                                        | THROMB DT VAS PROS DEV IMPL GFT INT |
|                                                                            | Miscellaneous cardiovascular diagnoses                         |                                                                        | 2127                                |
|                                                                            |                                                                | 4149                                                                   | UNSPEC CHRONIC ISCHEMIC HRT DISEASE |
|                                                                            |                                                                | 42090                                                                  | UNSPECIFIED ACUTE PERICARDITIS      |
|                                                                            |                                                                | 42091                                                                  | ACUTE IDIOPATHIC PERICARDITIS       |
|                                                                            |                                                                | 42291                                                                  | IDIOPATHIC MYOCARDITIS              |
|                                                                            |                                                                | 4240                                                                   | MITRAL VALVE DISORDERS              |
|                                                                            |                                                                | 4241                                                                   | AORTIC VALVE DISORDERS              |
|                                                                            |                                                                | 4293                                                                   | CARDIOMEGALY                        |
|                                                                            |                                                                | 42989                                                                  | OTHER ILL-DEFINED HEART DISEASE     |
|                                                                            |                                                                | 43310                                                                  | OCCL&STENOS CAROTID ART W/O INFARCT |
|                                                                            |                                                                | 4373                                                                   | CEREBRAL ANEURYSM, NONRUPTURED      |
|                                                                            |                                                                | 4510                                                                   | PHLEBITIS&THROMBO SUP VES LWR EXTRM |
|                                                                            |                                                                | 4512                                                                   | PHLEBITIS&THROMBOPHLEB LW EXTRM UNS |
|                                                                            |                                                                | 45182                                                                  | PHLEBITIS&THROMBO SUP VNS UP EXTREM |
|                                                                            |                                                                | 45184                                                                  | PHLEBITIS&THROMBOPHLEB UP EXTRM UNS |
|                                                                            |                                                                | 45189                                                                  | PHLEBITIS&THROMBOPHLEBITIS OTH SITE |
|                                                                            |                                                                | 4519                                                                   | PHLEBITIS&THROMBOPHLEB UNSPEC SITE  |
| 4548                                                                       |                                                                | VARICOSE VNS LOW EXTREM W/OTH COMPS                                    |                                     |
| 4549                                                                       |                                                                | ASYMPTOMATIC VARICOSE VEINS                                            |                                     |
| 4580                                                                       |                                                                | ORTHOSTATIC HYPOTENSION                                                |                                     |

| Table A2: Component Diagnoses of Clinical Acute Care Categories, continued |                                                   |                                     |                                     |                                    |
|----------------------------------------------------------------------------|---------------------------------------------------|-------------------------------------|-------------------------------------|------------------------------------|
| Category                                                                   | Clinical Grouping                                 | Diagnosis Code                      | Description                         |                                    |
| Vascular, cardiovascular and cerebrovascular diseases, continued           | Miscellaneous cardiovascular diagnoses, continued | 45829                               | OTHER IATROGENIC HYPOTENSION        |                                    |
|                                                                            |                                                   | 4588                                | OTHER SPECIFIED HYPOTENSION         |                                    |
|                                                                            |                                                   | 4589                                | UNSPECIFIED HYPOTENSION             |                                    |
|                                                                            |                                                   | 7464                                | CONGEN INSUFFICIENCY AORTIC VALVE   |                                    |
|                                                                            |                                                   | 74781                               | CONGEN ANOMALY CEREBRVASC SYSTEM    |                                    |
|                                                                            |                                                   | 7852                                | UNDIAGNOSED CARDIAC MURMURS         |                                    |
|                                                                            |                                                   | 79431                               | NONSPECIFIC ABNORMAL ECG            |                                    |
|                                                                            |                                                   | 9009                                | INJURY UNSPEC BLD VESSEL HEAD&NECK  |                                    |
|                                                                            |                                                   | 9961                                | MECH COMP OTH VASC DEVICE IMPL&GFT  |                                    |
|                                                                            |                                                   | 9971                                | CARDIAC COMPLICATIONS NEC           |                                    |
|                                                                            |                                                   | 9972                                | PERIPHERL VASCULR COMPLICATION NEC  |                                    |
|                                                                            |                                                   | 99779                               | VASCULAR COMPLICATIONS OTH VESSELS  |                                    |
|                                                                            |                                                   | 99931                               | COMP MEDICAL CARE NEC INF DUE CVC   |                                    |
|                                                                            |                                                   | I25810                              | ATS CA BP GRAFT NO ANGINA PECTORIS  |                                    |
|                                                                            |                                                   | I300                                | AC NONSPECIFIC IDIOPATH PERICARDIT  |                                    |
|                                                                            |                                                   | I341                                | NONRHEUMATIC MITRAL VALVE PROLAPSE  |                                    |
|                                                                            |                                                   | I671                                | CEREBRAL ANEURYSM NONRUPTURED       |                                    |
|                                                                            |                                                   | I713                                | ABDOMINAL AORTIC ANEURYSM RUPTURED  |                                    |
|                                                                            |                                                   | I8390                               | ASYMPTOMATIC VARICOS VNS UNS LW EXT |                                    |
|                                                                            |                                                   | I951                                | ORTHOSTATIC HYPOTENSION             |                                    |
|                                                                            |                                                   | I959                                | HYPOTENSION UNSPECIFIED             |                                    |
|                                                                            |                                                   | T82191A                             | OTH MECH COMP CARD PULSE GEN INIT   |                                    |
|                                                                            |                                                   | V5881                               | FITTING&ADJ VASCULAR CATHETER       |                                    |
| 4590                                                                       | UNSPECIFIED HEMORRHAGE                            |                                     |                                     |                                    |
| T82838A                                                                    | HEM D/T VASC PROS DEV IMPL GFT INIT               |                                     |                                     |                                    |
| Diseases of the skin and subcutaneous tissue                               | Abscess                                           | L02211                              | CUTANEOUS ABSCESS OF ABDOMINAL WALL |                                    |
|                                                                            |                                                   | L02214                              | CUTANEOUS ABSCESS OF GROIN          |                                    |
|                                                                            |                                                   | L02216                              | CUTANEOUS ABSCESS OF UMBILICUS      |                                    |
|                                                                            |                                                   | L02219                              | CUTANEOUS ABSCESS TRUNK UNSPECIFIED |                                    |
|                                                                            |                                                   | L0231                               | CUTANEOUS ABSCESS OF BUTTOCK        |                                    |
|                                                                            |                                                   | L02411                              | CUTANEOUS ABSCESS OF RIGHT AXILLA   |                                    |
|                                                                            |                                                   | L02415                              | CUTANEOUS ABSCESS RIGHT LOWER LIMB  |                                    |
|                                                                            |                                                   | L02416                              | CUTANEOUS ABSCESS LEFT LOWER LIMB   |                                    |
|                                                                            |                                                   | L02511                              | CUTANEOUS ABSCESS OF RIGHT HAND     |                                    |
|                                                                            |                                                   | L0291                               | CUTANEOUS ABSCESS UNSPECIFIED       |                                    |
|                                                                            |                                                   | L0501                               | PILONIDAL CYST WITH ABSCESS         |                                    |
|                                                                            |                                                   | Cellulitis                          | 68100                               | UNSPEC CELLULITIS&ABSCESS FINGER   |
|                                                                            |                                                   |                                     | 68110                               | UNSPECIFIED CELLULITIS&ABSCESS TOE |
|                                                                            | 6819                                              |                                     | CELLULITIS&ABSCESS UNSPEC DIGIT     |                                    |
|                                                                            | 6820                                              |                                     | CELLULITIS AND ABSCESS OF FACE      |                                    |
|                                                                            | 6821                                              |                                     | CELLULITIS AND ABSCESS OF NECK      |                                    |
|                                                                            | 6822                                              |                                     | CELLULITIS AND ABSCESS OF TRUNK     |                                    |
|                                                                            | 6823                                              |                                     | CELLULITIS&ABSC UPPER ARM&FOREARM   |                                    |
|                                                                            | 6824                                              |                                     | CELLULITIS&ABSC HAND NO FNGR&THUMB  |                                    |
|                                                                            | 6825                                              |                                     | CELLULITIS AND ABSCESS OF BUTTOCK   |                                    |
|                                                                            | 6826                                              |                                     | CELLULITIS&ABSCESS LEG EXCEPT FOOT  |                                    |
|                                                                            | 6827                                              | CELLULITIS&ABSCESS FOOT EXCEPT TOES |                                     |                                    |

**Table A2: Component Diagnoses of Clinical Acute Care Categories, continued**

| Category                                                | Clinical Grouping                   | Diagnosis Code                                                   | Description                         |                                  |
|---------------------------------------------------------|-------------------------------------|------------------------------------------------------------------|-------------------------------------|----------------------------------|
| Diseases of the skin and subcutaneous tissue, continued | Cellulitis, continued               | 6828                                                             | CELLULITIS&ABSCESS OTHER SPEC SITE  |                                  |
|                                                         |                                     | 6829                                                             | CELLULITIS&ABSCESS UNSPECIFIED SITE |                                  |
|                                                         |                                     | 72930                                                            | PANNICULITIS, UNSPECIFIED SITE      |                                  |
|                                                         |                                     | 72939                                                            | PANNICULITIS OF OTHER SITES         |                                  |
|                                                         |                                     | L03114                                                           | CELLULITIS OF LEFT UPPER LIMB       |                                  |
|                                                         |                                     | L03115                                                           | CELLULITIS OF RIGHT LOWER LIMB      |                                  |
|                                                         |                                     | L03116                                                           | CELLULITIS OF LEFT LOWER LIMB       |                                  |
|                                                         |                                     | L03211                                                           | CELLULITIS OF FACE                  |                                  |
|                                                         |                                     | L03311                                                           | CELLULITIS OF ABDOMINAL WALL        |                                  |
|                                                         | Edema                               | 7823                                                             | EDEMA                               |                                  |
|                                                         | Rash, skin eruption or urticarial   | 6926                                                             | CNTC DERMATITIS&OTH ECZEMA-PLANTS   |                                  |
|                                                         |                                     | 6929                                                             | CONTCT DERMATIT&OTH ECZEMA-UNS CAUS |                                  |
|                                                         |                                     | 6930                                                             | DERMATITIS-RX&MEDS TAKEN INTRLLY    |                                  |
|                                                         |                                     | 6931                                                             | DERMATITIS DUE FOOD TAKEN INTRLLY   |                                  |
|                                                         |                                     | 7051                                                             | PRICKLY HEAT                        |                                  |
|                                                         |                                     | 7080                                                             | ALLERGIC URTICARIA                  |                                  |
|                                                         |                                     | 7089                                                             | UNSPECIFIED URTICARIA               |                                  |
|                                                         |                                     | 70900                                                            | DYSCHROMIA, UNSPECIFIED             |                                  |
|                                                         |                                     | 7821                                                             | RASH&OTH NONSPECIFIC SKIN ERUPTION  |                                  |
|                                                         |                                     | L509                                                             | URTICARIA UNSPECIFIED               |                                  |
|                                                         |                                     | R21                                                              | RASH OTH NONSPECIFIC SKIN ERUPTION  |                                  |
|                                                         |                                     | Wound of skin including laceration, burn, contusion and puncture | 70707                               | PRESSURE ULCER HEEL              |
|                                                         |                                     |                                                                  | 8730                                | OPEN WOUND SCLP W/O MENTION COMP |
|                                                         | 87320                               |                                                                  | OPEN WND NSE UNS SITE W/O COMP      |                                  |
|                                                         | 87340                               |                                                                  | OPEN WND FCE UNS SITE W/O COMP      |                                  |
|                                                         | 87341                               |                                                                  | OPEN WOUND CHEEK W/O MENTION COMP   |                                  |
|                                                         | 87342                               |                                                                  | OPEN WND FOREHEAD W/O MENTION COMP  |                                  |
|                                                         | 87343                               |                                                                  | OPEN WOUND LIP WITHOUT MENTION COMP |                                  |
|                                                         | 87344                               |                                                                  | OPEN WOUND JAW WITHOUT MENTION COMP |                                  |
|                                                         | 87349                               |                                                                  | OPEN WND FCE OTH&MX SITE W/O COMP   |                                  |
|                                                         | 87352                               |                                                                  | OPEN WOUND OF FOREHEAD, COMPLICATED |                                  |
|                                                         | 87353                               |                                                                  | OPEN WOUND OF LIP, COMPLICATED      |                                  |
|                                                         | 87361                               |                                                                  | OPEN WND BUCCAL MUCOS W/O COMP      |                                  |
|                                                         | 87363                               |                                                                  | TOOTH BROKEN FX TRAUMA W/O COMP     |                                  |
|                                                         | 87364                               |                                                                  | OPEN WND TONGUE&FLR MOUTH W/O COMP  |                                  |
|                                                         | 88100                               |                                                                  | OPEN WOUND FOREARM W/O MENTION COMP |                                  |
|                                                         | 88101                               |                                                                  | OPEN WOUND ELB WITHOUT MENTION COMP |                                  |
|                                                         | 8820                                |                                                                  | OPEN WND HND NO FNGR ALONE W/O COMP |                                  |
|                                                         | 8821                                |                                                                  | OPEN WOUND HAND NO FNGR ALONE COMP  |                                  |
|                                                         | 8830                                |                                                                  | OPEN WOUND FINGER W/O MENTION COMP  |                                  |
|                                                         | 8831                                |                                                                  | OPEN WOUND OF FINGER, COMPLICATED   |                                  |
|                                                         | 8832                                |                                                                  | OPEN WOUND FINGER W/TENDON INVLV    |                                  |
|                                                         | 8840                                |                                                                  | MX&UNS OPN WND UP LIMB W/O COMP     |                                  |
|                                                         | 8900                                |                                                                  | OPEN WOUND HIP&THI W/O MENTION COMP |                                  |
|                                                         | 8910                                |                                                                  | OPEN WND KNEE LEG&ANK W/O COMP      |                                  |
|                                                         | 8912                                |                                                                  | OPEN WND KNEE LEG&ANK W/TEND INVLV  |                                  |
|                                                         | 8920                                |                                                                  | OPEN WND FT NO TOE ALONE W/O COMP   |                                  |
| 8922                                                    | OP WOUND FT EXP TOE W/TENDON INVOLV |                                                                  |                                     |                                  |



| <b>Table A2: Component Diagnoses of Clinical Acute Care Categories, continued</b> |                                                                             |                       |                                      |
|-----------------------------------------------------------------------------------|-----------------------------------------------------------------------------|-----------------------|--------------------------------------|
| <b>Category</b>                                                                   | <b>Clinical Grouping</b>                                                    | <b>Diagnosis Code</b> | <b>Description</b>                   |
| Diseases of the skin and subcutaneous tissue, continued                           | Wound of skin including laceration, burn, contusion and puncture, continued | 8930                  | OPEN WOUND TOE WITHOUT MENTION COMP  |
|                                                                                   |                                                                             | 9100                  | FCE NCK&SCLP NO EYE ABRAS NO INF     |
|                                                                                   |                                                                             | 9116                  | TRNK SUP FB W/O MAJ OPN WND&W/O INF  |
|                                                                                   |                                                                             | 9130                  | ARM & WRST ABRAS/FRICT BURN NO INF   |
|                                                                                   |                                                                             | 9140                  | HND NO FINGR ABRAS/FRICT BURN NO INF |
|                                                                                   |                                                                             | 9160                  | HIP LEG&ANK ABRAS/FRICT BURN NO INF  |
|                                                                                   |                                                                             | 920                   | CONTUS FACE SCALP&NECK EXCEPT EYE    |
|                                                                                   |                                                                             | 9220                  | CONTUSION OF BREAST                  |
|                                                                                   |                                                                             | 9221                  | CONTUSION OF CHEST WALL              |
|                                                                                   |                                                                             | 9222                  | CONTUSION OF ABDOMINAL WALL          |
|                                                                                   |                                                                             | 92231                 | CONTUSION OF BACK                    |
|                                                                                   |                                                                             | 92232                 | CONTUSION OF BUTTOCK                 |
|                                                                                   |                                                                             | 92300                 | CONTUSION OF SHOULDER REGION         |
|                                                                                   |                                                                             | 92301                 | CONTUSION OF SCAPULAR REGION         |
|                                                                                   |                                                                             | 92303                 | CONTUSION OF UPPER ARM               |
|                                                                                   |                                                                             | 92310                 | CONTUSION OF FOREARM                 |
|                                                                                   |                                                                             | 92311                 | CONTUSION OF ELBOW                   |
|                                                                                   |                                                                             | 92320                 | CONTUSION OF HAND                    |
|                                                                                   |                                                                             | 92321                 | CONTUSION OF WRIST                   |
|                                                                                   |                                                                             | 9233                  | CONTUSION OF FINGER                  |
|                                                                                   |                                                                             | 9239                  | CONTUSION UNSPEC PART UPPER LIMB     |
|                                                                                   |                                                                             | 92401                 | CONTUSION OF HIP                     |
|                                                                                   |                                                                             | 92410                 | CONTUSION OF LOWER LEG               |
|                                                                                   |                                                                             | 92411                 | CONTUSION OF KNEE                    |
|                                                                                   |                                                                             | 92420                 | CONTUSION OF FOOT                    |
|                                                                                   |                                                                             | 92421                 | CONTUSION OF ANKLE                   |
|                                                                                   |                                                                             | 9243                  | CONTUSION OF TOE                     |
|                                                                                   |                                                                             | 9244                  | CONTUSION MULTIPLE SITES LOWER LIMB  |
|                                                                                   |                                                                             | 9245                  | CONTUSION UNSPEC PART LOWER LIMB     |
|                                                                                   |                                                                             | 9248                  | CONTUSION OF MULTIPLE SITES NEC      |
|                                                                                   |                                                                             | 9249                  | CONTUSION OF UNSPECIFIED SITE        |
|                                                                                   |                                                                             | 94203                 | BURN TRUNK UNSPEC DEGREE ABD WALL    |
|                                                                                   |                                                                             | 94400                 | BURN UNSPEC DEGREE UNSPEC SITE HAND  |
|                                                                                   |                                                                             | 94416                 | ERYTHEMA DUE TO BURN BACK HAND       |
|                                                                                   |                                                                             | 95909                 | INJURY FACE&NECK OTHER&UNSPECIFIED   |
|                                                                                   |                                                                             | 95911                 | OTHER INJURY OF CHEST WALL           |
|                                                                                   |                                                                             | 95912                 | OTHER INJURY OF ABDOMEN              |
|                                                                                   |                                                                             | 95919                 | OTHER INJURY OTHER SITES TRUNK       |
|                                                                                   |                                                                             | 9592                  | INJURY OTH&UNSPEC SHLDR&UPPER ARM    |
|                                                                                   |                                                                             | 9593                  | INJURY OTH&UNSPEC ELB FOREARM&WRIST  |
|                                                                                   |                                                                             | 9594                  | INJURY OTH&UNSPEC HAND NO FINGER     |
|                                                                                   |                                                                             | 9595                  | INJURY OTHER AND UNSPECIFIED FINGER  |
|                                                                                   |                                                                             | 9596                  | INJURY OTHER&UNSPECIFIED HIP&THIGH   |
| 9597                                                                              | INJURY OTH&UNSPEC KNEE LEG ANK&FOOT                                         |                       |                                      |
| 9598                                                                              | INJURY OTH&UNS OTH SPEC SITE W/MX                                           |                       |                                      |
| 9599                                                                              | INJURY OTHER&UNSPEC UNSPEC SITE                                             |                       |                                      |

| <b>Table A2: Component Diagnoses of Clinical Acute Care Categories, continued</b> |                                                                             |                       |                                     |
|-----------------------------------------------------------------------------------|-----------------------------------------------------------------------------|-----------------------|-------------------------------------|
| <b>Category</b>                                                                   | <b>Clinical Grouping</b>                                                    | <b>Diagnosis Code</b> | <b>Description</b>                  |
| Diseases of the skin and subcutaneous tissue, continued                           | Wound of skin including laceration, burn, contusion and puncture, continued | S0003XA               | CONTUSION SCALP INITIAL ENCOUNTER   |
|                                                                                   |                                                                             | S0083XA               | CONTUS OTH PRT HEAD INITIAL ENCNTN  |
|                                                                                   |                                                                             | S0091XA               | ABRASION UNS PRT HEAD INITIAL ENC   |
|                                                                                   |                                                                             | S0101XA               | LACERATION W/O FB SCALP INITIAL ENC |
|                                                                                   |                                                                             | S0121XA               | LACERATION W/O FB NOSE INITIAL ENC  |
|                                                                                   |                                                                             | S01312A               | LACERATION W/O FB LT EAR INIT ENC   |
|                                                                                   |                                                                             | S01511A               | LACERATION W/O FB LIP INITIAL ENC   |
|                                                                                   |                                                                             | S0181XA               | LAC W/O FB OTH PART HEAD INIT ENC   |
|                                                                                   |                                                                             | S2002XA               | CONTUSION LEFT BREAST INITIAL ENC   |
|                                                                                   |                                                                             | S20212A               | CONTUS LT FRONT WALL THORAX INITIAL |
|                                                                                   |                                                                             | S20219A               | CONTUS UNS FRONT WALL THORAX INIT   |
|                                                                                   |                                                                             | S20229A               | CONTUS UNS BACK WALL THORAX INITIAL |
|                                                                                   |                                                                             | S300XXA               | CONTUSION LOWER BACK PELVIS INITIAL |
|                                                                                   |                                                                             | S301XXA               | CONTUSION ABDOMINAL WALL INITIAL    |
|                                                                                   |                                                                             | S30851A               | SUP FB ABDOMINAL WALL INITIAL       |
|                                                                                   |                                                                             | S3981XA               | OTHER SPEC INJURIES ABDOMEN INITIAL |
|                                                                                   |                                                                             | S40011A               | CONTUSION RIGHT SHOULDER INITIAL    |
|                                                                                   |                                                                             | S40911A               | UNS SUP INJURY RT SHOULDER INITIAL  |
|                                                                                   |                                                                             | S5001XA               | CONTUSION RIGHT ELBOW INITIAL ENC   |
|                                                                                   |                                                                             | S5002XA               | CONTUSION LEFT ELBOW INITIAL ENC    |
|                                                                                   |                                                                             | S5012XA               | CONTUSION LEFT FOREARM INITIAL ENC  |
|                                                                                   |                                                                             | S51011A               | LACERATION W/O FB RT ELBOW INITIAL  |
|                                                                                   |                                                                             | S51012A               | LACERATION W/O FB LT ELBOW INITIAL  |
|                                                                                   |                                                                             | S51811A               | LACERATION W/O FB RT FORARM INITIAL |
|                                                                                   |                                                                             | S51812A               | LACERATION W/O FB LT FOREARM INIT   |
|                                                                                   |                                                                             | S60012A               | CONTUS LT THUMB NO DAMAGE NAIL INIT |
|                                                                                   |                                                                             | S60041A               | CONTUS RT RF W/O DAMAGE NL INIT     |
|                                                                                   |                                                                             | S60211A               | CONTUSION RIGHT WRIST INITIAL ENC   |
|                                                                                   |                                                                             | S60454A               | SUPERFICIAL FB RT RING FINGER INIT  |
|                                                                                   |                                                                             | S61011A               | LAC NO FB RT THUMB NO DMG NAIL INIT |
|                                                                                   |                                                                             | S61012A               | LAC NO FB LT THUMB NO DMG NAIL INIT |
|                                                                                   |                                                                             | S61202A               | UNS OPN WND RT MF W/O DMG NAIL INIT |
|                                                                                   |                                                                             | S61210A               | LAC W/O FB RT IF W/O DMG NAIL INIT  |
|                                                                                   |                                                                             | S61211A               | LAC W/O FB LT IF W/O DMG NAIL INIT  |
|                                                                                   |                                                                             | S61214A               | LAC NO FB RT RF NO DMG NAIL INITIAL |
|                                                                                   |                                                                             | S61219A               | LAC NO FB UNS FNGR NO DMG NAIL INIT |
|                                                                                   |                                                                             | S61314A               | LAC W/O FB RT RF W/DAMAGE NAIL INIT |
|                                                                                   |                                                                             | S61402A               | UNS OPEN WOUND LT HAND INITIAL ENC  |
|                                                                                   |                                                                             | S61451A               | OPEN BITE RIGHT HAND INITIAL ENC    |
|                                                                                   |                                                                             | S7002XA               | CONTUSION LEFT HIP INITIAL ENC      |
|                                                                                   |                                                                             | S7012XA               | CONTUSION LEFT THIGH INITIAL ENC    |
|                                                                                   |                                                                             | S71111A               | LACERATION W/O FB RT THIGH INITIAL  |
|                                                                                   |                                                                             | S8001XA               | CONTUSION RIGHT KNEE INITIAL ENC    |
|                                                                                   |                                                                             | S8002XA               | CONTUSION LEFT KNEE INITIAL ENC     |
|                                                                                   |                                                                             | S8011XA               | CONTUSION RIGHT LOWER LEG INITIAL   |
|                                                                                   |                                                                             | S81012A               | LACERATION W/O FB LT KNEE INITIAL   |
|                                                                                   |                                                                             | S81811A               | LACERATION W/O FB RT LOW LEG INIT   |

| <b>Table A2: Component Diagnoses of Clinical Acute Care Categories, continued</b> |                                                                             |                                       |                                     |                        |
|-----------------------------------------------------------------------------------|-----------------------------------------------------------------------------|---------------------------------------|-------------------------------------|------------------------|
| <b>Category</b>                                                                   | <b>Clinical Grouping</b>                                                    | <b>Diagnosis Code</b>                 | <b>Description</b>                  |                        |
| Diseases of the skin and subcutaneous tissue, continued                           | Wound of skin including laceration, burn, contusion and puncture, continued | S81812A                               | LACERATION W/O FB LT LOW LEG INIT   |                        |
|                                                                                   |                                                                             | S9001XA                               | CONTUSION RIGHT ANKLE INITIAL ENC   |                        |
|                                                                                   |                                                                             | S90111A                               | CONTUS RT GRT TOE W/O DMG NAIL INIT |                        |
|                                                                                   |                                                                             | S90121A                               | CONTUS RT LESR TOES W/O DMG NL INIT |                        |
|                                                                                   |                                                                             | S91201A                               | UNS OPN WND RT GRT TOE W/DMG NL INT |                        |
|                                                                                   |                                                                             | S91332A                               | PUNCT WOUND W/O FB LT FOOT INITIAL  |                        |
|                                                                                   |                                                                             | S91342A                               | PUNCTURE WOUND W/FB LT FOOT INITIAL |                        |
|                                                                                   |                                                                             | T2020XA                               | BURN 2ND DEG HEAD FACE NCK UNS INIT |                        |
|                                                                                   |                                                                             | T22211A                               | BURN SECOND DEG RT FORARM INIT ENC  |                        |
|                                                                                   |                                                                             | T22312A                               | BURN THIRD DEG LT FOREARM INIT ENC  |                        |
|                                                                                   |                                                                             | T23101D                               | BURN FIRST DEG RT HAND UNS SUB ENC  |                        |
|                                                                                   |                                                                             | T23142A                               | BURN 1ST DEG MX LT FNGR W/THMB INIT |                        |
|                                                                                   |                                                                             | T23262A                               | BURN 2ND DEG BACK LT HAND INIT ENC  |                        |
|                                                                                   |                                                                             | T24201A                               | BURN 2ND DEG UNS RT LL NO FOOT INIT |                        |
|                                                                                   |                                                                             | T24211A                               | BURN SECOND DEG RT THIGH INIT ENC   |                        |
|                                                                                   |                                                                             | Miscellaneous dermatologic conditions | 61172                               | LUMP OR MASS IN BREAST |
|                                                                                   |                                                                             |                                       | 70909                               | OTHER DYSCHROMIA       |
|                                                                                   | 7099                                                                        |                                       | UNSPEC DISORDER SKIN&SUBCUT TISSUE  |                        |
|                                                                                   | 9144                                                                        |                                       | HAND NO FINGER INSECT BITE NO INF   |                        |
|                                                                                   | 94224                                                                       |                                       | BLISTR W/EPID LOSS DUE BURN BACK    |                        |
|                                                                                   | 94420                                                                       |                                       | BLISTR W/EPID LOSS DUE BURN HND     |                        |
|                                                                                   | L7601                                                                       |                                       | IO HEM SKN SUBQ TISS COMP DERM PROC |                        |
|                                                                                   | L7621                                                                       |                                       | POSTP H SKIN & SC TISS FLW DERM PCR |                        |
|                                                                                   | L7622                                                                       |                                       | POSTP H SKIN & SC TISS FLW OTH PCR  |                        |
|                                                                                   | L987                                                                        |                                       | EXCESS REDUNDANT SKIN & SUBQ TISSUE |                        |
|                                                                                   | M7989                                                                       |                                       | OTHER SPEC SOFT TISSUE DISORDERS    |                        |
|                                                                                   | N61                                                                         | INFLAMMATORY DISORDERS OF BREAST      |                                     |                        |
|                                                                                   | R220                                                                        | LOCALIZED SWELLING MASS & LUMP HEAD   |                                     |                        |
| R221                                                                              | LOCALIZED SWELLING MASS & LUMP NECK                                         |                                       |                                     |                        |
| R2242                                                                             | LOC SWELL MASS LUMP LT LOWER LIMB                                           |                                       |                                     |                        |
| Neurologic diseases, mental illness or substance abuse                            | Bipolar Disorder or Major Depression                                        | 29604                                 | BIPLR I D/O 1 MANIC EPIS W/PSYCHOT  |                        |
|                                                                                   |                                                                             | 29643                                 | BP I MOST RECNT MNIC SEV NO PSYCHOT |                        |
|                                                                                   |                                                                             | 29650                                 | BIPLR I MOST RECENT EPIS DPRSD UNS  |                        |
|                                                                                   |                                                                             | 29653                                 | BIPLR I RECENT DPRSD SEV NO PSYCHOT |                        |
|                                                                                   |                                                                             | 29654                                 | BIPLR I RECENT DPRSD SEV W/PSYCHOT  |                        |
|                                                                                   |                                                                             | 29664                                 | BIPLR I RECENT MIX SEV W/PSYCHOT    |                        |
|                                                                                   |                                                                             | 29680                                 | BIPOLAR DISORDER UNSPECIFIED        |                        |
|                                                                                   |                                                                             | 29689                                 | OTHER&UNSPECIFIED BIPOLAR DISORDERS |                        |
|                                                                                   |                                                                             | F314                                  | BIPOLAR CURR DEPRESS SEV W/O PSYCH  |                        |
|                                                                                   |                                                                             | F319                                  | BIPOLAR DISORDER UNSPECIFIED        |                        |
|                                                                                   |                                                                             | 29620                                 | MAJ DPRSV D/O SINGLE EPIS UNSPEC    |                        |
|                                                                                   |                                                                             | 29622                                 | MAJ DPRSV DISORDER SINGLE EPIS MOD  |                        |
|                                                                                   |                                                                             | 29623                                 | MAJ DEPRESS D/O 1 EPIS SEVERE       |                        |
|                                                                                   |                                                                             | 29624                                 | MAJ DEPRESS 1 EPIS SEVR W/PSYCHOT   |                        |
|                                                                                   |                                                                             | 29630                                 | MAJ DPRSV D/O RECUR EPIS UNSPEC     |                        |
|                                                                                   |                                                                             | 29632                                 | MAJOR DPRSV DISORDER RECUR EPIS MOD |                        |

| <b>Table A2: Component Diagnoses of Clinical Acute Care Categories, continued</b> |                                                                  |                                     |                                                      |                                     |       |                                     |
|-----------------------------------------------------------------------------------|------------------------------------------------------------------|-------------------------------------|------------------------------------------------------|-------------------------------------|-------|-------------------------------------|
| <b>Category</b>                                                                   | <b>Clinical Grouping</b>                                         | <b>Diagnosis Code</b>               | <b>Description</b>                                   |                                     |       |                                     |
| Neurologic diseases, mental illness or substance abuse                            | Bipolar Disorder or Major Depression, continued                  | 29633                               | MJR DEPRESS D/O RECUR EPIS-SEVERE                    |                                     |       |                                     |
|                                                                                   |                                                                  | 29634                               | MJR DEPRES D/O RECUR EPIS-PSYCHOTIC                  |                                     |       |                                     |
|                                                                                   |                                                                  | 3090                                | ADJ DISORDER WITH DEPRESSED MOOD                     |                                     |       |                                     |
|                                                                                   |                                                                  | 30928                               | ADJ D/O W/MIX ANXIETY&DPRSD MOOD                     |                                     |       |                                     |
|                                                                                   |                                                                  | 311                                 | DEPRESSIVE DISORDER NEC                              |                                     |       |                                     |
|                                                                                   |                                                                  | F323                                | MAJ DEPRESS 1 EPIS SEV W/PSYCH FEAT                  |                                     |       |                                     |
|                                                                                   |                                                                  | F329                                | MAJ DEPRESS D/O SINGLE EPIS UNS                      |                                     |       |                                     |
|                                                                                   |                                                                  | F331                                | MAJ DEPRESS D/O RECURRENT MOD                        |                                     |       |                                     |
|                                                                                   |                                                                  | F332                                | MAJ DEPRESS RECURR SEV W/O PSYCH                     |                                     |       |                                     |
|                                                                                   |                                                                  | F339                                | MAJOR DEPRESSIVE D/O RECURRENT UNS                   |                                     |       |                                     |
|                                                                                   | Drug or Alcohol dependence, overdose, intoxication or withdrawal |                                     | 2920                                                 | DRUG WITHDRAWAL                     |       |                                     |
|                                                                                   |                                                                  |                                     | 30480                                                | COMBOS DRUG DEPEND UNS              |       |                                     |
|                                                                                   |                                                                  |                                     | F1320                                                | SEDATIVE ANXIOLYTIC DEPEND UNCOMP   |       |                                     |
|                                                                                   |                                                                  |                                     | F1520                                                | OTH STIMULANT DEPEND UNCOMPLICATED  |       |                                     |
|                                                                                   |                                                                  |                                     | 29181                                                | ALCOHOL WITHDRAWAL                  |       |                                     |
|                                                                                   |                                                                  |                                     | 30300                                                | ACUT ALCOHLIC INTOXICATION UNS      |       |                                     |
|                                                                                   |                                                                  |                                     | 30390                                                | OTH&UNS ALCOHL DPND UNS DRUNKENNESS |       |                                     |
|                                                                                   |                                                                  |                                     | 30391                                                | OTH&UNS ALCOHL DPND CONT            |       |                                     |
|                                                                                   |                                                                  |                                     | 30500                                                | NONDPND ALCOHL ABS UNS DRUNKENNESS  |       |                                     |
|                                                                                   |                                                                  |                                     | F1010                                                | ALCOHOL ABUSE UNCOMPLICATED         |       |                                     |
|                                                                                   |                                                                  |                                     | F10129                                               | ALCOHOL ABUSE WITH INTOXICATION UNS |       |                                     |
|                                                                                   |                                                                  |                                     | F1020                                                | ALCOHOL DEPENDENCE UNCOMPLICATED    |       |                                     |
|                                                                                   |                                                                  |                                     | F10221                                               | ALC DEPEND W/INTOX DELIRIUM         |       |                                     |
|                                                                                   |                                                                  |                                     | F10230                                               | ALCOHOL DEPEND W/WITHDRAWAL UNCOMP  |       |                                     |
|                                                                                   |                                                                  |                                     | F10239                                               | ALCOHOL DEPEND W/WITHDRAWAL UNS     |       |                                     |
|                                                                                   |                                                                  |                                     | 2910                                                 | ALCOHOL WITHDRAWAL DELIRIUM         |       |                                     |
|                                                                                   |                                                                  |                                     | 30401                                                | OPIOID TYPE DEPENDENCE CONT         |       |                                     |
|                                                                                   |                                                                  |                                     | 30410                                                | SEDAT HYPNOT/ANXIOLYTIC DEPEND UNS  |       |                                     |
|                                                                                   |                                                                  |                                     | 30440                                                | AMPHET&OTH PSYCHOSTIM DPND UNS      |       |                                     |
|                                                                                   |                                                                  |                                     | 30470                                                | OPIOID/OTHER DEP-UNSPEC             |       |                                     |
|                                                                                   |                                                                  |                                     | 30590                                                | OTH MIX/UNS NONDEPEND RX ABS UNS    |       |                                     |
|                                                                                   |                                                                  |                                     | F1123                                                | OPIOID DEPENDENCE WITH WITHDRAWAL   |       |                                     |
|                                                                                   |                                                                  |                                     | 30400                                                | OPIOID TYPE DEPENDENCE UNSPEC       |       |                                     |
|                                                                                   |                                                                  |                                     | 30550                                                | NONDEPENDENT OPIOID ABUSE UNSPEC    |       |                                     |
|                                                                                   |                                                                  |                                     | F1110                                                | OPIOID ABUSE UNCOMPLICATED          |       |                                     |
|                                                                                   |                                                                  |                                     | F1120                                                | OPIOID DEPENDENCE UNCOMPLICATED     |       |                                     |
|                                                                                   |                                                                  |                                     | Headaches (e.g. tension, migraine, cluster or other) |                                     | 33944 | OTHER COMPLICATED HEADACHE SYNDROME |
|                                                                                   |                                                                  |                                     |                                                      |                                     | 34600 | MIGRAINE W/AURA W/O INTRACT W/O SM  |
|                                                                                   | 34610                                                            | MIGRAINE W/O AURA W/O INTRCT W/O SM |                                                      |                                     |       |                                     |
|                                                                                   | 34620                                                            | VAR MIGRAINE NEC W/O INTRACT W/O SM |                                                      |                                     |       |                                     |
|                                                                                   | 34682                                                            | OTH MIGRAINE W/O INTRACT W/SM       |                                                      |                                     |       |                                     |
|                                                                                   | 34690                                                            | MIGRAINE UNSP W/O INTRACT W/O SM    |                                                      |                                     |       |                                     |
| 7840                                                                              | HEADACHE                                                         |                                     |                                                      |                                     |       |                                     |
| G43009                                                                            | MIGRAINE W/O AURA NOT INTRCT W/O SE                              |                                     |                                                      |                                     |       |                                     |
| G43109                                                                            | MIGRAINE W/AURA NOT INTRACT W/O SE                               |                                     |                                                      |                                     |       |                                     |
| G43111                                                                            | MIGRAINE W/AURA INTRACT W/STAT EPI                               |                                     |                                                      |                                     |       |                                     |
| G43401                                                                            | HEMIPLEG MIGRAINE NOT INTRACT W/SM                               |                                     |                                                      |                                     |       |                                     |

| <b>Table A2: Component Diagnoses of Clinical Acute Care Categories, continued</b> |                                                                 |                                    |                                     |                                    |
|-----------------------------------------------------------------------------------|-----------------------------------------------------------------|------------------------------------|-------------------------------------|------------------------------------|
| <b>Category</b>                                                                   | <b>Clinical Grouping</b>                                        | <b>Diagnosis Code</b>              | <b>Description</b>                  |                                    |
| Neurologic diseases, mental illness or substance abuse                            | Headaches (e.g. tension, migraine, cluster or other), continued | G43809                             | OTH MIGRAINE NOT INTRACTABLE W/O SM |                                    |
|                                                                                   |                                                                 | G43909                             | MIGRAINE UNS NOT INTRACT W/O SM     |                                    |
|                                                                                   |                                                                 | G441                               | VASCULAR HEADACHE NOT ELSW CLASS    |                                    |
|                                                                                   |                                                                 | G44209                             | TENSION-TYP HEADACHE UNS NOT INTRCT |                                    |
|                                                                                   |                                                                 | R51                                | HEADACHE                            |                                    |
|                                                                                   | Subdural or Subarachnoid Bleeding                               | 4321                               | SUBDURAL HEMORRHAGE                 |                                    |
|                                                                                   |                                                                 | 85201                              | SUBARACH HEMOR NO LOC               |                                    |
|                                                                                   |                                                                 | 85202                              | SUBARACH HEMOR BRIEF LOC            |                                    |
|                                                                                   |                                                                 | 85206                              | SUBARACH HEMOR LOC UNS DURAT        |                                    |
|                                                                                   |                                                                 | 85220                              | SUBDURAL HEMOR W/O OPN ICW UNS LOC  |                                    |
|                                                                                   |                                                                 | 85222                              | SUBDURL HEMOR W/O OPN ICW BRIEF LOC |                                    |
|                                                                                   |                                                                 | 85226                              | SUBDURAL HEMOR LOC UNS DURATION     |                                    |
|                                                                                   | Head trauma including concussion                                | 3102                               | POSTCONCUSSION SYNDROME             |                                    |
|                                                                                   |                                                                 | 80126                              | CLOS FX BASE SKL-DURL HEM LOC UNS   |                                    |
|                                                                                   |                                                                 | 80320                              | OTH CLOS SKL FX-DURL HEMOR UNS SOC  |                                    |
|                                                                                   |                                                                 | 8500                               | CONCUSSION WITH NO LOC              |                                    |
|                                                                                   |                                                                 | 85011                              | CONCUSSION W/LOC 30 MINUTES OR LESS |                                    |
|                                                                                   |                                                                 | 8505                               | CONCUSSION W/LOC UNSPEC DURATION    |                                    |
|                                                                                   |                                                                 | 8509                               | UNSPECIFIED CONCUSSION              |                                    |
|                                                                                   |                                                                 | 85186                              | OTH&UNS CERB LAC NO ICW LOC UNS DUR |                                    |
|                                                                                   |                                                                 | 85401                              | ICI OTH&UNS NATR W/O OPN ICW NO LOC |                                    |
|                                                                                   |                                                                 | 95901                              | HEAD INJURY, UNSPECIFIED            |                                    |
|                                                                                   |                                                                 | S020XXA                            | FX VAULT SKULL INITIAL ENC CLOS FX  |                                    |
|                                                                                   |                                                                 | S060X0A                            | CONCUSSION WITHOUT LOC INITIAL ENC  |                                    |
|                                                                                   |                                                                 | S060X1A                            | CONCUSSION W/LOC 30 MIN/< INIT ENC  |                                    |
|                                                                                   |                                                                 | S060X9A                            | CONCUSS LOC UNS DUR INITIAL ENC     |                                    |
|                                                                                   |                                                                 | S065X9A                            | TRAU SUBDURAL HEM LOC UNS DUR INIT  |                                    |
|                                                                                   |                                                                 | S069X1A                            | UNS IC INJ LOC 30 MIN/LESS INIT ENC |                                    |
|                                                                                   |                                                                 | S098XXA                            | OTH SPEC INJURIES HEAD INITIAL ENC  |                                    |
|                                                                                   |                                                                 | Miscellaneous neurologic diagnoses | 2252                                | BENIGN NEOPLASM CEREBRAL MENINGES  |
|                                                                                   |                                                                 |                                    | 29281                               | DRUG-INDUCED DELIRIUM              |
|                                                                                   |                                                                 |                                    | 2930                                | DELIRIUM DUE CONDS CLASSIFIED ELSW |
|                                                                                   | 3229                                                            |                                    | UNSPECIFIED MENINGITIS              |                                    |
|                                                                                   | 32381                                                           |                                    | OTHER CAUSES OF ENCEPHALITIS        |                                    |
|                                                                                   | 33383                                                           |                                    | SPASMODIC TORTICOLLIS               |                                    |
|                                                                                   | 3343                                                            |                                    | OTHER CEREBELLAR ATAXIA             |                                    |
|                                                                                   | 3379                                                            |                                    | UNSPEC DISORDER AUTONOM NERV SYSTEM |                                    |
|                                                                                   | 340                                                             |                                    | MULTIPLE SCLEROSIS                  |                                    |
|                                                                                   | 34120                                                           |                                    | ACUTE TRANSVERSE MYELITIS NOS       |                                    |

| <b>Table A2: Component Diagnoses of Clinical Acute Care Categories, continued</b> |                                               |                       |                                     |
|-----------------------------------------------------------------------------------|-----------------------------------------------|-----------------------|-------------------------------------|
| <b>Category</b>                                                                   | <b>Clinical Grouping</b>                      | <b>Diagnosis Code</b> | <b>Description</b>                  |
| Neurologic diseases, mental illness or substance abuse                            | Miscellaneous neurologic diagnoses, continued | 3418                  | OTH DEMYELINATING DZ CNTRL NERV SYS |
|                                                                                   |                                               | 34839                 | OTHER ENCEPHALOPATHY                |
|                                                                                   |                                               | 3484                  | COMPRESSION OF BRAIN                |
|                                                                                   |                                               | 3490                  | REACTION TO SPINAL/LUMBAR PUNCTURE  |
|                                                                                   |                                               | 34982                 | TOXIC ENCEPHALOPATHY                |
|                                                                                   |                                               | 3501                  | TRIGEMINAL NEURALGIA                |
|                                                                                   |                                               | 3510                  | BELLS PALSY                         |
|                                                                                   |                                               | 3542                  | LESION OF ULNAR NERVE               |
|                                                                                   |                                               | 3553                  | LESION OF LATERAL POPLITEAL NERVE   |
|                                                                                   |                                               | 3569                  | UNS HREDTARY&IDIOPATH PRIPH NURPTHY |
|                                                                                   |                                               | 35781                 | CHRN INFLAM DEMYELINAT POLYNEURITIS |
|                                                                                   |                                               | 3589                  | UNSPECIFIED MYONEURAL DISORDERS     |
|                                                                                   |                                               | 7234                  | BRACHIAL NEURITIS/RADICULITIS NOS   |
|                                                                                   |                                               | 7292                  | UNS NEURALGIA NEURITIS&RADICULITIS  |
|                                                                                   |                                               | 78009                 | OTHER ALTERATION OF CONSCIOUSNESS   |
|                                                                                   |                                               | 7804                  | DIZZINESS AND GIDDINESS             |
|                                                                                   |                                               | 78097                 | ALTERED MENTAL STATUS               |
|                                                                                   |                                               | 7810                  | ABNORMAL INVOLUNTARY MOVEMENTS      |
|                                                                                   |                                               | 7820                  | DISTURBANCE OF SKIN SENSATION       |
|                                                                                   |                                               | 78451                 | DYSARTHRIA                          |
|                                                                                   |                                               | 78459                 | OTHER SPEECH DISTURBANCE            |
|                                                                                   |                                               | 95203                 | C1-C4 LEVEL W/CENTRAL CORD SYNDROME |
|                                                                                   |                                               | 9559                  | INJURY UNS NERV SHLDR GIRDL&UP LIMB |
|                                                                                   |                                               | G039                  | MENINGITIS UNSPECIFIED              |
|                                                                                   |                                               | G35                   | MULTIPLE SCLEROSIS                  |
|                                                                                   |                                               | G510                  | BELLS PALSY                         |
|                                                                                   |                                               | G5622                 | LESION ULNAR NERVE LEFT UPPER LIMB  |
|                                                                                   |                                               | G9341                 | METABOLIC ENCEPHALOPATHY            |
|                                                                                   |                                               | G960                  | CEREBROSPINAL FLUID LEAK            |
|                                                                                   |                                               | R410                  | DISORIENTATION UNSPECIFIED          |
|                                                                                   |                                               | R4182                 | ALTERED MENTAL STATUS UNSPECIFIED   |
|                                                                                   |                                               | R42                   | DIZZINESS AND GIDDINESS             |
|                                                                                   |                                               | 33394                 | RESTLESS LEGS SYNDROME              |
|                                                                                   |                                               | 33721                 | REFLX SYMPATHET DYSTROPHY UP LIMB   |
|                                                                                   |                                               | 34440                 | MONOPLÉGIA UPPER LIMB UNSPEC SIDE   |
|                                                                                   |                                               | 34510                 | GEN CONVULS EPILEPSY W/O INTRACT    |
|                                                                                   |                                               | 34581                 | OTH EPIL & RECUR SZ W/INTRACT EPIL  |
|                                                                                   |                                               | 3482                  | BENIGN INTRACRANIAL HYPERTENSION    |
|                                                                                   |                                               | 3492                  | DISORDERS OF MENINGES NEC           |
|                                                                                   |                                               | 3549                  | UNSPECIFIED MONONEURITIS UPPER LIMB |
|                                                                                   |                                               | 7812                  | ABNORMALITY OF GAIT                 |
|                                                                                   |                                               | 85404                 | ICI OTH&UNS W/O OPN ICW LOC>24 RTN  |
| G40219                                                                            | LOC-REL SX EPI CPS INTRACT W/O SE             |                       |                                     |

| <b>Table A2: Component Diagnoses of Clinical Acute Care Categories, continued</b> |                                                    |                       |                                     |
|-----------------------------------------------------------------------------------|----------------------------------------------------|-----------------------|-------------------------------------|
| <b>Category</b>                                                                   | <b>Clinical Grouping</b>                           | <b>Diagnosis Code</b> | <b>Description</b>                  |
| Ears, eyes, or respiratory complaints                                             | Asthma                                             | 49322                 | CHRONIC OBST ASTHMA W/EXACERBAT     |
|                                                                                   |                                                    | 49390                 | ASTHMA, UNSPECIFIED, UNSPEC STATUS  |
|                                                                                   |                                                    | 49391                 | ASTHMA UNSPEC W/STATUS ASTHMATICUS  |
|                                                                                   |                                                    | 49392                 | ASTHMA UNSPECIFIED W/EXACERBATION   |
|                                                                                   |                                                    | J4551                 | SEV PERSIST ASTHMA ACUTE EXACERBAT  |
|                                                                                   |                                                    | J45901                | UNS ASTHMA W/ACUTE EXACERBATION     |
|                                                                                   |                                                    | J45902                | UNS ASTHMA W/STATUS ASTHMATICUS     |
|                                                                                   |                                                    | J45909                | UNSPECIFIED ASTHMA UNCOMPLICATED    |
|                                                                                   | Cough or bronchitis (acute or chronic)             | 7862                  | COUGH                               |
|                                                                                   |                                                    | R05                   | COUGH                               |
|                                                                                   |                                                    | 4660                  | ACUTE BRONCHITIS                    |
|                                                                                   |                                                    | 490                   | BRONCHITIS NOT SPEC AS ACUT/CHRONIC |
|                                                                                   |                                                    | 49121                 | OBST CHRONIC BRONCHITIS W/EXACERBAT |
|                                                                                   |                                                    | J209                  | ACUTE BRONCHITIS UNSPECIFIED        |
|                                                                                   |                                                    | J40                   | BRONCHITIS NOT SPEC AS ACUTE/CHRON  |
|                                                                                   |                                                    | Conjunctivitis        | 37200                               |
|                                                                                   | 37230                                              |                       | UNSPECIFIED CONJUNCTIVITIS          |
|                                                                                   | 37993                                              |                       | REDNESS OR DISCHARGE OF EYE         |
|                                                                                   | 9182                                               |                       | SUPERFICIAL INJURY OF CONJUNCTIVA   |
|                                                                                   | H1031                                              |                       | UNS ACUTE CONJUNCTIVITIS RIGHT EYE  |
|                                                                                   | H109                                               |                       | UNSPECIFIED CONJUNCTIVITIS          |
|                                                                                   | S0501XA                                            |                       | INJ CONJ & CA W/O FB RT EYE INITIAL |
|                                                                                   | S0502XA                                            |                       | INJ CONJ & CA W/O FB LT EYE INITIAL |
|                                                                                   | T1512XA                                            |                       | FB CONJUNCT SAC LT EYE INITIAL ENC  |
|                                                                                   | Dental                                             | 52100                 | UNSPECIFIED DENTAL CARIES           |
|                                                                                   |                                                    | 5225                  | PERIAPICAL ABSCESS WITHOUT SINUS    |
|                                                                                   |                                                    | 5259                  | UNSPEC D/O TEETH&SUPPORTING STRCT   |
|                                                                                   |                                                    | K047                  | PERIAPICAL ABSCESS WITHOUT SINUS    |
|                                                                                   |                                                    | K0889                 | OTH SPEC DISORDERS TEETH SUPP STRCT |
|                                                                                   |                                                    | K120                  | RECURRENT ORAL APHTHAE              |
|                                                                                   |                                                    | K141                  | GEOGRAPHIC TONGUE                   |
|                                                                                   |                                                    | K146                  | GLOSSODYNIA                         |
|                                                                                   | Epistaxis                                          | 7847                  | EPISTAXIS                           |
|                                                                                   |                                                    | R040                  | EPISTAXIS                           |
|                                                                                   | Otitis media or externa                            | 38010                 | UNSPEC INFECTIVE OTITIS EXTERNA     |
|                                                                                   |                                                    | 38100                 | UNS ACUT NONSUPPRATV OTITIS MEDIA   |
|                                                                                   |                                                    | 3814                  | NONSUPPRATV OTIT MEDIA NOT AC/CHRN  |
|                                                                                   |                                                    | 38200                 | ACUT SUPPURATIVE OM W/O RUP EARDRUM |
|                                                                                   |                                                    | 3829                  | UNSPECIFIED OTITIS MEDIA            |
|                                                                                   |                                                    | H6021                 | MALIGNANT OTITIS EXTERNA RIGHT EAR  |
|                                                                                   |                                                    | H60391                | OTH INFECTIVE OTITIS EXTERNA RT EAR |
|                                                                                   |                                                    | H6691                 | OTITIS MEDIA UNSPECIFIED RIGHT EAR  |
|                                                                                   |                                                    | H6692                 | OTITIS MEDIA UNSPECIFIED LEFT EAR   |
|                                                                                   | Pharyngitis or sore throat, organism not specified | 462                   | ACUTE PHARYNGITIS                   |
|                                                                                   |                                                    | 463                   | ACUTE TONSILLITIS                   |
|                                                                                   |                                                    | 7841                  | THROAT PAIN                         |

| Table A2: Component Diagnoses of Clinical Acute Care Categories, continued |                                                               |                |                                     |
|----------------------------------------------------------------------------|---------------------------------------------------------------|----------------|-------------------------------------|
| Category                                                                   | Clinical Grouping                                             | Diagnosis Code | Description                         |
| Ears, eyes, or respiratory complaints, continued                           | Pharyngitis or sore throat, organism not specified, continued | J029           | ACUTE PHARYNGITIS UNSPECIFIED       |
|                                                                            |                                                               | J0390          | ACUTE TONSILLITIS UNSPECIFIED       |
|                                                                            |                                                               | J060           | ACUTE LARYNGOPHARYNGITIS            |
|                                                                            |                                                               | J36            | PERITONSILLAR ABSCESS               |
|                                                                            |                                                               | R070           | PAIN IN THROAT                      |
|                                                                            | Sinusitis                                                     | 4610           | ACUTE MAXILLARY SINUSITIS           |
|                                                                            |                                                               | 4611           | ACUTE FRONTAL SINUSITIS             |
|                                                                            |                                                               | 4619           | ACUTE SINUSITIS, UNSPECIFIED        |
|                                                                            |                                                               | 4730           | CHRONIC MAXILLARY SINUSITIS         |
|                                                                            |                                                               | 4739           | UNSPECIFIED SINUSITIS               |
|                                                                            |                                                               | J0100          | ACUTE MAXILLARY SINUSITIS UNS       |
|                                                                            |                                                               | J0101          | ACUTE RECURRENT MAXILLARY SINUSITIS |
|                                                                            |                                                               | J0190          | ACUTE SINUSITIS UNSPECIFIED         |
|                                                                            |                                                               | J329           | CHRONIC SINUSITIS UNSPECIFIED       |
|                                                                            | Shortness of breath, pain on breathing, hyperventilation      | 5110           | PLEURISY W/O MENTION EFFUS/CURR TB  |
|                                                                            |                                                               | 78601          | HYPERVENTILATION                    |
|                                                                            |                                                               | 78605          | SHORTNESS OF BREATH                 |
|                                                                            |                                                               | 78607          | WHEEZING                            |
|                                                                            |                                                               | 78609          | OTH DYSPNEA&RESPIRATORY ABNORM      |
|                                                                            |                                                               | 78652          | PAINFUL RESPIRATION                 |
|                                                                            |                                                               | R0600          | DYSPNEA UNSPECIFIED                 |
|                                                                            |                                                               | R0602          | SHORTNESS OF BREATH                 |
|                                                                            |                                                               | R071           | CHEST PAIN ON BREATHING             |
|                                                                            |                                                               | R0781          | PLEURODYNIA                         |
|                                                                            |                                                               | R091           | PLEURISY                            |
|                                                                            | Vertigo                                                       | 38610          | UNSPECIFIED PERIPHERAL VERTIGO      |
|                                                                            |                                                               | 38611          | BEN PAROXYSMAL POSITIONAL VERTIGO   |
|                                                                            |                                                               | H8110          | BENIGN PAROXYSMAL VERTIGO UNS EAR   |
|                                                                            | Miscellaneous diagnoses of the ear, nose and throat           | H81312         | AURAL VERTIGO LEFT EAR              |
|                                                                            |                                                               | 3804           | IMPACTED CERUMEN                    |
|                                                                            |                                                               | 38300          | ACUTE MASTOIDITIS WITHOUT COMPS     |
|                                                                            |                                                               | 38600          | UNSPECIFIED MENIERES DISEASE        |
|                                                                            |                                                               | 38630          | UNSPECIFIED LABYRINTHITIS           |
|                                                                            |                                                               | 38870          | UNSPECIFIED OTALGIA                 |
|                                                                            |                                                               | 3899           | UNSPECIFIED HEARING LOSS            |
|                                                                            |                                                               | 4779           | ALLERGIC RHINITIS CAUSE UNSPECIFIED |
|                                                                            |                                                               | 47819          | OTH DISEASES NASAL CAVITY & SINUSES |
|                                                                            |                                                               | 52460          | UNSPECIFIED TMJ DISORDERS           |
|                                                                            |                                                               | 5269           | UNSPECIFIED DISEASE OF THE JAWS     |
|                                                                            |                                                               | 52800          | STOMATITIS & MUCOSITIS UNSPECIFIED  |
|                                                                            |                                                               | 78492          | JAW PAIN                            |
|                                                                            |                                                               | 78499          | OTHER SYMPTOMS INVOLVING HEAD&NECK  |
|                                                                            |                                                               | 7868           | HICCOUGH                            |
|                                                                            |                                                               | 8020           | NASAL BONES, CLOSED FRACTURE        |
|                                                                            |                                                               | 8024           | MALAR&MAX BONES CLOSED FRACTURE     |
|                                                                            |                                                               | 8028           | OTHER FACIAL BONES, CLOSED FRACTURE |



| Table A2: Component Diagnoses of Clinical Acute Care Categories, continued |                                                                |                                    |                                     |
|----------------------------------------------------------------------------|----------------------------------------------------------------|------------------------------------|-------------------------------------|
| Category                                                                   | Clinical Grouping                                              | Diagnosis Code                     | Description                         |
| Ears, eyes, or respiratory complaints, continued                           | Miscellaneous diagnoses of the ear, nose and throat, continued | 8708                               | OTHER SPEC OPEN WOUND OCULAR ADNEXA |
|                                                                            |                                                                | 8709                               | UNSPEC OPEN WOUND OCULAR ADNEXA     |
|                                                                            |                                                                | 8728                               | OPEN WND EAR PART UNS W/O COMP      |
|                                                                            |                                                                | 931                                | FOREIGN BODY IN EAR                 |
|                                                                            |                                                                | 9330                               | FOREIGN BODY IN PHARYNX             |
|                                                                            |                                                                | H8309                              | LABYRINTHITIS UNSPECIFIED EAR       |
|                                                                            |                                                                | J95831                             | POSTPROC HEM RS ORG/STR FLW OTH PCR |
|                                                                            |                                                                | R0981                              | NASAL CONGESTION                    |
|                                                                            |                                                                | R0982                              | POSTNASAL DRIP                      |
|                                                                            | S0240DA                                                        | MAXILLARY FX LEFT SIDE INIT CLOSED |                                     |
|                                                                            | Miscellaneous ophthalmologic diagnoses                         | 3619                               | UNSPECIFIED RETINAL DETACHMENT      |
|                                                                            |                                                                | 36400                              | UNSPEC ACUTE&SUBACUTE IRIDOCYCLITIS |
|                                                                            |                                                                | 36813                              | VISUAL DISCOMFORT                   |
|                                                                            |                                                                | 3682                               | DIPLOPIA                            |
|                                                                            |                                                                | 3688                               | OTHER SPECIFIED VISUAL DISTURBANCES |
|                                                                            |                                                                | 3689                               | UNSPECIFIED VISUAL DISTURBANCE      |
|                                                                            |                                                                | 37182                              | CORNEAL DISORDER DUE CONTACT LENS   |
|                                                                            |                                                                | 3719                               | UNSPECIFIED CORNEAL DISORDER        |
|                                                                            |                                                                | 37311                              | HORDEOLUM EXTERNUM                  |
|                                                                            |                                                                | 37313                              | ABSCESS OF EYELID                   |
|                                                                            |                                                                | 37482                              | EDEMA OF EYELID                     |
|                                                                            |                                                                | 37601                              | ORBITAL CELLULITIS                  |
|                                                                            |                                                                | 37633                              | ORBITAL EDEMA OR CONGESTION         |
|                                                                            |                                                                | 37730                              | UNSPECIFIED OPTIC NEURITIS          |
|                                                                            |                                                                | 37941                              | ANISOCORIA                          |
|                                                                            |                                                                | 37991                              | PAIN IN OR AROUND EYE               |
|                                                                            |                                                                | 37992                              | SWELLING OR MASS OF EYE             |
|                                                                            |                                                                | 37999                              | OTHER ILL-DEFINED DISORDER OF EYE   |
|                                                                            |                                                                | 8700                               | LAC SKIN EYELD&PERIOCLUR AREA       |
|                                                                            |                                                                | 9181                               | SUPERFICIAL INJURY OF CORNEA        |
|                                                                            |                                                                | 9219                               | UNSPECIFIED CONTUSION OF EYE        |
|                                                                            |                                                                | 9300                               | FOREIGN BODY IN CORNEA              |
|                                                                            |                                                                | 9301                               | FOREIGN BODY IN CONJUNCTIVAL SAC    |
|                                                                            |                                                                | 9309                               | FB UNSPEC SITE EXTERNAL EYE         |
|                                                                            |                                                                | H05011                             | CELLULITIS OF RIGHT ORBIT           |
|                                                                            |                                                                | H05013                             | CELLULITIS OF BILATERAL ORBITS      |
|                                                                            |                                                                | H1132                              | CONJUNCTIVAL HEMORRHAGE LEFT EYE    |
|                                                                            |                                                                | H16001                             | UNSPECIFIED CORNEAL ULCER RIGHT EYE |
|                                                                            |                                                                | H18821                             | CORNEAL D/O DUE CONTACT LENS RT EYE |
|                                                                            |                                                                | H5711                              | OCULAR PAIN RIGHT EYE               |
|                                                                            |                                                                | H5712                              | OCULAR PAIN LEFT EYE                |
|                                                                            |                                                                | H578                               | OTHER SPEC DISORDERS EYE & ADNEXA   |
|                                                                            |                                                                | S01111A                            | LAC NO FB RT EYELID PERIOCLUR INIT  |
| S01119A                                                                    |                                                                | LAC NO FB UNS EYELD PERIOCLUR INIT |                                     |
| T1592XA                                                                    | FB EXT EYE PART UNS LT EYE INIT ENC                            |                                    |                                     |
| T2611XA                                                                    | BURN CORNEA CONJNCT SAC RT EYE INIT                            |                                    |                                     |

| Table A2: Component Diagnoses of Clinical Acute Care Categories, continued |                                                               |                                                    |                                     |
|----------------------------------------------------------------------------|---------------------------------------------------------------|----------------------------------------------------|-------------------------------------|
| Category                                                                   | Clinical Grouping                                             | Diagnosis Code                                     | Description                         |
| Ears, eyes, or respiratory complaints, continued                           | Miscellaneous diagnoses of the respiratory / pulmonary system | 48882                                              | FLU D/T ID NVEL A VIR OTH RESP MANF |
|                                                                            |                                                               | 5070                                               | PNEUMONITIS DUE INHAL FOOD/VOMITUS  |
|                                                                            |                                                               | 5109                                               | EMPHYEMA WITHOUT MENTION OF FISTULA |
|                                                                            |                                                               | 51189                                              | OTH SPEC FORMS EFFUSION NO TB       |
|                                                                            |                                                               | 5181                                               | INTERSTITIAL EMPHYSEMA              |
|                                                                            |                                                               | 5183                                               | PULMONARY EOSINOPHILIA              |
|                                                                            |                                                               | 51881                                              | ACUTE RESPIRATORY FAILURE           |
|                                                                            |                                                               | 51911                                              | ACUTE BRONCHOSPASM                  |
|                                                                            |                                                               | 7869                                               | OTH SYMPTOMS INVLV RESP SYSTEM&CHST |
|                                                                            |                                                               | 99881                                              | EMPHYSEMA RESULTING FROM PROC NEC   |
|                                                                            |                                                               | J690                                               | PNEUMONITIS D/T INHAL FOOD & VOMIT  |
|                                                                            |                                                               | J90                                                | PLEURAL EFFUSION NEC                |
|                                                                            |                                                               | R042                                               | HEMOPTYSIS                          |
|                                                                            |                                                               | R0902                                              | HYPOXEMIA                           |
|                                                                            |                                                               | R911                                               | SOLITARY PULMONARY NODULE           |
|                                                                            |                                                               | 32723                                              | OBSTRUCTIVE SLEEP APNEA             |
|                                                                            |                                                               | 49300                                              | EXTRINSIC ASTHMA, UNSPECIFIED       |
|                                                                            |                                                               | 4941                                               | BRONCHIECTASIS W/ACUTE EXACERBATION |
|                                                                            |                                                               | 5119                                               | UNSPECIFIED PLEURAL EFFUSION        |
|                                                                            |                                                               | 5184                                               | UNSPECIFIED ACUTE EDEMA OF LUNG     |
|                                                                            |                                                               | 51853                                              | ACUT CHRN RESP FAIL FLW TRAUMA SURG |
|                                                                            |                                                               | 51882                                              | OTHER PULMONARY INSUFFICIENCY NEC   |
|                                                                            |                                                               | 51883                                              | CHRONIC RESPIRATORY FAILURE         |
|                                                                            |                                                               | 51884                                              | ACUTE&CHRONIC RESPIRATORY FAILURE   |
|                                                                            |                                                               | 78600                                              | UNSPECIFIED RESPIRATORY ABNORMALITY |
|                                                                            |                                                               | 8602                                               | TRAUMAT HEMOTHORAX-W/O OPN WND      |
|                                                                            |                                                               | 99739                                              | OTHER RESPIRATORY COMPLICATIONS     |
| J9383                                                                      | OTHER PNEUMOTHORAX                                            |                                                    |                                     |
| J9601                                                                      | ACUTE RESPIRATORY FAIL W/HYPOXIA                              |                                                    |                                     |
| J9602                                                                      | ACUTE RESP FAIL W/HYPERCAPNIA                                 |                                                    |                                     |
| Infectious and parasitic diseases <sup>a</sup>                             | Influenza or complications of influenza                       | 4870                                               | INFLUENZA WITH PNEUMONIA            |
|                                                                            |                                                               | 4871                                               | FLU W/OTH RESPIRATORY MANIFESTS     |
|                                                                            |                                                               | J09X2                                              | FLU D/T ID NOVEL FLU A VIRUS W/RESP |
|                                                                            |                                                               | J09X9                                              | FLU D/T ID NOVEL FLU VIRUS W/OTH    |
|                                                                            |                                                               | J101                                               | FLU D/T OTH ID FLU VIR OTH RSP MANF |
|                                                                            |                                                               | J111                                               | FLU D/T UNIDENT FLU VIR RESP MANIF  |
|                                                                            |                                                               | Infections of the GI tract with organism specified | 0030                                |
|                                                                            | 0074                                                          |                                                    | CRYPTOSPORIDIOSIS                   |
|                                                                            | 00843                                                         |                                                    | INTESTINAL INFS DUE CAMPYLOBACTER   |
|                                                                            | 00845                                                         |                                                    | INTST INFS-CLOSTRIDIUM DIFFICILE    |
|                                                                            | 0088                                                          |                                                    | INTESTINAL INF DUE OTH ORGANISM NEC |
|                                                                            | 0090                                                          |                                                    | INF COLITIS ENTERIT&GASTROENTERIT   |
|                                                                            | 0091                                                          |                                                    | COLTIS ENTRIT&GASTRONTRIT INF ORIGN |
|                                                                            | 0092                                                          |                                                    | INFECTIOUS DIARRHEA                 |
|                                                                            | A0811                                                         |                                                    | ACUTE GASTROENTROPATHY NORWALK AGNT |
|                                                                            | A084                                                          |                                                    | VIRAL INTESTINAL INFECTION UNSPEC   |
|                                                                            | A09                                                           | INF GASTROENTERITIS & COLITIS UNS                  |                                     |

**Table A2: Component Diagnoses of Clinical Acute Care Categories, continued**

| Category                                                   | Clinical Grouping                        | Diagnosis Code                                     | Description                          |
|------------------------------------------------------------|------------------------------------------|----------------------------------------------------|--------------------------------------|
| Infectious and parasitic diseases <sup>a</sup> , continued | Infections of the genitourinary tract    | 0980                                               | GONOCOCCAL INFECTION LOWER GU TRACT  |
|                                                            |                                          | 09941                                              | NONGNOCOCCL URETHRIT-CHLAMYDTRCHMAT  |
|                                                            |                                          | 13101                                              | TRICHOMONAL VULVOVAGINITIS           |
|                                                            |                                          | 64663                                              | INFECTIONS GU TRACT ANTPRTM          |
|                                                            |                                          | 09832                                              | OTH INF SEXL TRNSMS COMP CHILDBIRTH  |
|                                                            | Infections of the central nervous system | 0479                                               | UNSPECIFIED VIRAL MENINGITIS         |
|                                                            |                                          | A879                                               | VIRAL MENINGITIS UNSPECIFIED         |
|                                                            |                                          | M4656                                              | OTH INFECTIVE SPONDYLOPATHIES LUMB   |
|                                                            | Pneumonia                                | 46619                                              | ACUT BRONCHIOLITIS-OTH INF ORGNSMS   |
|                                                            |                                          | 4820                                               | PNEUMONIA DUE KLEBSIELLA PNEUMONIAE  |
|                                                            |                                          | 48289                                              | PNEUMONIA DUE OTHER SPEC BACTERIA    |
|                                                            |                                          | 486                                                | PNEUMONIA, ORGANISM UNSPECIFIED      |
|                                                            |                                          | J156                                               | PNEUMONIA DT OTH GRAM-NEG BACTERIA   |
|                                                            |                                          | J180                                               | BRONCHOPNEUMONIA UNS ORGANISM        |
|                                                            |                                          | J189                                               | PNEUMONIA UNSPECIFIED ORGANISM       |
|                                                            |                                          | Infections associated with operations / procedures | 53981                                |
|                                                            | 99662                                    |                                                    | INF&INFLAM REACT TO VASC DEVICE      |
|                                                            | 99859                                    |                                                    | OTHER POSTOPERATIVE INFECTION NEC    |
|                                                            | K9422                                    |                                                    | GASTROSTOMY INFECTION                |
|                                                            | T814XXA                                  |                                                    | INFECTION FOLLOW PROC INITIAL ENC    |
|                                                            | Sepsis                                   | 0380                                               | STREPTOCOCCAL SEPTICEMIA             |
|                                                            |                                          | 03811                                              | METH SUSCEPTIBLE STAPH SEPTICEMIA    |
|                                                            |                                          | 03842                                              | SEPTICEMIA DUE TO ESCHERICHIA COLI   |
|                                                            |                                          | 03849                                              | OTH SEPTICEMIA DUE GM-NEG ORGANISM   |
|                                                            |                                          | 0389                                               | UNSPECIFIED SEPTICEMIA               |
|                                                            |                                          | 7907                                               | BACTEREMIA                           |
|                                                            |                                          | A419                                               | SEPSIS UNSPECIFIED ORGANISM          |
|                                                            | Upper respiratory infection              | 4659                                               | ACUTE URIS OF UNSPECIFIED SITE       |
|                                                            |                                          | J069                                               | ACUTE UP RESPIRATORY INFECTION UNS   |
|                                                            | Skin infection                           | 1104                                               | DERMATOPHYTOSIS OF FOOT              |
|                                                            |                                          | 1123                                               | CANDIDIASIS OF SKIN AND NAILS        |
|                                                            |                                          | 6869                                               | UNSPEC LOCAL INF SKIN&SUBCUT TISSUE  |
|                                                            |                                          | 9104                                               | FACE-NCK&SCLP NO EYE INSECT BITE INF |
|                                                            |                                          | 9165                                               | HIP THIGH LEG&ANKLE INSECT BITE INF  |
|                                                            | Unspecified urinary tract infections     | 5990                                               | UTI SITE NOT SPECIFIED               |
|                                                            |                                          | N390                                               | UTI SITE NOT SPECIFIED               |
|                                                            | Viral conjunctivitis                     | B309                                               | VIRAL CONJUNCTIVITIS UNSPECIFIED     |
|                                                            | Streptococcal Pharyngitis                | 0340                                               | STREPTOCOCCAL SORE THROAT            |
|                                                            |                                          | J020                                               | STREPTOCOCCAL PHARYNGITIS            |
|                                                            | Miscellaneous infections                 | 03812                                              | METH RESISTANT STAPH SEPTICEMIA      |
|                                                            |                                          | 04112                                              | METHICILLIN RESISTANT STAPH AUREUS   |
|                                                            |                                          | 0419                                               | BACTERL INF UNSPEC CCE & UNS SITE    |
|                                                            |                                          | 05311                                              | GENICULATE HERPES ZOSTER             |
|                                                            |                                          | 0539                                               | HERPES ZOSTER WITHOUT MENTION COMP   |
|                                                            |                                          | 0539                                               | HERPES ZOSTER WITHOUT MENTION COMP   |
|                                                            |                                          | 0549                                               | HERPES SIMPLEX WITHOUT MENTION COMP  |
|                                                            |                                          | 0579                                               | UNSPECIFIED VIRAL EXANTHEM           |
|                                                            | 06640                                    | WEST NILE FEVER UNSPECIFIED                        |                                      |

| Table A2: Component Diagnoses of Clinical Acute Care Categories, continued |                                     |                |                                     |
|----------------------------------------------------------------------------|-------------------------------------|----------------|-------------------------------------|
| Category                                                                   | Clinical Grouping                   | Diagnosis Code | Description                         |
| Infectious and parasitic diseases <sup>a</sup> , continued                 | Miscellaneous infections, continued | 0743           | HAND, FOOT, AND MOUTH DISEASE       |
|                                                                            |                                     | 075            | INFECTIOUS MONONUCLEOSIS            |
|                                                                            |                                     | 07999          | UNSPEC VIRAL INF CCE & UNS SITE     |
|                                                                            |                                     | 0820           | SPOTTED FEVERS                      |
|                                                                            |                                     | 08881          | LYME DISEASE                        |
|                                                                            |                                     | 1000           | LEPTOSPIROSIS ICTEROHEMORRHAGICA    |
|                                                                            |                                     | 1120           | CANDIDIASIS OF MOUTH                |
|                                                                            |                                     | 1369           | UNSPEC INFECTIOUS&PARASITIC DZ      |
|                                                                            |                                     | 3570           | ACUTE INFECTIVE POLYNEURITIS        |
|                                                                            |                                     | 4809           | UNSPECIFIED VIRAL PNEUMONIA         |
|                                                                            |                                     | 481            | PNEUMOCOCCAL PNEUMONIA              |
|                                                                            |                                     | 99662          | INF&INFLAM REACT TO VASC DEVICE     |
|                                                                            |                                     | 99669          | INF&INFLAM REACT INT PROS DEVICE    |
|                                                                            |                                     | 99932          | BLOODSTREAM INFECTION D/T CVC       |
|                                                                            |                                     | 99933          | LOCAL INFECTION D/T CENTRL VEN CATH |
|                                                                            |                                     | A047           | ENTEROCOLIT D/T CLOSTRIDM DIFFICILE |
|                                                                            |                                     | A6000          | HERPESVIRAL INF UROGENITAL SYS UNS  |
|                                                                            |                                     | B029           | ZOSTER WITHOUT COMPLICATIONS        |
|                                                                            |                                     | B349           | VIRAL INFECTION UNSPECIFIED         |
|                                                                            |                                     | J111           | FLU D/T UNIDENT FLU VIR RESP MANIF  |
|                                                                            |                                     | J208           | ACUTE BRONCHITIS D/T SPEC ORGANISMS |
|                                                                            |                                     | K9581          | INFECTION D/T OTH BARIATRIC PROC    |
|                                                                            |                                     | T8451XA        | INF INFLM RXN INT RT HIP PROS INIT  |
|                                                                            |                                     | T8579XA        | INF INFLM RXN OTH INT PROS DEV INIT |
|                                                                            |                                     | V0179          | CONTACT/EXPOSURE OTH VIRAL DISEASES |
|                                                                            |                                     | V0184          | CONTACT/EXPOSURE TO MENINGOCOCCUS   |
|                                                                            |                                     | V045           | NEED PROPH VACC AGAINST RABIES      |
| Diseases of the genitourinary (GU) system                                  | Dysuria                             | 7881           | DYSURIA                             |
|                                                                            |                                     | 78863          | URGENCY OF URINATION                |
|                                                                            |                                     | R300           | DYSURIA                             |
|                                                                            | Gynecologic diagnoses               | 2180           | SUBMUCOUS LEIOMYOMA OF UTERUS       |
|                                                                            |                                     | 2181           | INTRAMURAL LEIOMYOMA OF UTERUS      |
|                                                                            |                                     | 2189           | LEIOMYOMA OF UTERUS, UNSPECIFIED    |
|                                                                            |                                     | 220            | BENIGN NEOPLASM OF OVARY            |
|                                                                            |                                     | 6142           | SALPINGITIS&OOPHORITIS NOT SPEC     |
|                                                                            |                                     | 6143           | ACUTE PARAMETRITIS&PELV CELLULITIS  |
|                                                                            |                                     | 6146           | PELVIC PERITONEAL ADHESIONS, FEMALE |
|                                                                            |                                     | 6150           | ACUTE INFLAM DISEASE UTERUS NO CERV |
|                                                                            |                                     | 6159           | UNSPEC INFLAMMATORY DISEASE UTERUS  |
|                                                                            |                                     | 6160           | CERVICITIS AND ENDOCERVICITIS       |
|                                                                            |                                     | 61610          | UNSPEC VAGINITIS&VULVOVAGINITIS     |
|                                                                            |                                     | 6162           | CYST OF BARTHOLINS GLAND            |
|                                                                            |                                     | 6164           | OTHER ABSCESS OF VULVA              |
|                                                                            |                                     | 6170           | ENDOMETRIOSIS OF UTERUS             |
|                                                                            |                                     | 6171           | ENDOMETRIOSIS OF OVARY              |
|                                                                            |                                     | 6173           | ENDOMETRIOSIS OF PELVIC PERITONEUM  |
|                                                                            |                                     | 61804          | RECTOCELE W/O MENTION UTERN PROLAPS |

| Table A2: Component Diagnoses of Clinical Acute Care Categories, continued |                                  |                |                                     |
|----------------------------------------------------------------------------|----------------------------------|----------------|-------------------------------------|
| Category                                                                   | Clinical Grouping                | Diagnosis Code | Description                         |
| Diseases of the genitourinary (GU) system                                  | Gynecologic diagnoses, continued | 6181           | UTERN PROLAPS W/O VAG WALL PROLAPS  |
|                                                                            |                                  | 6182           | UTEROVAGINAL PROLAPSE, INCOMPLETE   |
|                                                                            |                                  | 6183           | UTEROVAGINAL PROLAPSE, COMPLETE     |
|                                                                            |                                  | 6184           | UTEROVAGINAL PROLAPSE, UNSPECIFIED  |
|                                                                            |                                  | 6185           | PROLAPSE VAGINAL VAULT AFTER HYST   |
|                                                                            |                                  | 61889          | OTHER SPECIFIED GENITAL PROLAPSE    |
|                                                                            |                                  | 6202           | OTHER AND UNSPECIFIED OVARIAN CYST  |
|                                                                            |                                  | 6204           | PROLAPSE/HERNIA OVARY&FALLOP TUBE   |
|                                                                            |                                  | 6205           | TORSION OVARY OVARIAN PEDICLE/TUBE  |
|                                                                            |                                  | 6208           | OTH NONINFLAM D/O OVRY TUBE&BRD LIG |
|                                                                            |                                  | 6238           | OTH SPEC NONINFLAM DISORDER VAGINA  |
|                                                                            |                                  | 6253           | DYSMENORRHEA                        |
|                                                                            |                                  | 6255           | PELVIC CONGESTION SYNDROME          |
|                                                                            |                                  | 6259           | UNSPEC SX ASSOC W/FE GENIT ORGN     |
|                                                                            |                                  | 6262           | EXCESSIVE OR FREQUENT MENSTRUATION  |
|                                                                            |                                  | 6264           | IRREGULAR MENSTRUAL CYCLE           |
|                                                                            |                                  | 6268           | OTH D/O MENS ABN BLEED FE GNT TRACT |
|                                                                            |                                  | 6269           | UNS D/O MENS ABN BLEED FE GNT TRACT |
|                                                                            |                                  | 6270           | PREMENOPAUSAL MENORRHAGIA           |
|                                                                            |                                  | 63571          | INCPL LEGL INDUCD AB W/OTH COMPS    |
|                                                                            |                                  | 9392           | FOREIGN BODY IN VULVA AND VAGINA    |
|                                                                            |                                  | D250           | SUBMUCOUS LEIOMYOMA OF UTERUS       |
|                                                                            |                                  | D251           | INTRAMURAL LEIOMYOMA OF UTERUS      |
|                                                                            |                                  | D259           | LEIOMYOMA OF UTERUS UNSPECIFIED     |
|                                                                            |                                  | D270           | BENIGN NEOPLASM OF RIGHT OVARY      |
|                                                                            |                                  | N7093          | SALPINGITIS & OOPHORITIS UNS        |
|                                                                            |                                  | N730           | ACUTE PARAMETRITIS PELV CELLULITIS  |
|                                                                            |                                  | N739           | FE PELVIC INFLAMMATORY DISEASE UNS  |
|                                                                            |                                  | N750           | CYST OF BARTHOLINS GLAND            |
|                                                                            |                                  | N764           | ABSCESS OF VULVA                    |
|                                                                            |                                  | N809           | ENDOMETRIOSIS UNSPECIFIED           |
|                                                                            |                                  | N8189          | OTHER FEMALE GENITAL PROLAPSE       |
|                                                                            |                                  | N83201         | UNSPECIFIED OVARIAN CYST RIGHT SIDE |
|                                                                            |                                  | N83202         | UNSPECIFIED OVARIAN CYST LEFT SIDE  |
|                                                                            |                                  | N8320          | UNSPECIFIED OVARIAN CYSTS           |
|                                                                            |                                  | N83292         | OTHER OVARIAN CYST LEFT SIDE        |
|                                                                            |                                  | N839           | OTH NONINFL D/O OVARY TUBE&BRD LIG  |
|                                                                            |                                  | N898           | OTH SPEC NONINFLAMMATORY D/O VAGINA |
|                                                                            |                                  | N920           | EXCESS FREQ MENSTRUATION W/REG CYCL |
|                                                                            |                                  | N921           | EXCESS & FREQ MEN W/IRREG CYCLE     |
|                                                                            |                                  | N938           | OTH SPEC ABNORMAL UTERINE VAG BLEED |
|                                                                            |                                  | N939           | ABNORMAL UTERINE VAGINAL BLEED UNS  |
|                                                                            |                                  | N949           | UNS COND W/FE GENIT ORGN MENST CYCL |
|                                                                            |                                  | O034           | INCOMPL SPONT AB W/O COMPLICATION   |
|                                                                            |                                  | O82            | ENCOUNTER FOR CD WITHOUT INDICATION |
|                                                                            |                                  | R102           | PELVIC AND PERINEAL PAIN            |
|                                                                            |                                  | S30814A        | ABRASION VAGINA & VULVA INITIAL ENC |
|                                                                            |                                  | S3140XA        | UNS OPEN WOUND VAGINA VULVA INITIAL |
|                                                                            |                                  | T192XXA        | FOREIGN BODY VULVA VAGINA INIT ENC  |

| Table A2: Component Diagnoses of Clinical Acute Care Categories, continued |                                                            |                                           |                                     |                                    |
|----------------------------------------------------------------------------|------------------------------------------------------------|-------------------------------------------|-------------------------------------|------------------------------------|
| Category                                                                   | Clinical Grouping                                          | Diagnosis Code                            | Description                         |                                    |
| Diseases of the genitourinary (GU) system, continued                       | Hematuria                                                  | 59970                                     | HEMATURIA UNSPECIFIED               |                                    |
|                                                                            |                                                            | R319                                      | HEMATURIA UNSPECIFIED               |                                    |
|                                                                            | Diseases of the kidney or ureters, including renal failure | 5845                                      | ACUT KIDNEY FAIL LES TUBULAR NECRO  |                                    |
|                                                                            |                                                            | 5849                                      | ACUTE KIDNEY FAILURE UNSPECIFIED    |                                    |
|                                                                            |                                                            | 5859                                      | CHRONIC KIDNEY DISEASE UNSPECIFIED  |                                    |
|                                                                            |                                                            | 591                                       | HYDRONEPHROSIS                      |                                    |
|                                                                            |                                                            | 5933                                      | STRICTURE OR KINKING OF URETER      |                                    |
|                                                                            |                                                            | 5935                                      | HYDROURETER                         |                                    |
|                                                                            |                                                            | 5939                                      | UNSPECIFIED DISORDER KIDNEY&URETER  |                                    |
|                                                                            |                                                            | 59960                                     | URINARY OBSTRUCTION UNSPECIFIED     |                                    |
|                                                                            |                                                            | 59969                                     | URINARY OBSTRUCTION NEC             |                                    |
|                                                                            |                                                            | 59982                                     | INTRINSIC SPHINCTER DEFICIENCY      |                                    |
|                                                                            |                                                            | 75312                                     | CONGN POLYCYSTIC KIDNEY UNSPEC TYPE |                                    |
|                                                                            |                                                            | 78841                                     | URINARY FREQUENCY                   |                                    |
|                                                                            |                                                            | 78899                                     | OTHER SYMPTOMS INVLV URINARY SYSTEM |                                    |
|                                                                            |                                                            | 99639                                     | MECH COMP GU DEVICE IMPLANT&GFT OTH |                                    |
|                                                                            |                                                            | 99668                                     | INF&INFLAM REACT PERIT DIAL CATH    |                                    |
|                                                                            |                                                            | 99673                                     | OTH COMP-RENAL DIALYS DEV IMPL&GFT  |                                    |
|                                                                            |                                                            | 99676                                     | OTH COMPS DUE GU DEVICE IMPLANT&GFT |                                    |
|                                                                            |                                                            | 99681                                     | COMPLICATIONS TRANSPLANTED KIDNEY   |                                    |
|                                                                            |                                                            | D1771                                     | BENIGN LIPOMATOUS NEOPLASM KIDNEY   |                                    |
|                                                                            |                                                            | N12                                       | TUBULO-INTERST NEPHRIT NOT AC/CHRN  |                                    |
|                                                                            |                                                            | N132                                      | HYDRONPHROS RENL&URETRL CALCUL OBST |                                    |
|                                                                            |                                                            | N1330                                     | UNSPECIFIED HYDRONEPHROSIS          |                                    |
|                                                                            |                                                            | N170                                      | ACUTE RENAL FAILURE TUBULR NECROSIS |                                    |
|                                                                            |                                                            | N179                                      | ACUTE KIDNEY FAILURE UNSPECIFIED    |                                    |
|                                                                            |                                                            | N189                                      | CHRONIC KIDNEY DISEASE UNSPECIFIED  |                                    |
|                                                                            |                                                            | N3090                                     | CYSTITIS UNS WITHOUT HEMATURIA      |                                    |
|                                                                            |                                                            | N319                                      | NEUROMUSCULR DYSFNCTION BLADDER UNS |                                    |
|                                                                            |                                                            | R350                                      | FREQUENCY OF MICTURITION            |                                    |
|                                                                            |                                                            | R3911                                     | HESITANCY OF MICTURITION            |                                    |
|                                                                            |                                                            | T8619                                     | OTH COMPLICATION KIDNEY TRANSPLANT  |                                    |
|                                                                            |                                                            | Diagnoses of the male genitourinary tract | 6010                                | ACUTE PROSTATITIS                  |
|                                                                            |                                                            |                                           | 60490                               | UNSPECIFIED ORCHITIS&EPIDIDYMITIS  |
|                                                                            |                                                            |                                           | 6072                                | OTHER INFLAMMATORY DISORDERS PENIS |
|                                                                            | 60781                                                      |                                           | BALANITIS XEROTICA OBLITERANS       |                                    |
|                                                                            | 60886                                                      |                                           | EDEMA OF MALE GENITAL ORGANS        |                                    |
|                                                                            | 6089                                                       |                                           | UNSPEC DISORDER MALE GENITAL ORGANS |                                    |
|                                                                            | N401                                                       |                                           | BENIGN PROSTATIC HYPERPLASIA W/LUTS |                                    |
|                                                                            | N452                                                       |                                           | ORCHITIS                            |                                    |
|                                                                            | N453                                                       |                                           | EPIDIDYMO-ORCHITIS                  |                                    |

| Table A2: Component Diagnoses of Clinical Acute Care Categories, continued |                                                              |                                       |                                                                      |                                     |
|----------------------------------------------------------------------------|--------------------------------------------------------------|---------------------------------------|----------------------------------------------------------------------|-------------------------------------|
| Category                                                                   | Clinical Grouping                                            | Diagnosis Code                        | Description                                                          |                                     |
| Diseases of the genitourinary (GU) system, continued                       | Threatened or completed spontaneous abortion of pregnancy    | 632                                   | MISSED ABORTION                                                      |                                     |
|                                                                            |                                                              | 63490                                 | UNSPEC SPONT AB W/O MENTION COMP                                     |                                     |
|                                                                            |                                                              | 63491                                 | INCPL SPONT AB WITHOUT MENTION COMP                                  |                                     |
|                                                                            |                                                              | 63492                                 | COMPLETE SPONT AB W/O MENTION COMP                                   |                                     |
|                                                                            |                                                              | 64003                                 | THREATENED ABORTION, ANTEPARTUM                                      |                                     |
|                                                                            |                                                              | 00090                                 | UNS ECTOPIC PREG WO INTRAUTERINE PG                                  |                                     |
|                                                                            |                                                              | 0039                                  | COMPLETE/UNS SPONT AB W/O COMP                                       |                                     |
|                                                                            |                                                              | 0200                                  | THREATENED ABORTION                                                  |                                     |
|                                                                            | Nephrolithiasis, or stones in the ureter, bladder or urethra | 5920                                  | CALCULUS OF KIDNEY                                                   |                                     |
|                                                                            |                                                              | 5921                                  | CALCULUS OF URETER                                                   |                                     |
|                                                                            |                                                              | 5929                                  | UNSPECIFIED URINARY CALCULUS                                         |                                     |
|                                                                            |                                                              | 5942                                  | CALCULUS IN URETHRA                                                  |                                     |
|                                                                            |                                                              | 7880                                  | RENAL COLIC                                                          |                                     |
|                                                                            |                                                              | N200                                  | CALCULUS OF KIDNEY                                                   |                                     |
|                                                                            |                                                              | N201                                  | CALCULUS OF URETER                                                   |                                     |
|                                                                            | N23                                                          | UNSPECIFIED RENAL COLIC               |                                                                      |                                     |
|                                                                            | Lower or upper urinary tract infections                      | 59010                                 | AC PYLONPH NO LES RENL MDULRY NCROS                                  |                                     |
|                                                                            |                                                              | 59080                                 | UNSPECIFIED PYELONEPHRITIS                                           |                                     |
|                                                                            |                                                              | 5950                                  | ACUTE CYSTITIS                                                       |                                     |
|                                                                            |                                                              | 5959                                  | UNSPECIFIED CYSTITIS                                                 |                                     |
|                                                                            |                                                              | 6235                                  | LEUKORRHEA NOT SPEC AS INFECTIVE                                     |                                     |
|                                                                            |                                                              | N10                                   | ACUTE PYELONEPHRITIS                                                 |                                     |
|                                                                            |                                                              | N136                                  | PYONEPHROSIS                                                         |                                     |
|                                                                            |                                                              | N3000                                 | ACUTE CYSTITIS WITHOUT HEMATURIA                                     |                                     |
|                                                                            |                                                              | N3001                                 | ACUTE CYSTITIS WITH HEMATURIA                                        |                                     |
|                                                                            |                                                              | Miscellaneous genitourinary diagnoses | 59655                                                                | DETRUSOR SPHINCTER DYSSYNERGIA      |
|                                                                            | 5969                                                         |                                       | UNSPECIFIED DISORDER OF BLADDER                                      |                                     |
|                                                                            | 60000                                                        |                                       | HT PROS W/O UR OBST & OTH LUTS                                       |                                     |
|                                                                            | 60001                                                        |                                       | HT PROS W/UR OBST & OTH LUTS                                         |                                     |
|                                                                            | 61801                                                        |                                       | CYSTOCELE W/O UTERN PROLAPS MIDLN                                    |                                     |
|                                                                            | 78820                                                        |                                       | UNSPECIFIED RETENTION OF URINE                                       |                                     |
|                                                                            | 99664                                                        |                                       | INF&INFLAM REACT-INDWLL URIN CATH                                    |                                     |
|                                                                            | N320                                                         |                                       | BLADDER-NECK OBSTRUCTION                                             |                                     |
|                                                                            | N359                                                         |                                       | URETHRAL STRICTURE UNSPECIFIED                                       |                                     |
|                                                                            | R339                                                         |                                       | RETENTION OF URINE UNSPECIFIED                                       |                                     |
|                                                                            | R390                                                         |                                       | EXTRAVASATION OF URINE                                               |                                     |
|                                                                            | R8299                                                        |                                       | OTHER ABNORMAL FINDINGS IN URINE                                     |                                     |
|                                                                            | V536                                                         |                                       | PSGR TRUCK/VN INJ COLL CAR/VAN TRAF                                  |                                     |
|                                                                            | Pregnancy <sup>b</sup>                                       |                                       | Conditions of pregnancy, delivery or the immediate postpartum period | 64090                               |
|                                                                            |                                                              | 64093                                 |                                                                      | UNSPEC HEMORR EARLY PG ANTPRTM      |
|                                                                            |                                                              | 64111                                 |                                                                      | HEMORR FROM PLACENTA PREVIA W/DELIV |
| 64201                                                                      |                                                              | BEN ESSENTIAL HYPERTENSION W/DELIV    |                                                                      |                                     |
| 64223                                                                      |                                                              | OTH PRE-EXISTING HTN ANTPRTM          |                                                                      |                                     |
| 64231                                                                      |                                                              | TRANSIENT HTN PREGNANCY W/DELIV       |                                                                      |                                     |
| 64241                                                                      |                                                              | MILD/UNSPEC PRE-ECLAMPSIA W/DELIV     |                                                                      |                                     |
| 64251                                                                      |                                                              | SEVERE PRE-ECLAMPSIA, WITH DELIVERY   |                                                                      |                                     |
| 64271                                                                      |                                                              | PRE-ECLAMP/ECLAMP PRE-XST HTN DELIV   |                                                                      |                                     |
| 64293                                                                      |                                                              | UNSPECIFIED HYPERTENSION ANTEPARTUM   |                                                                      |                                     |

| <b>Table A2: Component Diagnoses of Clinical Acute Care Categories, continued</b> |                                                                                       |                       |                                     |
|-----------------------------------------------------------------------------------|---------------------------------------------------------------------------------------|-----------------------|-------------------------------------|
| <b>Category</b>                                                                   | <b>Clinical Grouping</b>                                                              | <b>Diagnosis Code</b> | <b>Description</b>                  |
| Pregnancy <sup>b</sup> ,<br>continued                                             | Conditions of pregnancy, delivery or the<br>immediate postpartum period,<br>continued | 64303                 | MILD HYPEREMESIS GRAVIDARUM ANTPRTM |
|                                                                                   |                                                                                       | 64393                 | UNSPEC VOMITING PREGNANCY ANTPRTM   |
|                                                                                   |                                                                                       | 64403                 | THREATENED PREMATURE LABOR ANTPRTM  |
|                                                                                   |                                                                                       | 64413                 | OTHER THREATENED LABOR, ANTEPARTUM  |
|                                                                                   |                                                                                       | 64421                 | EARLY ONSET DELIVERY-DEL            |
|                                                                                   |                                                                                       | 64511                 | POST TERM PG DEL W/WO ANTPRTM COND  |
|                                                                                   |                                                                                       | 64623                 | UNSPEC ANTEPARTUM RENAL DISEASE     |
|                                                                                   |                                                                                       | 64653                 | ASYMPTOMATIC BACTERIURIA ANTEPARTUM |
|                                                                                   |                                                                                       | 64683                 | OTH SPECIFED COMPLICATION ANTPRTM   |
|                                                                                   |                                                                                       | 64684                 | OTH SPEC COMPS PREVIOUS PP COND     |
|                                                                                   |                                                                                       | 64693                 | UNSPEC COMP PREGNANCY ANTPRTM       |
|                                                                                   |                                                                                       | 64761                 | OTH MATERNAL VIRAL DISEASE W/DELIV  |
|                                                                                   |                                                                                       | 64801                 | MATERNAL DM WITH DELIVERY           |
|                                                                                   |                                                                                       | 64803                 | MATERNAL DM ANTEPARTUM              |
|                                                                                   |                                                                                       | 64813                 | MTRN THYROID DYSF ANTPRTM COND/COMP |
|                                                                                   |                                                                                       | 64881                 | ABNORMAL MTRN GLU TOLERANCE W/DELIV |
|                                                                                   |                                                                                       | 64891                 | OTH CURRENT MATERNAL CCE W/DELIVERY |
|                                                                                   |                                                                                       | 64893                 | OTH CURRENT MATERNAL CCE ANTEPARTUM |
|                                                                                   |                                                                                       | 64921                 | BARIATRIC SURG COMP PG BIRTH/PP DEL |
|                                                                                   |                                                                                       | 64953                 | SPOTTING COMP PG ANTEPRTM COND/COMP |
|                                                                                   |                                                                                       | 650                   | NORMAL DELIVERY                     |
|                                                                                   |                                                                                       | 65101                 | TWIN PREGNANCY, DELIVERED           |
|                                                                                   |                                                                                       | 65251                 | HIGH FETAL HEAD AT TERM, DELIVERED  |
|                                                                                   |                                                                                       | 65261                 | MX GEST W/MALPRESNT 1 FETUS/MOR DEL |
|                                                                                   |                                                                                       | 65281                 | OTH MALPSTN/MALPRSATION FETUS DELIV |
|                                                                                   |                                                                                       | 65341                 | FETOPELVIC DISPROPORTION, DELIVERED |
|                                                                                   |                                                                                       | 65421                 | PREV C/S DEL DEL W/WO ANTPRTM COND  |
|                                                                                   |                                                                                       | 65571                 | DECR FETAL MOVMENTS MGMT MOTH DELIV |
|                                                                                   |                                                                                       | 65573                 | DCRESD FETL MOVEMENT ANTPRTM COMPL  |
|                                                                                   |                                                                                       | 65581                 | OTH KNWN/SPCT FETL ABN NEC DEL      |
|                                                                                   |                                                                                       | 65651                 | POOR FETAL GROWTH MGMT MOTH DELIV   |
|                                                                                   |                                                                                       | 65653                 | POOR FETL GROWTH ANTPRTM COND/COMPL |
|                                                                                   |                                                                                       | 65801                 | OLIGOHYDRAMNIOS, DELIVERED          |
|                                                                                   |                                                                                       | 65811                 | PREMATURE RUPTURE MEMB PG DELIV     |
|                                                                                   |                                                                                       | 65821                 | DELAY DEL SPONT/UNS RUP MEMB DEL    |
|                                                                                   |                                                                                       | 65823                 | DLAY DEL SPONT/UNS RUP MEMB ANTPRTM |
|                                                                                   |                                                                                       | 65951                 | ELDERLY PRIMIGRAVIDA, DELIVERED     |
|                                                                                   |                                                                                       | 65961                 | ELDER MXIGRAVDA DEL W/ANTPRTM COND  |
|                                                                                   |                                                                                       | 65971                 | ABN FETAL HEART RATE/RHYTHM DEL     |
|                                                                                   |                                                                                       | 65981                 | OTH INDICAT CARE/INTRVN REL L&D DEL |
|                                                                                   |                                                                                       | 66011                 | OBSTRUCTION BONY PELV DUR L&D DELIV |
|                                                                                   |                                                                                       | 66111                 | SEC UTERINE INERTIA WITH DELIVERY   |
|                                                                                   |                                                                                       | 66131                 | PRECIPITATE LABOR, WITH DELIVERY    |
|                                                                                   |                                                                                       | 66401                 | 1-DEG PERINEAL LACERATION W/DELIV   |
|                                                                                   |                                                                                       | 66411                 | 2-DEG PERINEAL LACERATION W/DELIV   |
|                                                                                   |                                                                                       | 66481                 | OTH SPEC TRAUMA PERIN&VULVA W/DELIV |
|                                                                                   |                                                                                       | 66612                 | OTH IMMEDIATE PP HEMORR W/DELIV     |
|                                                                                   |                                                                                       | 66614                 | OTH IMMEDIATE PP HEMORR PP          |
|                                                                                   |                                                                                       | 66981                 | OTH COMP L&D DEL W/WO ANTPRTM COND  |
|                                                                                   |                                                                                       | 67484                 | OTHER COMPLICATION OF PUERPERIUM    |



| <b>Table A2: Component Diagnoses of Clinical Acute Care Categories, continued</b> |                                                                                       |                       |                                     |
|-----------------------------------------------------------------------------------|---------------------------------------------------------------------------------------|-----------------------|-------------------------------------|
| <b>Category</b>                                                                   | <b>Clinical Grouping</b>                                                              | <b>Diagnosis Code</b> | <b>Description</b>                  |
| Pregnancy <sup>b</sup> ,<br>continued                                             | Conditions of pregnancy, delivery or the<br>immediate postpartum period,<br>continued | 8786                  | OPEN WOUND VAGINA W/O MENTION COMP  |
|                                                                                   |                                                                                       | N2889                 | OTHER SPEC DISORDERS KIDNEY URETER  |
|                                                                                   |                                                                                       | N99820                | POSTPCR HEM GUS ORG/STR FLW GUS PCR |
|                                                                                   |                                                                                       | O1002                 | PRE-EXIST ESS HTN COMP CHILDBIRTH   |
|                                                                                   |                                                                                       | O10912                | UNS PRE-EXIST HTN COMP PREG 2ND TRI |
|                                                                                   |                                                                                       | O133                  | GEST HTN NO SIG PROTEINURIA 3RD TRI |
|                                                                                   |                                                                                       | O134                  | GESTATIONAL HTN W/O SIGN PU COMP CB |
|                                                                                   |                                                                                       | O1403                 | MILD MOD PRE-ECLAMP 3RD TRIMESTER   |
|                                                                                   |                                                                                       | O1423                 | HELLP SYNDROME THIRD TRIMESTER      |
|                                                                                   |                                                                                       | O209                  | HEMORRHAGE EARLY PREGNANCY UNS      |
|                                                                                   |                                                                                       | O210                  | MILD HYPEREMESIS GRAVIDARUM         |
|                                                                                   |                                                                                       | O211                  | HYPEREMESIS GRAVIDA W/METAB DISTURB |
|                                                                                   |                                                                                       | O219                  | VOMITING OF PREGNANCY UNSPECIFIED   |
|                                                                                   |                                                                                       | O24420                | GEST DM CHILDBIRTH DIET CONTROL     |
|                                                                                   |                                                                                       | O24429                | GEST DM CHILDBIRTH UNS CONTROL      |
|                                                                                   |                                                                                       | O26872                | CERVICAL SHORTENING 2ND TRIMESTER   |
|                                                                                   |                                                                                       | O26891                | OTH SPEC PREG RELATED COND 1ST TRI  |
|                                                                                   |                                                                                       | O26892                | OTH SPEC PREG RELATED COND 2ND TRI  |
|                                                                                   |                                                                                       | O26893                | OTH SPEC PREG RELATED COND 3RD TRI  |
|                                                                                   |                                                                                       | O26899                | OTH SPEC PREG RELATED COND UNS TRI  |
|                                                                                   |                                                                                       | O2692                 | PREGNANCY RELATED COND UNS 2ND TRI  |
|                                                                                   |                                                                                       | O2693                 | PREGNANCY RELATED COND UNS 3RD TRI  |
|                                                                                   |                                                                                       | O30043                | TWIN PG DICHORIONIC/DIAMNIO 3RD TRI |
|                                                                                   |                                                                                       | O328XX0               | MAT CARE OTH MALPRESENT FET NA/UNS  |
|                                                                                   |                                                                                       | O34211                | MAT CARE LW TRANS SCAR PREV C/S DEL |
|                                                                                   |                                                                                       | O3421                 | MAT CARE FOR SCAR PREV CESAREAN DEL |
|                                                                                   |                                                                                       | O3432                 | MAT CARE CERV INCOMPETNCE 2ND TRI   |
|                                                                                   |                                                                                       | O364XX0               | MATERNAL CARE IU DEATH NA/UNS       |
|                                                                                   |                                                                                       | O365930               | MAT CARE OTH PR FTL GRTH 3RD TM UNS |
|                                                                                   |                                                                                       | O4103X0               | OLIGOHYDRAMNIOS THIRD TRI NA/UNS    |
|                                                                                   |                                                                                       | O42912                | PT PROM UNS TM BTW RUPT LABR 2 TRI  |
|                                                                                   |                                                                                       | O42913                | PT PROM UNS TM BTW RUPT LABR 3 TRI  |
|                                                                                   |                                                                                       | O4292                 | FT PROM UNS TM BTWN RUPT ONSET LABR |
|                                                                                   |                                                                                       | O4692                 | ANTEPARTUM HEMORR UNS 2ND TRIMESTER |
|                                                                                   |                                                                                       | O480                  | POST-TERM PREGNANCY                 |
|                                                                                   |                                                                                       | O620                  | PRIMARY INADEQUATE CONTRACTIONS     |
|                                                                                   |                                                                                       | O654                  | OBST LABR FETOPELV DISPROPORN UNS   |
|                                                                                   |                                                                                       | O691XX0               | L&D COMP CRD AROUND NCK COMPRS UNS  |
|                                                                                   |                                                                                       | O6981X0               | L&D COMP CORD NECK NO COMPRS NA/UNS |
|                                                                                   |                                                                                       | O6982X0               | L&D COMP OTH CRD ENTNGL NO CMPR UNS |
|                                                                                   |                                                                                       | O700                  | FIRST DEG PERINEAL LAC DUR DELIV    |
|                                                                                   |                                                                                       | O701                  | SECOND DEG PERINEAL LAC DUR DELIV   |
|                                                                                   |                                                                                       | O714                  | OBSTETRIC HIGH VAG LACERATION ALONE |
|                                                                                   |                                                                                       | O722                  | DELAYED & SEC POSTPARTUM HEMORRHAGE |
|                                                                                   |                                                                                       | O76                   | ABN FETL HEART RATE RHYTHM COMP L&D |
|                                                                                   |                                                                                       | O80                   | ENCOUNTR FULL-TERM UNCOMPLICATD DEL |
|                                                                                   |                                                                                       | O9089                 | OTHER COMPLICATIONS PUERPERIUM NEC  |
|                                                                                   |                                                                                       | O99013                | ANEMIA COMP PREGNANCY THIRD TRI     |
|                                                                                   |                                                                                       | O9902                 | ANEMIA COMPLICATING CHILDBIRTH      |

| Table A2: Component Diagnoses of Clinical Acute Care Categories, continued |                                                                                 |                |                                     |                                    |
|----------------------------------------------------------------------------|---------------------------------------------------------------------------------|----------------|-------------------------------------|------------------------------------|
| Category                                                                   | Clinical Grouping                                                               | Diagnosis Code | Description                         |                                    |
| Pregnancy <sup>b</sup> ,<br>continued                                      | Conditions of pregnancy, delivery or the immediate postpartum period, continued | O99214         | OBESITY COMPLICATING CHILDBIRTH     |                                    |
|                                                                            |                                                                                 | O99344         | OTH MENTAL D/O COMP CHILDBIRTH      |                                    |
|                                                                            |                                                                                 | O99519         | DISEASES RESP SYS COMP PREG UNS TRI |                                    |
|                                                                            |                                                                                 | O99619         | DZ DIGESTIVE SYS COMP PREG UNS TRI  |                                    |
|                                                                            |                                                                                 | O99844         | BARIATRIC SURG STS COMP CHILDBIRTH  |                                    |
|                                                                            |                                                                                 | O9989          | OTH DZ COMP PREG CHILDBIRTH PUERPER |                                    |
|                                                                            |                                                                                 | V3000          | SINGLE LIVEBORN HOSP W/O C-SEC      |                                    |
|                                                                            |                                                                                 | V3001          | SINGLE LIVEBORN HOSP C-SEC DELIV    |                                    |
|                                                                            |                                                                                 | Z3800          | SINGLE LIVE INFANT DELIV VAGINALLY  |                                    |
|                                                                            |                                                                                 | Z3831          | TWIN LIVEBORN INFANT DELIV C-SECT   |                                    |
| Miscellaneous                                                              | Malignancies                                                                    | 1410           | MALIGNANT NEOPLASM BASE TONGUE      |                                    |
|                                                                            |                                                                                 | 1531           | MALIGNANT NEOPLASM TRANSVERSE COLON |                                    |
|                                                                            |                                                                                 | 1623           | MALIG NEOPLSM UP LOBE BRONCHUS/LUNG |                                    |
|                                                                            |                                                                                 | 1625           | MALIG NEOPLSM LW LOBE BRONCHUS/LUNG |                                    |
|                                                                            |                                                                                 | 1742           | MALIG NEOPLSM UP-INNR QUAD FE BRST  |                                    |
|                                                                            |                                                                                 | 1748           | MALIG NEOPLSM OTH SPEC SITE FE BRST |                                    |
|                                                                            |                                                                                 | 1749           | MALIG NEOPLASM BREAST UNSPEC SITE   |                                    |
|                                                                            |                                                                                 | 1809           | MALIG NEOPLSM CERV UTERI UNS SITE   |                                    |
|                                                                            |                                                                                 | 1820           | MAL NEOPLSM CORPUS UTERI NO ISTHMUS |                                    |
|                                                                            |                                                                                 | 1830           | MALIGNANT NEOPLASM OF OVARY         |                                    |
|                                                                            |                                                                                 | 1832           | MALIGNANT NEOPLASM FALLOPIAN TUBE   |                                    |
|                                                                            |                                                                                 | 1844           | MALIG NEOPLASM VULVA UNSPEC SITE    |                                    |
|                                                                            |                                                                                 | 185            | MALIGNANT NEOPLASM OF PROSTATE      |                                    |
|                                                                            |                                                                                 | 1872           | MALIGNANT NEOPLASM OF GLANS PENIS   |                                    |
|                                                                            |                                                                                 | 1890           | MALIG NEOPLASM KIDNEY EXCEPT PELVIS |                                    |
|                                                                            |                                                                                 | 1910           | MAL NEOPLSM CEREBRUM NO LOBES&VENTS |                                    |
|                                                                            |                                                                                 | 1911           | MALIG NEOPLASM FRONTAL LOBE BRAIN   |                                    |
|                                                                            |                                                                                 | 193            | MALIGNANT NEOPLASM OF THYROID GLAND |                                    |
|                                                                            |                                                                                 | 1983           | SEC MALIG NEOPLSM BRAIN&SPINAL CORD |                                    |
|                                                                            |                                                                                 | 2330           | CARCINOMA IN SITU OF BREAST         |                                    |
|                                                                            |                                                                                 | 2381           | NEO UNCERT BHV CNCTV&OTH SFT TISS   |                                    |
|                                                                            |                                                                                 | 23875          | MYELOYDYSPLASTIC SYNDROME UNSPEC    |                                    |
|                                                                            |                                                                                 | 2390           | NEOPLASM UNSPEC NATR DIGESTV SYSTEM |                                    |
|                                                                            |                                                                                 | C182           | MALIGNANT NEOPLASM ASCENDING COLON  |                                    |
|                                                                            |                                                                                 | C50412         | MAL NEO UP-OUTER QUAD LT FEM BREAST |                                    |
|                                                                            |                                                                                 | C73            | MALIGNANT NEOPLASM OF THYROID GLAND |                                    |
|                                                                            |                                                                                 | C8510          | UNS B-CELL LYMPHOMA UNSPECIFIE SITE |                                    |
|                                                                            |                                                                                 | C9000          | MX MYELOMA NOT ACHIEVED REMISSION   |                                    |
|                                                                            |                                                                                 | D4111          | NEOPLASM UNCERT BHV RT RENAL PELVIS |                                    |
|                                                                            |                                                                                 | D4412          | NEOPLASM UNCERT BHV LT ADRENL GLAND |                                    |
|                                                                            |                                                                                 | V5811          | ENCOUNTER ANTINEOPLASTIC CHEMO      |                                    |
|                                                                            |                                                                                 | Hematologic    | 2800                                | IRON DEFIC ANEMIA SEC BLOOD LOSS   |
|                                                                            |                                                                                 |                | 2808                                | OTHER SPEC IRON DEFICIENCY ANEMIAS |
|                                                                            |                                                                                 |                | 2809                                | UNSPECIFIED IRON DEFICIENCY ANEMIA |
|                                                                            |                                                                                 |                | 2819                                | UNSPECIFIED DEFICIENCY ANEMIA      |
|                                                                            |                                                                                 |                | 2825                                | SICKLE-CELL TRAIT                  |
|                                                                            |                                                                                 |                | 2851                                | ACUTE POSTHEMORRHAGIC ANEMIA       |
|                                                                            |                                                                                 |                | 2858                                | OTHER SPECIFIED ANEMIAS            |

| Table A2: Component Diagnoses of Clinical Acute Care Categories, continued |                                     |                                               |                                       |
|----------------------------------------------------------------------------|-------------------------------------|-----------------------------------------------|---------------------------------------|
| Category                                                                   | Clinical Grouping                   | Diagnosis Code                                | Description                           |
| Miscellaneous, continued                                                   | Hematologic, continued              | 2859                                          | UNSPECIFIED ANEMIA                    |
|                                                                            |                                     | 2869                                          | OTHER&UNSPEC COAGULATION DEFECTS      |
|                                                                            |                                     | 2875                                          | UNSPECIFIED THROMBOCYTOPENIA          |
|                                                                            |                                     | 28800                                         | NEUTROPENIA UNSPECIFIED               |
|                                                                            |                                     | 2893                                          | LYMPHADENITIS UNSPEC NO MESENTERIC    |
|                                                                            |                                     | 28959                                         | OTHER DISEASES OF SPLEEN              |
|                                                                            |                                     | 7856                                          | ENLARGEMENT OF LYMPH NODES            |
|                                                                            |                                     | 79092                                         | ABNORMAL COAGULATION PROFILE          |
|                                                                            |                                     | 79099                                         | OTH NONSPEC FINDINGS EXAM BLOOD OTH   |
|                                                                            |                                     | D500                                          | IRON DEFIC ANEMIA SEC BLD LOSS CHRN   |
|                                                                            |                                     | D508                                          | OTHER IRON DEFICIENCY ANEMIAS         |
|                                                                            |                                     | D509                                          | IRON DEFICIENCY ANEMIA UNSPECIFIED    |
|                                                                            |                                     | D539                                          | NUTRITIONAL ANEMIA UNSPECIFIED        |
|                                                                            |                                     | D649                                          | ANEMIA UNSPECIFIED                    |
|                                                                            |                                     | D693                                          | IMMUNE THROMBOCYTOPENIC PURPURA       |
|                                                                            |                                     | D72825                                        | BANDEMIA                              |
|                                                                            |                                     | E8029                                         | RW ACC W/DERAIL-UNS PERSON            |
|                                                                            |                                     | E806                                          | OTHER SPECIFIED RAILWAY ACCIDENT      |
|                                                                            |                                     | Endocrine, Nutritional and Metabolic Diseases | 2409                                  |
|                                                                            | 2410                                |                                               | NONTOXIC UNINODULAR GOITER            |
|                                                                            | 2411                                |                                               | NONTOXIC MULTINODULAR GOITER          |
|                                                                            | 24200                               |                                               | TOX DIFFUSE GOITER NO CRISIS          |
|                                                                            | 24291                               |                                               | THYROTOX W/O MEN GOITER W/CRISIS      |
|                                                                            | 2449                                |                                               | UNSPECIFIED HYPOTHYROIDISM            |
|                                                                            | 2450                                |                                               | ACUTE THYROIDITIS                     |
|                                                                            | 25000                               |                                               | DB W/O COMP TYPE II/UNS NOT UNCCTRL   |
|                                                                            | 25002                               |                                               | DB W/O COMP TYPE II/UNS UNCCTRL       |
|                                                                            | 25003                               |                                               | DB W/O COMP TYPE I TYPE UNCCTRL       |
|                                                                            | 25010                               |                                               | DB W/KA TYPE II/UNS NOT UNCCTRL       |
|                                                                            | 25012                               |                                               | DB W/KETOACIDOS TYPE II/UNS UNCCTRL   |
|                                                                            | 25013                               |                                               | DB W/KETOACIDOS TYPE I UNCCTRL        |
|                                                                            | 25030                               |                                               | DB OTH COMA TYPE II/UNS NOT UNCCTRL   |
|                                                                            | 25040                               |                                               | DB W/RENAL TYPE II/UNS NOT UNCCTRL    |
|                                                                            | 25043                               |                                               | DB W/RENAL TYPE I [JUV] UNCCTRL       |
|                                                                            | 25060                               |                                               | DB W/NEURO TYPE II/UNS NOT UNCCTRL    |
|                                                                            | 25062                               |                                               | DB W/NEURO TYPE II/UNS TYPE UNCCTRL   |
|                                                                            | 25071                               |                                               | DB W/PERIPH CIRC TYPE I NOT UNCCTRL   |
|                                                                            | 25080                               |                                               | DB W/OTH MANIFEST TYPE II/UNS NOT UN  |
|                                                                            | 25082                               |                                               | DB W/OTH MANIFEST TYPE II/UNS UNCCTRL |
|                                                                            | 2511                                |                                               | OTHER SPECIFIED HYPOGLYCEMIA          |
|                                                                            | 2512                                |                                               | HYPOGLYCEMIA, UNSPECIFIED             |
|                                                                            | 2519                                |                                               | UNS D/O PANCREATIC INTRL SECRETION    |
|                                                                            | 25541                               | GLUCOCORTICOID DEFICIENCY                     |                                       |
| 2559                                                                       | UNSPECIFIED DISORDER ADRENAL GLANDS |                                               |                                       |
| 2724                                                                       | OTHER&UNSPECIFIED HYPERLIPIDEMIA    |                                               |                                       |
| 2726                                                                       | LIPODYSTROPHY                       |                                               |                                       |
| 27801                                                                      | MORBID OBESITY                      |                                               |                                       |

| Table A2: Component Diagnoses of Clinical Acute Care Categories, continued |                                                          |                |                                     |                                     |
|----------------------------------------------------------------------------|----------------------------------------------------------|----------------|-------------------------------------|-------------------------------------|
| Category                                                                   | Clinical Grouping                                        | Diagnosis Code | Description                         |                                     |
| Miscellaneous, continued                                                   | Endocrine, Nutritional and Metabolic Diseases, continued | 2781           | LOCALIZED ADIPOSITY                 |                                     |
|                                                                            |                                                          | 79029          | OTHER ABNORMAL GLUCOSE              |                                     |
|                                                                            |                                                          | 99523          | UNSPEC ADVERSE EFFECT OF INSULIN    |                                     |
|                                                                            |                                                          | 99657          | COMPLICATION, DUE TO INSULIN PUMP   |                                     |
|                                                                            |                                                          | E0590          | THYROTOXICOS UNS NO THYROTOX CRISIS |                                     |
|                                                                            |                                                          | E1022          | TYPE 1 DM W/DIABETIC CKD            |                                     |
|                                                                            |                                                          | E11621         | TYPE 2 DM W/FOOT ULCER              |                                     |
|                                                                            |                                                          | E1165          | TYPE 2 DM W/HYPERGLYCEMIA           |                                     |
|                                                                            |                                                          | E1169          | TYPE 2 DM W/OTHER SPEC COMPLICATION |                                     |
|                                                                            |                                                          | E65            | LOCALIZED ADIPOSITY                 |                                     |
|                                                                            |                                                          | E6601          | MORBID SEVERE OBES D/T EXCESS CAL   |                                     |
|                                                                            |                                                          | N2581          | SEC HYPERPARATHYROIDISM RENAL ORIGN |                                     |
|                                                                            |                                                          | 2752           | DISORDERS OF MAGNESIUM METABOLISM   |                                     |
|                                                                            |                                                          | 27541          | HYPOCALCEMIA                        |                                     |
|                                                                            |                                                          | 27542          | HYPERCALCEMIA                       |                                     |
|                                                                            |                                                          | 2760           | HYPEROSMOLALITY &OR HYPERNATREMIA   |                                     |
|                                                                            |                                                          | 2761           | HYPOSMOLALITY AND/OR HYPONATREMIA   |                                     |
|                                                                            |                                                          | 2762           | ACIDOSIS                            |                                     |
|                                                                            |                                                          | 27650          | VOLUME DEPLETION UNSPECIFIED        |                                     |
|                                                                            |                                                          | 27651          | DEHYDRATION                         |                                     |
|                                                                            |                                                          | 27652          | HYPOVOLEMIA                         |                                     |
|                                                                            |                                                          | 2767           | HYPERPOTASSEMIA                     |                                     |
|                                                                            |                                                          | 2768           | HYPOTASSEMIA                        |                                     |
|                                                                            |                                                          | 72888          | RHABDOMYOLYSIS                      |                                     |
|                                                                            |                                                          | E8342          | OTH FALL WATER TRANSPORT-CREW       |                                     |
|                                                                            |                                                          | E872           | FAIL STERILE PRECAUTION DURING PROC |                                     |
|                                                                            |                                                          | E876           | OTH&UNS MISADVENTURES DUR MED CARE  |                                     |
|                                                                            |                                                          | E8770          | FLUID OVERLOAD UNSPECIFIED          |                                     |
|                                                                            |                                                          | M6282          | RHABDOMYOLYSIS                      |                                     |
|                                                                            |                                                          | R7989          | OTH SPEC ABNORMAL FINDINGS BLD CHEM |                                     |
|                                                                            |                                                          | 261            | NUTRITIONAL MARASMUS                |                                     |
|                                                                            |                                                          | 2639           | UNSPEC PROTEIN-CALORIE MALNUTRITION |                                     |
|                                                                            |                                                          | 2651           | OTH&UNSPEC MANIFESTS THIAMINE DEFIC |                                     |
|                                                                            |                                                          | 2662           | OTHER B-COMPLEX DEFICIENCIES        |                                     |
|                                                                            |                                                          | 2690           | DEFICIENCY OF VITAMIN K             |                                     |
|                                                                            |                                                          | 7830           | ANOREXIA                            |                                     |
|                                                                            |                                                          | Pain           |                                     | 33818                               |
|                                                                            | 33819                                                    |                |                                     | OTHER ACUTE PAIN                    |
|                                                                            | 33829                                                    |                |                                     | OTHER CHRONIC PAIN                  |
|                                                                            | 7295                                                     |                |                                     | PAIN IN SOFT TISSUES OF LIMB        |
|                                                                            | 78096                                                    |                |                                     | GENERALIZED PAIN                    |
|                                                                            | G8918                                                    |                |                                     | OTHER ACUTE POSTPROCEDURAL PAIN     |
|                                                                            | R52                                                      |                |                                     | PAIN UNSPECIFIED                    |
|                                                                            | Other Miscellaneous Diagnoses                            |                | 2776                                | OTHER DEFIC CIRCULATING ENZYMES     |
|                                                                            |                                                          |                | 4578                                | OTH NONINF D/O LYMPHATIC CHANNELS   |
|                                                                            |                                                          |                | 76502                               | EXTREM FETAL IMMATURITY 500-749 GMS |
|                                                                            |                                                          |                | 78002                               | TRANSIENT ALTERATION OF AWARENESS   |
| 78050                                                                      |                                                          |                | UNSPECIFIED SLEEP DISTURBANCE       |                                     |
| 78052                                                                      |                                                          |                | INSOMNIA UNSPECIFIED                |                                     |
| 78060                                                                      |                                                          |                | FEVER UNSPECIFIED                   |                                     |

| <b>Table A2: Component Diagnoses of Clinical Acute Care Categories, continued</b> |                                             |                       |                                     |
|-----------------------------------------------------------------------------------|---------------------------------------------|-----------------------|-------------------------------------|
| <b>Category</b>                                                                   | <b>Clinical Grouping</b>                    | <b>Diagnosis Code</b> | <b>Description</b>                  |
| Miscellaneous,<br>continued                                                       | Other Miscellaneous Diagnoses,<br>continued | 78062                 | POSTPROCEDURAL FEVER                |
|                                                                                   |                                             | 7806                  | FEVER & OTH PHYSIOL DISTURBANC TEMP |
|                                                                                   |                                             | 78079                 | OTHER MALAISE AND FATIGUE           |
|                                                                                   |                                             | 7808                  | GENERALIZED HYPERHIDROSIS           |
|                                                                                   |                                             | 78093                 | MEMORY LOSS                         |
|                                                                                   |                                             | 78099                 | OTHER GENERAL SYMPTOMS              |
|                                                                                   |                                             | 78199                 | OTH SX INVLV NERV&MUSCULOSKEL SYS   |
|                                                                                   |                                             | 7905                  | OTH NONSPEC ABN SERUM ENZYM LEVELS  |
|                                                                                   |                                             | 79902                 | HYPOXEMIA                           |
|                                                                                   |                                             | 79921                 | NERVOUSNESS                         |
|                                                                                   |                                             | 7993                  | UNSPECIFIED DEBILITY                |
|                                                                                   |                                             | 79989                 | OTHER ILL-DEFINED CONDITIONS        |
|                                                                                   |                                             | 9099                  | LATE EFF OTH&UNSPEC EXTERNAL CAUS   |
|                                                                                   |                                             | 96509                 | POISN OPIATES&RELATED NARCOTICS OTH |
|                                                                                   |                                             | 9654                  | POISONING AROMATIC ANALGESICS NEC   |
|                                                                                   |                                             | 96561                 | POISN PROPIONIC ACID DERIVATIVES    |
|                                                                                   |                                             | 9657                  | POISONING OTH NON-NARCOTIC ANALGES  |
|                                                                                   |                                             | 9661                  | POISONING BY HYDANTOIN DERIVATIVES  |
|                                                                                   |                                             | 9678                  | POISONING OTHER SEDATIVES&HYPNOTICS |
|                                                                                   |                                             | 96903                 | POISONING BY SSRI                   |
|                                                                                   |                                             | 9694                  | POISN BENZODIAZEPINE-BASED TRANQ    |
|                                                                                   |                                             | 9778                  | POISN OTH SPEC RX&MEDICINAL SBSTNC  |
|                                                                                   |                                             | 9779                  | POISN UNSPEC RX/MEDICINAL SUBSTANCE |
|                                                                                   |                                             | 986                   | TOXIC EFFECT OF CARBON MONOXIDE     |
|                                                                                   |                                             | 9895                  | TOXIC EFFECT OF VENOM               |
|                                                                                   |                                             | 9925                  | HEAT EXHAUSTION, UNSPECIFIED        |
|                                                                                   |                                             | 9927                  | HEAT EDEMA                          |
|                                                                                   |                                             | 9950                  | OTHER ANAPHYLACTIC SHOCK NEC        |
|                                                                                   |                                             | 9951                  | ANGIONEUROTIC EDEMA NEC             |
|                                                                                   |                                             | 99527                 | OTHER DRUG ALLERGY                  |
|                                                                                   |                                             | 99529                 | UNS ADVRS EFF OTH RX MED&BIO SBSTNC |
|                                                                                   |                                             | 9953                  | ALLERGY UNSPECIFIED NEC             |
|                                                                                   |                                             | 99581                 | ADULT PHYSICAL ABUSE NEC            |
|                                                                                   |                                             | 99589                 | CERTAIN ADVERSE EFFECTS NEC OTHER   |
|                                                                                   |                                             | 99659                 | MECH COMP-OTH IMPL&INTRL DEVC NEC   |
|                                                                                   |                                             | 99670                 | OTH COMPS DUE UNS DEVICE IMPL&GFT   |
|                                                                                   |                                             | 99672                 | OTH COMPS-OTH CARD DEVC IMPL&GFT    |
|                                                                                   |                                             | 99674                 | OTH COMPS-OTH VASC DEVC IMPL&GFT    |
|                                                                                   |                                             | 99679                 | OTH COMP OTH PROS DEV IMPL&GFT      |
|                                                                                   |                                             | 99811                 | HEMORRHAGE COMPLICATING A PROC NEC  |
|                                                                                   |                                             | 99812                 | HEMATOMA COMPLICATING A PROC NEC    |
|                                                                                   |                                             | 99813                 | SEROMA COMPLICATING A PROC NEC      |
|                                                                                   |                                             | 9982                  | ACC PUNCT/LACRATION DURING PROC NEC |
|                                                                                   |                                             | 99831                 | DISRUPT INTERN OPERTION SURG WOUND  |
|                                                                                   |                                             | 99832                 | DISRUPT EXTERNL OPERTION SURG WOUND |
|                                                                                   |                                             | 99851                 | INFECTED POSTOPERATIVE SEROMA NEC   |
|                                                                                   |                                             | 9986                  | PERSISTENT POSTOPERATIVE FIST NEC   |
| 99883                                                                             | NON-HEALING SURGICAL WOUND NEC              |                       |                                     |
| 99889                                                                             | OTHER SPECIFIED COMPLICATIONS NEC           |                       |                                     |

| <b>Table A2: Component Diagnoses of Clinical Acute Care Categories, continued</b> |                                             |                       |                                      |
|-----------------------------------------------------------------------------------|---------------------------------------------|-----------------------|--------------------------------------|
| <b>Category</b>                                                                   | <b>Clinical Grouping</b>                    | <b>Diagnosis Code</b> | <b>Description</b>                   |
| Miscellaneous,<br>continued                                                       | Other Miscellaneous Diagnoses,<br>continued | 9989                  | UNSPEC COMPLICATION PROCEDURE NEC    |
|                                                                                   |                                             | 99988                 | OTHER INFUSION REACTION              |
|                                                                                   |                                             | E871                  | HYPO-OSMOLALITY AND HYPONATREMIA     |
|                                                                                   |                                             | I891                  | LYMPHANGITIS                         |
|                                                                                   |                                             | L299                  | PRURITUS UNSPECIFIED                 |
|                                                                                   |                                             | L500                  | ALLERGIC URTICARIA                   |
|                                                                                   |                                             | R200                  | ANESTHESIA OF SKIN                   |
|                                                                                   |                                             | R202                  | PARESTHESIA OF SKIN                  |
|                                                                                   |                                             | R209                  | UNS DISTURBANCES OF SKIN SENSATION   |
|                                                                                   |                                             | R251                  | TREMOR UNSPECIFIED                   |
|                                                                                   |                                             | R252                  | CRAMP AND SPASM                      |
|                                                                                   |                                             | R262                  | DIFFICULTY IN WALKING NEC            |
|                                                                                   |                                             | R400                  | SOMNOLENCE                           |
|                                                                                   |                                             | R490                  | DYSPHONIA                            |
|                                                                                   |                                             | R5082                 | POSTPROCEDURAL FEVER                 |
|                                                                                   |                                             | R509                  | FEVER UNSPECIFIED                    |
|                                                                                   |                                             | R531                  | WEAKNESS                             |
|                                                                                   |                                             | R5381                 | OTHER MALAISE                        |
|                                                                                   |                                             | R5383                 | OTHER FATIGUE                        |
|                                                                                   |                                             | R58                   | HEMORRHAGE NOT ELSEWHERE CLASSIFIED  |
|                                                                                   |                                             | R591                  | GENERALIZED ENLARGED LYMPH NODES     |
|                                                                                   |                                             | R599                  | ENLARGED LYMPH NODES UNSPECIFIED     |
|                                                                                   |                                             | R600                  | LOCALIZED EDEMA                      |
|                                                                                   |                                             | R609                  | EDEMA UNSPECIFIED                    |
|                                                                                   |                                             | R682                  | DRY MOUTH UNSPECIFIED                |
|                                                                                   |                                             | R748                  | ABNORMAL LEVELS OTHER SERUM ENZYMES  |
|                                                                                   |                                             | S0990XA               | UNSPECIFIED INJURY HEAD INITIAL ENC  |
|                                                                                   |                                             | S0993XA               | UNSPECIFIED INJURY FACE INITIAL ENC  |
|                                                                                   |                                             | T148                  | OTHER INJURY UNS BODY REGION         |
|                                                                                   |                                             | T1490                 | INJURY UNSPECIFIED                   |
|                                                                                   |                                             | T391X5A               | ADVRS EFF 4-AMINOPHENOL DERIV INIT   |
|                                                                                   |                                             | T402X1A               | POISON OTH OPIOIDS ACC INITIAL ENC   |
|                                                                                   |                                             | T407X1A               | POISON CANNABIS ACCIDENTAL INIT ENC  |
|                                                                                   |                                             | T438X1A               | POISN OTH PSYCHOTROPIC RX ACC INIT   |
|                                                                                   |                                             | T56891A               | TOXIC EFF OTH METALS ACC INIT ENC    |
|                                                                                   |                                             | T56894A               | TOXIC EFF OTH METALS UNDET INITIAL   |
|                                                                                   |                                             | T7421XA               | ADULT SEXL ABUSE CONFIRMED INIT ENC  |
|                                                                                   |                                             | T783XXA               | ANGIONEUROTIC EDEMA INITIAL ENC NTR  |
|                                                                                   |                                             | T7840XA               | ALLERGY UNSPECIFIED INITIAL ENC NTR  |
|                                                                                   |                                             | T8131XA               | DISRUPT EXT OP SURG WOUND NEC INIT   |
|                                                                                   |                                             | V1585                 | PERS HX CONTACT & EXP HAZARD BDY FLD |
|                                                                                   |                                             | V240                  | PP CARE&EXAM IMMEDIATE AFTER DELIV   |
|                                                                                   |                                             | V241                  | PP CARE&EXAMINATION LACTATING MOTH   |
|                                                                                   |                                             | V4589                 | OTHER POSTSURGICAL STATUS OTHER      |
|                                                                                   |                                             | V501                  | PSGR TRUCK/VAN INJ COLL PED/ANML NT  |
|                                                                                   |                                             | V5041                 | PROPHYLACTIC BREAST REMOVAL          |
|                                                                                   |                                             | V5042                 | PROPHYLACTIC OVARY REMOVAL           |
|                                                                                   |                                             | V571                  | PSGR TRUCK INJ COLL FIX OBJ NT ACC   |
|                                                                                   |                                             | V5789                 | OTH SPEC REHABILITATION PROC OTH     |
|                                                                                   |                                             | V580                  | RADIOTHERAPY                         |

| Table A2: Component Diagnoses of Clinical Acute Care Categories, continued |                                          |                |                                     |
|----------------------------------------------------------------------------|------------------------------------------|----------------|-------------------------------------|
| Category                                                                   | Clinical Grouping                        | Diagnosis Code | Description                         |
| Miscellaneous, continued                                                   | Other Miscellaneous Diagnoses, continued | V5830          | ENCOUNTER CHG/REMV NONSURG WND DRSG |
|                                                                            |                                          | V5831          | ENCOUNTER CHG/REMV SURG WOUND DRSG  |
|                                                                            |                                          | V5832          | ENCOUNTER FOR REMOVAL OF SUTURES    |
|                                                                            |                                          | V5849          | OTH SPEC AFTERCARE FOLLOW SURGERY   |
|                                                                            |                                          | V5878          | AFTERCARE FLW SURG MS SYS NEC       |
|                                                                            |                                          | V5883          | ENCOUNTER THERAPEUTIC DRUG MON      |
|                                                                            |                                          | V5889          | ENCOUNTER OTHER SPECIFIED AFTERCARE |
|                                                                            |                                          | V626           | REFUSAL TX RSN RELIGION/CONSCIENCE  |
|                                                                            |                                          | V642           | SURG/OTH PROC NOT DONE PT DECISION  |
|                                                                            |                                          | V655           | PERSN W FEARED COMPLAINT            |
|                                                                            |                                          | V6709          | F/U EXAMINATION FOLLOW OTH SURGERY  |
|                                                                            |                                          | V6759          | OTHER FOLLOW-UP EXAMINATION OTHER   |
|                                                                            |                                          | V681           | PSGR HTV INJ NONCOLL TRNSP NT ACC   |
|                                                                            |                                          | V6889          | ENCOUNTERS OTH SPEC ADMIN PRPOS OTH |
|                                                                            |                                          | V714           | PERS BD/ALIT BUS INJ COLL PEDL CYCL |
|                                                                            |                                          | V716           | PSGR BUS INJ COLL PEDL CYC TRAF ACC |
|                                                                            |                                          | V7189          | OBSERVATION OTH SPEC SUSPECTED COND |
|                                                                            |                                          | Z0000          | ENC GEN ADULT EXAM W/O ABNORM FIND  |
|                                                                            |                                          | Z008           | ENC FOR OTHER GENERAL EXAMINATION   |
|                                                                            |                                          | Z041           | ENC EXAM&OBSERV FLW TRANSPORT ACC   |
|                                                                            |                                          | Z043           | ENC EXAM&OBSERVATION FOLLOW OTH ACC |
|                                                                            |                                          | Z048           | ENC EXAM & OBSERVATION OTH REASONS  |
|                                                                            |                                          | Z049           | ENC EXAM & OBSERVATION UNS REASON   |
|                                                                            |                                          | Z23            | ENCOUNTER FOR IMMUNIZATION          |
|                                                                            |                                          | Z4001          | ENC FOR PROPHYLACTIC REMOVAL BREAST |
|                                                                            |                                          | Z421           | ENC BREAST RECON FOLLOW MASTECT     |
|                                                                            |                                          | Z4802          | ENCOUNTER FOR REMOVAL OF SUTURES    |
|                                                                            |                                          | Z4889          | ENC OTHER SPEC SURGICAL AFTERCARE   |
|                                                                            |                                          | Z760           | ENC FOR ISSUE REPEAT PRESCRIPTION   |
|                                                                            |                                          | Z9889          | OTHER SPEC POSTPROCEDURAL STATES    |

**eTable 2 lists component International Classification of Disease (ICD), version 9 and 10 codes used to flag our secondary time-to-event outcomes**

**a** Infectious and parasitic diseases were counted only if they had a specified infectious agent (e.g.: influenza); non-specific conditions likely resulting from infection were categorized under their respective body system (e.g.: gastritis codes were classified into the digestive system group).

**b** Pregnancy events were analyzed among female patients ages 18-49 on the date of their index surgeries.
